# Supplementary material for: A Similar Secretome Disturbance as a Hallmark of Non-pathogenic Botrytis cinerea ATMT-Mutants?
Source: Front Microbiol. 2019 Dec 6;10:2829. doi: 10.3389/fmicb.2019.02829 (PMC6908482; doi:10.3389/fmicb.2019.02829)
Supplement: Supplementary file 4 [file Table_3.XLSX]

## Sheet: 964 proteins up- or down-accumu
Table S3 - List of proteins up or down-accumulated in the exoproteome of the mutants NP/T1, NP/T2, NP/T3 and NP/T4 compared to the parental strain B05.10 of B. cinerea. For quantification, all unique peptides of an identified protein were included, and the total cumulative abundance was calculated by summing the abundances of all peptides allocated to the respective protein. ANOVA test was applie…
Gene ID, accession number of protein in Ensembl Fungi release 31 database (http://fungi.ensembl.org/Botrytis_cinerea/Info/Index),
SignalP, prediction of classical secretion signal sequence
TM, prediction of transmembrane domain
RATIO NPT1-4/WT, ratio between the average protein abundances for NPT1-4 and parental strain WT (B05.10)
Gene ID	NPT1/ WT	NPT2/ WT	NPT3 / WT	NPT4/ WT	SignalP / TM	Functional Classification	CAZY	MEROPS	KEGG Pathway	IPR	Pfam
Bcin01g00160			22.2827		none	Oxidoreduction	0	0		IPR002198: Short-chain dehydrogenase/reductase SDR	adh_short
Bcin01g00260	10.2364	14.4575	12.299		none	Other CAZY	AA4	0		IPR004113: FAD-linked oxidase, C-terminal
Bcin01g00400			0.0168039		none	Oxidoreduction	0	0	L-lactate dehydrogenase (cytochrome) [EC:1.1.2.3] Pyruvate metabolism	IPR000262: FMN-dependent dehydrogenase
Bcin01g00440			41.6201		none	Lipid metabolism	0	0	fatty acid synthase subunit alpha, fungi type [EC:2.3.1.86] Fatty acid biosynthesis / metabolism	IPR001227: Acyl transferase domain
Bcin01g00450			92.1476		none	Lipid metabolism	0	0	fatty acid synthase subunit beta, fungi type [EC:2.3.1.86] Fatty acid biosynthesis / metabolism	IPR001227: Acyl transferase domain
Bcin01g00470			7.30338		none	Traffic	0	0	synaptobrevin homolog YKT6 SNARE interaction / Autophagy	IPR001388: Synaptobrevin
Bcin01g00550			124.611		none	Traffic	0	0	Ras-related protein Rab-8A Endocytosis	IPR001806: Small GTPase superfamily
Bcin01g00670	8.99887	15.9463		6.92126	none	Protein synthesis	0	0	translation initiation factor 2 subunit 1	IPR003029: Ribosomal protein S1, RNA-binding domain
Bcin01g00800			0.0154411	0.361887	SignalP-noTM	Oxidoreduction (Laccase)	AA1	0		IPR001117: Multicopper oxidase, type 1
Bcin01g00880			8.96659		none	Metabolism	0	0	thiosulfate/3-mercaptopyruvate sulfurtransferase [EC:2.8.1.1 2.8.1.2] Multiple pathways	IPR001763: Rhodanese-like domain
Bcin01g00900	0.281606	0.277265	0.221187		SignalP-TM	Unknown	0	0		IPR029058: Alpha/Beta hydrolase fold	Abhydrolase_6
Bcin01g00980			29.6268	2.19413	none	Protein synthesis	0	0	small subunit ribosomal protein S2e	IPR018192: Ribosomal protein S5, N-terminal, conserved site
Bcin01g01190			14.1265	3.31003	SignalP-noTM	Protease	0	Yes		IPR001461: Aspartic peptidase
Bcin01g01470			0.000169403		SignalP-noTM	Unknown	0	0		None	None
Bcin01g01480			-Infinity		SignalP-noTM	Unknown	0	0		None	Pfam: TraF_2
Bcin01g01630			3.6544		none	Oxidoreduction	0	0		IPR001128: Cytochrome P450	p450 Oxidoreductase
Bcin01g01670			8.11173		none	Unknown	0	0		None	None
Bcin01g01760			0.13429		SignalP-noTM	FCWE Chitin metabolism	GH18	0		IPR013781: Glycoside hydrolase, catalytic domain
Bcin01g02090			17.163		none	Metabolism	0	0	phosphoribosylaminoimidazole-succinocarboxamide synthase [EC:6.3.2.6] Multiple pathways	IPR001636: Phosphoribosylaminoimidazole-succinocarboxamide synthase
Bcin01g02160			0.0941259		none	Cytoskeleton	0	0		IPR002558: I/LWEQ domain
Bcin01g02200			4.59911		none	Protein synthesis	0	0	small subunit ribosomal protein S9e	IPR001912: Ribosomal protein S4/S9, N-terminal
Bcin01g02210			8.44011		none	Protein synthesis	0	0	large subunit ribosomal protein L21e	IPR001147: Ribosomal protein L21e
Bcin01g02320			0.0347617		SignalP-noTM	Lipid metabolism	0	0		IPR002642: Lysophospholipase, catalytic domain
Bcin01g02460	4.45624	4.32397	2.84287	9.18105	SignalP-noTM	Other CAZy	CBM63	0		IPR009009: RlpA-like double-psi beta-barrel domain
Bcin01g02630			5.82198		none	Unknown	0	0		IPR000504: RNA recognition motif domain
Bcin01g02670			16307.2		none	Protein homeostasis	0	0	T-complex protein 1 subunit beta	IPR002194: Chaperonin TCP-1, conserved site
Bcin01g02680			12.3738		none	Protein synthesis	0	0	translation initiation factor 3 subunit B RNA transport	IPR000504: RNA recognition motif domain
Bcin01g02690			0.0409308		SignalP-noTM	Protease	0	Yes		IPR008758: Peptidase S28
Bcin01g02880			13.1138		none	Oxidoreduction	0	0	alcohol dehydrogenase, propanol-preferring [EC:1.1.1.1] sugar, lipid, aa metabolism	IPR002085: Alcohol dehydrogenase superfamily, zinc-type
Bcin01g02900	39.6862	128.366		37.7438	none	Metabolism	0	0		IPR013149: Alcohol dehydrogenase, C-terminal	ADH_zinc_N
Bcin01g02910			0.211243		none	Metabolism	0	0		IPR000560: Histidine phosphatase superfamily, clade-2	His_Phos_2
Bcin01g03000			0.401704		none	Metabolism	0	0	inorganic pyrophosphatase [EC:3.6.1.1] Oxidative phosphorylation	IPR008162: Inorganic pyrophosphatase	Pyrophosphatase
Bcin01g03080			58.0398		none	Unknown	0	0		None	DUF900
Bcin01g03110			24.0431		none	DNA / RNA metabolism	0	0	pre-mRNA-processing factor 39	IPR003107: HAT (Half-A-TPR) repeat
Bcin01g03210			9.75586		SignalP-noTM	FCWE Glucan metabolism	GH71	0		IPR005197: Glycoside hydrolase, family 71
Bcin01g03390			8.702		none	Other CAZY	GH38	0		IPR000602: Glycoside hydrolase family 38, N-terminal domain
Bcin01g03440			14.5426		none	Protein synthesis	0	0	valyl-tRNA synthetase [EC:6.1.1.9]	IPR001412: Aminoacyl-tRNA synthetase, class I, conserved site
Bcin01g03470	2.94598		51.8555		none	Lipid metabolism / Sterol	0	0		IPR000648: Oxysterol-binding protein	Oxysterol_BP
Bcin01g03530			0.00629391		none	Unknown	0	0		None	None
Bcin01g03540	0.00289452	0.00721334	0.0335825	0.0076647	none	Unknown	0	0		None	None
Bcin01g03640	5.5036	7.64124	16.7787		none	Metabolism	0	0	UTP--glucose-1-phosphate uridylyltransferase [EC:2.7.7.9] Multiple pathways	IPR002618: UTP--glucose-1-phosphate uridylyltransferase family
Bcin01g03770		87.7485		57.834	none	Unknown	0	0		IPR016181: Acyl-CoA N-acyltransferase	Acetyltransf_1
Bcin01g03820	26.4278	27.0117	238.552	33.4717	SignalP-noTM	FCWE Glucan metabolism	GH17	0		IPR013781: Glycoside hydrolase, catalytic domain
Bcin01g04340			20.0511		none	Metabolism	0	0	sulfate adenylyltransferase [EC:2.7.7.4] Multiple pathways	IPR002650: Sulphate adenylyltransferase
Bcin01g04420			9.32302		none	Metabolism	0	0		IPR000873: AMP-dependent synthetase/ligase	AMP-binding
Bcin01g04440			4.05946		none	Cytoskeleton	0	0	actin-related protein 4	IPR004000: Actin-related protein
Bcin01g04530	0.0102151	0.00660381	0.0247071	0.0117691	SignalP-noTM	Metabolism	0	0		IPR000073: Alpha/beta hydrolase fold-1	Pfam: Abhydrolase_1
Bcin01g04890			128.216		none	Oxidoreduction	0	0		IPR001128: Cytochrome P450	p450
Bcin01g04900	6.9935	8.18351		5.12399	none	Metabolism	0	0		IPR004046: Glutathione S-transferase, C-terminal
Bcin01g05280	0.0331011	0.017997	0.00980702	0.0467357	SignalP-noTM	Lipid metabolism	0	0		IPR002018: Carboxylesterase, type B	Pfam: COesterase
Bcin01g05430		6.61054	36.6575		none	Protein synthesis	0	0	phenylalanyl-tRNA synthetase alpha chain [EC:6.1.1.20]	IPR002319: Phenylalanyl-tRNA synthetase
Bcin01g05550			5.5377	2.62859	none	Metabolism	0	0	carbamoyl-phosphate synthase large subunit [EC:6.3.5.5] Pyrimidine, Alanine, aspartate and glutamate metabolism	IPR005479: Carbamoyl-phosphate synthetase large subunit-like, ATP-binding domain
Bcin01g05590	2.05127		163.513		none	Unknown	0	0		IPR000629: RNA helicase, ATP-dependent, DEAD-box, conserved site
Bcin01g05680	0.108166		0.0432321	0.0465167	SignalP-noTM	Other CAZy	GH47	0		IPR001382: Glycoside hydrolase, family 47
Bcin01g05690			0.0133825		none	Unknown	0	0		None	Zn_clus
Bcin01g05720	0.099145	0.109586	0.16606		SignalP-noTM	FCWE	0	0		IPR011330: Glycoside hydrolase/deacetylase, beta/alpha-barrel	Pfam: Polysacc_deac_1
Bcin01g05790	55.8531	11.5559		96.0691	none	Oxidoreduction	0	0		IPR001327: Pyridine nucleotide-disulphide oxidoreductase, NAD-binding domain	Pyr_redox_2
Bcin01g06010	0.236204	0.308926	0.283556	0.389358	SignalP-noTM	FCWE Chitin metabolism	GH16	0		IPR000757: Glycoside hydrolase, family 16
Bcin01g06060	0.0347192	0.0139695	0.00763331	0.0263148	SignalP-noTM	Unknown	0	0		None	None
Bcin01g06150	13.38		24.2079		none	Cytoskeleton	0	0	actin related protein 2/3 complex, subunit 1A/1B	IPR001680: WD40 repeat
Bcin01g06210	0.012261	0.0205284	0.0131979	0.0190612	SignalP-noTM	Protease	0	Yes		IPR001563: Peptidase S10, serine carboxypeptidase
Bcin01g06220			19.1933	4.85585	none	Signaling	0	0	GTP-binding nuclear protein Ran Ribosome biogenesis, RNA transport	IPR001806: Small GTPase superfamily	Ras
Bcin01g06260			113.888		none	Signaling	0	0		IPR001789: Signal transduction response regulator, receiver domain	HAMP
Bcin01g06440			Infinity		none	Protein synthesis	0	0	translation initiation factor 3 subunit J	IPR013906: Eukaryotic translation initiation factor 3 subunit J
Bcin01g06450	3.3784	4.17536	39.6043	4.27559	none	Metabolism	0	0	enolase [EC:4.2.1.11] Multiple pathways	IPR000941: Enolase	Enolase_C
Bcin01g06460	3.30505				none	Protein homeostasis	0	0	26S proteasome regulatory subunit T4	IPR003593: AAA+ ATPase domain
Bcin01g06470	2.73668	2.12795	58.3657		none	Metabolism	0	0	glutamine---fructose-6-phosphate transaminase (isomerizing) [EC:2.6.1.16] Multiple pathways	IPR000583: Class II glutamine amidotransferase domain
Bcin01g06790			0.0141135		SignalP-noTM	PCWDE_HP	CE12	0		IPR001087: Lipase, GDSL
Bcin01g06800			28.902		none	Metabolism	0	0	3-deoxy-7-phosphoheptulonate synthase [EC:2.5.1.54] Multiple pathways	IPR002480: DAHP synthetase, class II
Bcin01g06900	0.291391	0.38174	0.28806		SignalP-noTM	Transport	0	0		IPR009486: Purine nucleoside permease
Bcin01g07070			4.08863		none	Metabolism	0	0	glucose-6-phosphate 1-epimerase [EC:5.1.3.15] Multiple pathways	IPR008183: Aldose 1-/Glucose-6-phosphate 1-epimerase
Bcin01g07210			0.0418077		SignalP-noTM	Other CAZy	GH92	0		IPR005887: Alpha-1,2-mannosidase, putative
Bcin01g07230	0.00728991	0.00529206	0.00369439	0.00883328	none	Lipid metabolism	0	0		IPR006823: Neutral/alkaline nonlysosomal ceramidase	Ceramidase_alk
Bcin01g07250	0.0112042	0.0128471	0.0173421	0.016268	none	Pectin degradation	GH28	0	galacturan 1,4-alpha-galacturonidase [EC:3.2.1.67] Pentose and glucuronate interconversions	IPR011050: Pectin lyase fold/virulence factor
Bcin01g07320			529504		SignalP-noTM	Unknown	0	0		None	None
Bcin01g07510			Infinity		SignalP-TM	Protein homeostasis	0	0		IPR001623: DnaJ domain
Bcin01g07530	0.0171409	0.0179258	0.0267078	0.0200439	SignalP-noTM	Other CAZy	GH125	0		IPR008313: Uncharacterised conserved protein UCP028846
Bcin01g07880	11.1688	18.8449	17.7401	13.9543	none	Unknown	0	0		IPR000504: RNA recognition motif domain	RRM_1
Bcin01g08000	6.5409	5.81011		6.29984	none	Unknown	0	0		IPR001279: Beta-lactamase-like	Lactamase_B
Bcin01g08040	2.80767		54.2472		none	Cytoskeleton	0	0	tubulin beta	IPR000217: Tubulin
Bcin01g08110	0.00411088	0.00510008	0.00631625	0.00700339	SignalP-noTM	Hemicellulose degradation	GH27, CBM13	0		IPR000111: Glycoside hydrolase, clan GH-D
Bcin01g08160			0.0378126		none	Unknown	0	0		None	Bacillus_HBL Bacillus haemolytic enterotoxin
Bcin01g08260	0.00681001				none	Metabolism	0	0	6,7-dimethyl-8-ribityllumazine synthase [EC:2.5.1.78] Multiple pathways	IPR002180: 6,7-dimethyl-8-ribityllumazine synthase
Bcin01g08320			8.73329		SignalP-noTM	Protein homeostasis	0	0		IPR001580: Calreticulin/calnexin
Bcin01g08350			12.5236		none	Metabolism	0	0		IPR002638: Quinolinate phosphoribosyl transferase, C-terminal	NAPRTase
Bcin01g08520	6.68356	6.81251		8.10976	none	Oxidoreduction	0	0		IPR000866: Alkyl hydroperoxide reductase subunit C/ Thiol specific antioxidant	AhpC-TSA
Bcin01g08910	0.0386836	0.0382456	0.0311373	0.0366323	SignalP-noTM	Hemicellulose degradation	CE16	0		IPR013830: SGNH hydrolase-type esterase domain
Bcin01g08970	18.3911	17.0089	8.30202	16.9452	SignalP-noTM	Unknown	0	0		IPR010308: TRP-like family	Pfam: TRP TRP_N
Bcin01g09310	3.64887	4.88161	8.89975	3.45525	none	Signaling	0	0	14-3-3 protein epsilon MAPK signaling pathway - yeast	IPR000308: 14-3-3 protein	14-3-3
Bcin01g09390	9.9215	9.93737	11.0572	8.55289	none	Other CAZY	GH128	0		IPR002889: Carbohydrate-binding WSC
Bcin01g09430	0.000254225	0.0003894	0.00392966	0.00102546	SignalP-noTM	Cuticle degradation	CE5	0		IPR000675: Cutinase
Bcin01g09580	16.7878		7.04003	10.3268	none	Metabolism	0	0	phosphoribosylaminoimidazolecarboxamide formyltransferase / IMP cyclohydrolase [EC:2.1.2.3 3.5.4.10] Multiple pathways	IPR002695: AICARFT/IMPCHase bienzyme
Bcin01g09620			42.7359		none	Protein synthesis	0	0	large subunit ribosomal protein L11e	IPR002132: Ribosomal protein L5
Bcin01g09840			2.24115		none	Oxidoreduction	0	0		IPR005746: Thioredoxin	PITH
Bcin01g09940			35.6373		none	Traffic	0	0	clathrin heavy chain Endocytosis	IPR000547: Clathrin, heavy chain/VPS, 7-fold repeat
Bcin01g10100			35.1455		none	Metabolism	0	0	pyruvate kinase [EC:2.7.1.40] Multiple pathways	IPR001697: Pyruvate kinase
Bcin01g10130	0.0585171	0.061807		0.0575744	none	Protease	0	0		IPR001261: ArgE/DapE/ACY1/CPG2/YscS, conserved site	Peptidase_M20
Bcin01g10140	0.138075		0.0168229	0.0733327	none	Oxidoreduction	0	0		IPR012349: FMN-binding split barrel	Pyridox_ox_2
Bcin01g10150	0.0254974	0.0205573	0.0246031	0.0232765	none	Lipid metabolism Virulence factor	0	0		IPR003817: Phosphatidylserine decarboxylase-related	PS_Dcarbxylase
Bcin01g10310			9.9292		none	Other CAZY	GH13, GH133	0		IPR006421: Glycogen debranching enzyme, metazoa
Bcin01g10320			3.22692		none	Oxidoreduction	0	0	glycerol-3-phosphate dehydrogenase (NAD+) [EC:1.1.1.8] Glycerophospholipid, secondary metabolites, MAPK signaling (yeast)	IPR006109: Glycerol-3-phosphate dehydrogenase, NAD-dependent, C-terminal
Bcin01g10580	0.0364812	0.0176416		0.0160768	none	Unknown	0	0		None	PBP_like_2
Bcin01g10610			96.706		none	DNA / RNA metabolism	0	0	DNA replication licensing factor MCM7 [EC:3.6.4.12] DNA replication / Cell cycle / Meiosis	IPR001208: Mini-chromosome maintenance, DNA-dependent ATPase
Bcin01g10660	5.54129	7.20083	5.4502		none	traffic	0	0	protein transport protein SEC13 RNA transport / Protein processing in ER	IPR001680: WD40 repeat
Bcin01g10850			7.81705		SignalP-noTM	Unknown	0	0		None	None
Bcin01g10980			21.4758		none	Protein homeostasis	0	0	26S proteasome regulatory subunit N2	IPR011989: Armadillo-like helical
Bcin01g11040			18.5264		SignalP-TM	Pectin degradation	GH78	0		IPR008902: Bacterial alpha-L-rhamnosidase
Bcin01g11150	0.0304708	0.0324144	0.0553566	0.042565	SignalP-TM	Pectin degradation	CE8	0		IPR000070: Pectinesterase, catalytic
Bcin01g11160	0.0551307	0.0363524	0.0986171	0.0782342	SignalP-noTM	Pectin degradation	GH28	0		IPR000743: Glycoside hydrolase, family 28
Bcin01g11170			Infinity		SignalP-noTM	Protease	0	Yes		IPR007484: Peptidase M28	Pfam: Peptidase_M28
Bcin01g11220	0.0182918	0.0303696	0.00512493	0.0240209	SignalP-noTM	FCWE Glucan metabolism	GH17	0		IPR000490: Glycoside hydrolase, family 17
Bcin01g11290	8.54024	8.53523	8.64309	8.38548	SignalP-noTM	FCWE	GH76	0		IPR012341: Six-hairpin glycosidase
Bcin01g11310	0.096736	0.0891967	0.132984	0.189332	none	Other CAZY	AA3	0		IPR000172: Glucose-methanol-choline oxidoreductase, N-terminal	GMC_oxred_N
Bcin02g00120			673.437		none	Protein synthesis	0	0	cysteinyl-tRNA synthetase [EC:6.1.1.16]	IPR009080: Aminoacyl-tRNA synthetase, class 1a, anticodon-binding
Bcin02g00210			0.0539225		SignalP-noTM	Lipid metabolism	0	0		IPR002018: Carboxylesterase, type B	Pfam: COesterase
Bcin02g00220	0.00297395	0.0142623	0.0461487	0.0264768	none	Oxidoreduction	0	0		IPR006094: FAD linked oxidase, N-terminal	FAD_binding_4
Bcin02g00270			0.107387		none	Unknown	0	0		IPR009799: EthD domain	EthD
Bcin02g00420	0.0417119	0.0394867	0.0127287	0.0373652	SignalP-noTM	Other CAZy	GH3	0		IPR001764: Glycoside hydrolase, family 3, N-terminal
Bcin02g00540	8.01825	5.94503		9.61077	none	Unknown	0	0		IPR013094: Alpha/beta hydrolase fold-3	Abhydrolase_3
Bcin02g00660			191.421		none	Unknown	0	0	suppressor of G2 allele of SKP1	IPR007052: CS domain
Bcin02g00900	2.45144		27.1344		none	Cytoskeleton	0	0	tubulin alpha	IPR000217: Tubulin
Bcin02g00910	8.50662	13.1731	116.438		none	Traffic	0	0	epidermal growth factor receptor substrate 15 Endocytosis	IPR000261: EPS15 homology (EH)
Bcin02g01020		13.1829		11.7744	none	Metabolism	0	0		IPR012469: Protein of unknown function DUF1688	DUF1688
Bcin02g01070	14.258			9.59942	SignalP-noTM	Hemicellulose degradation	GH31	0		IPR011013: Galactose mutarotase-like domain
Bcin02g01390			18.7614		none	Unknown	0	0		IPR000504: RNA recognition motif domain	zf-RanBP
Bcin02g01420	0.00148904	0.00151627	0.00392063	0.00206666	SignalP-noTM	Other CAZy	GH13	0		IPR006047: Glycosyl hydrolase, family 13, catalytic domain
Bcin02g01540			9.29193		none	Signaling	0	0	serine/threonine-protein phosphatase 2B catalytic subunit [EC:3.1.3.16]	IPR006186: Serine/threonine-specific protein phosphatase/bis(5-nucleosyl)-tetraphosphatase	Metallophos
Bcin02g01690			7.60026		SignalP-TM	Lipid metabolism	0	0		IPR029058: Alpha/Beta hydrolase fold	Abhydrolase_6
Bcin02g01720			2.94844		none	Lipid metabolism	0	0	phospholipase D1/2 [EC:3.1.4.4] Multiple pathways	IPR001736: Phospholipase D/Transphosphatidylase
Bcin02g01790	9.35359	16.1999	37.5888	9.0924	none	Cytoskeleton	0	0		IPR000217: Tubulin
Bcin02g01920			14.2613		none	Protein homeostasis	0	0	T-complex protein 1 subunit delta	IPR002194: Chaperonin TCP-1, conserved site
Bcin02g01930			45.2206		none	Protein homeostasis	0	0	26S proteasome regulatory subunit T1	IPR003593: AAA+ ATPase domain
Bcin02g01960	11.0378	9.08216		8.05726	SignalP-noTM	Cellulose degradation	GH45, CBM1	0		IPR000254: Cellulose-binding domain, fungal
Bcin02g02520			4.88108		none	Oxidoreduction	0	0	ubiquinol-cytochrome c reductase core subunit2 Oxidative phosphorylation	IPR007863: Peptidase M16, C-terminal domain
Bcin02g02600	15.4145	23.3514	52.1449	10.6402	none	Protein homeostasis	0	0	26S proteasome regulatory subunit N8	IPR000555: JAB1/MPN/MOV34 metalloenzyme domain
Bcin02g02610			6.08585		none	Metabolism	0	0	adenylate kinase [EC:2.7.4.3] Multiple pathways	IPR000850: Adenylate kinase/UMP-CMP kinase	ADK
Bcin02g02630			41.3302		none	Traffic	0	0	dynamin 1-like protein [EC:3.6.5.5] Mitophagy - yeast	IPR000375: Dynamin central domain
Bcin02g02750			2.94207		none	Metabolism	0	0	citrate synthase [EC:2.3.3.1] Multiple pathways	IPR002020: Citrate synthase-like
Bcin02g02910			6.67781		none	Metabolism	0	0		IPR006003: Carbohydrate kinase, FGGY-related	FGGY_C
Bcin02g03090	0.0155415	0.0132861	0.0168881	0.017964	SignalP-noTM	Other CAZy	GH1	0		IPR001360: Glycoside hydrolase, family 1
Bcin02g03670			70.552		none	Oxidoreduction	0	0		IPR002198: Short-chain dehydrogenase/reductase SDR	adh_short
Bcin02g03860	0.0490498	0.0317977	0.0421283	0.0904396	none	Unknown	0	0		IPR002018: Carboxylesterase, type B	COesterase
Bcin02g03870			129.91		none	Unknown	0	0		IPR018535: Domain of unknown function DUF1996
Bcin02g03880	76.7241	49.8342	62.7454		none	Unknown	0	0		IPR000629: RNA helicase, ATP-dependent, DEAD-box, conserved site
Bcin02g03980			Infinity		none	Protein homeostasis	0	0	COP9 signalosome complex subunit 4	IPR000717: Proteasome component (PCI) domain
Bcin02g04220			95.2423		none	Protein synthesis	0	0	large subunit ribosomal protein L4e	IPR002136: Ribosomal protein L4/L1e
Bcin02g04320			0.303445		SignalP-noTM	Unknown	0	0		None	None
Bcin02g04400			8.21496		SignalP-noTM	Unknown	0	0		IPR002889: Carbohydrate-binding WSC
Bcin02g04510			25.311		none	Oxidoreduction	0	0		IPR000415: Nitroreductase-like	Nitroreductase
Bcin02g04550	0.00686543	0.00564805	0.0180543	0.00783278	SignalP-noTM	Unknown	0	0		None	Pfam: CarboxypepD_reg
Bcin02g04600			0.103823		none	Unknown	0	0		IPR009784: Protein of unknown function DUF1349	DUF1349
Bcin02g04640	18.0655		26.6577	6.5329	SignalP-noTM	Unknown	0	0		IPR018620: Ubiquitin 3 binding protein But2, C-terminal	Pfam: But2
Bcin02g04660	9.40234	10.0683	28.5543	9.04284	SignalP-TM	Unknown	0	0		None	But2
Bcin02g04690			0.00143277		none	Unknown	0	0		IPR000772: Ricin B lectin domain	RicinB_lectin_2
Bcin02g04760	2.81087	2.74755			none	Transport	0	0		IPR001140: ABC transporter, transmembrane domain	ABC_tran
Bcin02g04800	0.0104613	0.00734913	0.00118003	0.00890803	SignalP-noTM	Protease	0	Yes		IPR000834: Peptidase M14, carboxypeptidase A
Bcin02g05070			60.7744		none	Traffic	0	0	protein transport protein SEC24 Protein processing in ER	IPR002035: von Willebrand factor, type A
Bcin02g05100	19.2815	29.1707	17.0453	18.1209	none	Oxidoreduction	0	0	primary-amine oxidase [EC:1.4.3.21] AA metabolism	IPR000269: Copper amine oxidase
Bcin02g05260	11.045	18.2532	35.5815	11.5423	none	Traffic	0	0	coatomer subunit alpha	IPR001680: WD40 repeat
Bcin02g05270	14.0228		4.88165	7.25694	SignalP-noTM	Other CAZy	GT24	0		IPR009448: UDP-glucose:Glycoprotein Glucosyltransferase
Bcin02g05600			0.0497729		SignalP-noTM	Unknown	0	0		None	None
Bcin02g05860			0.011213		SignalP-noTM	Pectin degradation	GH28	0		IPR000743: Glycoside hydrolase, family 28
Bcin02g05920			12.9128	3.26675	none	Metabolism Virulence factor	0	0	aconitate hydratase [EC:4.2.1.3] Multiple pathwatys	IPR000573: Aconitase A/isopropylmalate dehydratase small subunit, swivel
Bcin02g06020			7.37335		none	Unknown	0	0		IPR007681: Ran-interacting Mog1 protein	Mog1
Bcin02g06060		0.244568			none	Protein synthesis	0	0		IPR000892: Ribosomal protein S26e	Ribosomal_S26e
Bcin02g06270			4.33866		none	Metabolism	0	0	2,3-bisphosphoglycerate-independent phosphoglycerate mutase [EC:5.4.2.12] Multiple pathways	IPR005995: Phosphoglycerate mutase, 2,3-bisphosphoglycerate-independent
Bcin02g06290	233.902	274.063	5.27836		none	Metabolism	0	0		IPR000873: AMP-dependent synthetase/ligase	AMP-binding
Bcin02g06400			9.39158		none	Metabolism	0	0	dihydrolipoamide dehydrogenase [EC:1.8.1.4] Multiple pathways	IPR001327: Pyridine nucleotide-disulphide oxidoreductase, NAD-binding domain
Bcin02g06640			81.289		none	Protein synthesis	0	0	threonyl-tRNA synthetase [EC:6.1.1.3]	IPR002314: Aminoacyl-tRNA synthetase, class II (G/ H/ P/ S), conserved domain
Bcin02g06790			4.08261		none	DNA / RNA metabolism	0	0	histone H2B	IPR000558: Histone H2B
Bcin02g06860			4.40157		none	Metabolism	0	0		IPR004304: Acetamidase/Formamidase
Bcin02g06910	30.396	28.437	33.6702	46.7531	SignalP-noTM	FCWE Glucan metabolism	GH17	0		IPR000490: Glycoside hydrolase, family 17
Bcin02g07070	7.48827	8.90645	60.9662	8.39785	SignalP-noTM	Unknown	0	0		None	Pfam: Baculo_PEP_C
Bcin02g07080	0.169279	0.125973			SignalP-noTM	Other CAZy	AA3	0		IPR000172: Glucose-methanol-choline oxidoreductase, N-terminal
Bcin02g07100	0.00596836	0.00791696	0.00259483	0.00683762	SignalP-noTM	PCWDE_HP	CE12	0		IPR013831: SGNH hydrolase-type esterase domain
Bcin02g07150			15.5623		none	Protein homeostasis	0	0	T-complex protein 1 subunit eta	IPR002194: Chaperonin TCP-1, conserved site
Bcin02g07210	16.1526	13.6716		17.9872	none	Metabolism	0	0	aldose 1-epimerase [EC:5.1.3.3] Multiple pathways	IPR008183: Aldose 1-/Glucose-6-phosphate 1-epimerase
Bcin02g07230	4.70865		290.541		SignalP-noTM	FCWE Glucan metabolism	GH16	0		IPR000757: Glycoside hydrolase, family 16
Bcin02g07410	8.63276	15.2256	34.6591	6.13051	none	Transport	0	0	importin-5	IPR011989: Armadillo-like helical
Bcin02g07520	0.142742	0.165798	0.227267	0.211837	SignalP-noTM	Hemicellulose degradation	GH26, CBM35	0		IPR000805: Glycoside hydrolase, family 26
Bcin02g07620			0.18719		SignalP-TM	Lipid metabolism / Sterol	0	0		IPR000997: Cholinesterase
Bcin02g07630	0.00348085	0.00434845	0.257524	0.0180042	SignalP-noTM	Unknown	0	0		None	None
Bcin02g07640	0.0496424	0.0636312	0.120768	0.0934859	SignalP-noTM	Oxidoreduction (Laccase)	AA1	0		IPR001117: Multicopper oxidase, type 1
Bcin02g07790	21.9594	38.6798	288.095	32.8363	none	Unknown	0	0		IPR002889: Carbohydrate-binding WSC	WSC
Bcin02g08170			13.4751		none	Signaling	0	0	mitogen-activated protein kinase 1/3 [EC:2.7.11.24]	IPR000719: Protein kinase domain
Bcin02g08180			7725.74		none	Traffic	0	0		IPR002553: Clathrin/coatomer adaptor, adaptin-like, N-terminal	Adaptin_N
Bcin02g08230	0.407149	0.440623	0.407574		SignalP-noTM	Lipid metabolism	0	0		IPR002018: Carboxylesterase, type B	Pfam: COesterase
Bcin02g08260			13.8584		none	Protein synthesis	0	0	translation initiation factor 3 subunit E RNA transport	IPR000717: Proteasome component (PCI) domain
Bcin02g08330	20.0623	42.7246	35.0831	20.5597	none	Traffic	0	0	protein transport protein SEC24 Protein processing in ER	IPR002035: von Willebrand factor, type A
Bcin02g08340	16.6505	35.34	265.321		none	Metabolism	GT20	0	trehalose 6-phosphate synthase [EC:2.4.1.15 2.4.1.347] Starch and sucrose metabolism	IPR001830: Glycosyl transferase, family 20
Bcin02g08380	0.050291	0.0523578	0.0819754	0.0842347	SignalP-noTM	PCWDE_HP	GH93	0		IPR011040: Sialidases
Bcin02g08590	0.218973		0.24344	0.218404	SignalP-noTM	Protease	0	Yes		IPR001461: Aspartic peptidase
Bcin02g08600			6.077		none	Metabolism	0	0	glycine hydroxymethyltransferase [EC:2.1.2.1] Multiple pathways	IPR001085: Serine hydroxymethyltransferase
Bcin02g08690			153.956		none	Protein homeostasis	0	0	26S proteasome regulatory subunit T3	IPR001270: ClpA/B family
Bcin02g09160			2.23846		none	Traffic	0	0	ADP-ribosylation factor-binding protein GGA	IPR002014: VHS
Bcin02g09290				24.0632	none	DNA / RNA metabolism	0	0	histone chaperone ASF1	IPR006818: Histone chaperone, ASF1-like
Bcin02g09370			0.186314		none	Unknown	0	0		IPR000008: C2 domain	SMP_LBD
Bcin03g00005	0.0222789	0.0185177	0.0147055		none	Unknown	0	0		IPR009413: Hemolysin, aegerolysin type	Aegerolysin
Bcin03g00010	0.00585517		0.0619244		none	Unknown	0	0		None	None
Bcin03g00280			0.106364		SignalP-noTM	Pectin degradation	PL1	0	pectin lyase [EC:4.2.2.10] Not Included in Pathway	IPR002022: Pectate lyase/Amb allergen	Pfam: Pec_lyase_C
Bcin03g00290	0.0182179	0.0196149	0.0306661	0.0481028	SignalP-noTM	Lipid metabolism	0	0		IPR004843: Calcineurin-like phosphoesterase domain, apaH type	Pfam: Metallophos
Bcin03g00340			14.1881		SignalP-noTM	Unknown	0	0		None	None
Bcin03g00380	0.162103	0.218368	0.114376	0.263223	SignalP-noTM	Oxidoreduction	0	0		IPR006094: FAD linked oxidase, N-terminal	Pfam: FAD_binding_4
Bcin03g00480	0.00536081	0.00665243	0.00195286	0.0105728	SignalP-noTM	Hemicellulose degradation	GH11	0		IPR018208: Glycoside hydrolase, family 11, active site
Bcin03g00500	0.0146553	0.0287124	0.00918411	0.0310645	SignalP-noTM	Stress & virulence factor	0	0		IPR009009: RlpA-like double-psi beta-barrel domain	Pfam: Cerato-platanin phytotoxic proteins
Bcin03g00590			51.0236		none	Protein synthesis	0	0	small subunit ribosomal protein S5e	IPR000235: Ribosomal protein S5/S7
Bcin03g00640	35.5865	52.8373	99.1917		none	Other CAZY	AA3	0	alcohol oxidase [EC:1.1.3.13] Carbon and Methane metabolism	IPR000172: Glucose-methanol-choline oxidoreductase, N-terminal
Bcin03g00680			371.512		SignalP-noTM	Unknown	0	0		None	None
Bcin03g00700		27.9849			none	Oxidoreduction	0	0		IPR008030: NmrA-like domain	NmrA
Bcin03g01030	2.37665				none	Transport	0	0	solute carrier family 25 (mitochondrial phosphate transporter), member 3	IPR002067: Mitochondrial carrier protein
Bcin03g01130			9.07799		none	Oxidoreduction	0	0		IPR015590: Aldehyde dehydrogenase domain	Aldedh
Bcin03g01250	0.00961784	0.0120825	0.00231528	0.0116493	SignalP-noTM	Unknown	0	0		None	Pfam: PAN_1
Bcin03g01440	0.00064636	0.0050137	0.0207855	0.00317402	SignalP-noTM	Hemicellulose degradation	GH5.7, CBM1	0		IPR001547: Glycoside hydrolase, family 5
Bcin03g01490	5.66439	12.0181		5.07406	none	Metabolism	0	0		IPR002220: DapA-like
Bcin03g01520		9.54805	12.2948	5.91664	none	Oxidoreduction	0	0		IPR002085: Alcohol dehydrogenase superfamily, zinc-type	ADH_N
Bcin03g01540	0.0142161	0.0137511	0.0175814	0.0264548	SignalP-noTM	Other CAZy	AA3	0		IPR000172: Glucose-methanol-choline oxidoreductase, N-terminal
Bcin03g01580			0.118659		SignalP-noTM	Lipid metabolism	0	0		IPR002018: Carboxylesterase, type B	Pfam: COesterase
Bcin03g01610			0.0190338	0.120719	none	Hemicellulose degradation	GH26	0		IPR013781: Glycoside hydrolase, catalytic domain
Bcin03g01680			0.0838854		SignalP-noTM	Pectin degradation	GH28	0		IPR000743: Glycoside hydrolase, family 28
Bcin03g01720			591.666		none	Signaling	0	0	protein phosphatase PTC1 [EC:3.1.3.16] MAPK signaling pathway - yeast	IPR000222: Protein phosphatase 2C, manganese/magnesium aspartate binding site	PP2C
Bcin03g01820			9.46943		none	Protein synthesis	0	0	large subunit ribosomal protein L10Ae	IPR002143: Ribosomal protein L1
Bcin03g01920		11.0634			none	Oxidoreduction	0	0	catalase [EC:1.11.1.6] multiple pathways	IPR002226: Catalase haem-binding site
Bcin03g02370			0.417476		TM	Unknown	0	0	receptor expression-enhancing protein 5/6	IPR004345: TB2/DP1/HVA22-related protein
Bcin03g02520			15.4475		none	Metabolism	0	0	adenosine kinase [EC:2.7.1.20] Purine metabolism	IPR001805: Adenosine kinase
Bcin03g02710		8.55078	9.49675		SignalP-noTM	Hemicellulose degradation	GH27	0		IPR000111: Glycoside hydrolase, clan GH-D
Bcin03g02940	2.11558		46.449		none	Protein synthesis	0	0	glycyl-tRNA synthetase [EC:6.1.1.14]	IPR002314: Aminoacyl-tRNA synthetase, class II (G/ H/ P/ S), conserved domain
Bcin03g02970	0.11286	0.101336	0.029239	0.122166	SignalP-noTM	FCWE Chitin metabolism	CE4, CBM18	0		IPR001002: Chitin-binding, type 1
Bcin03g03030			3.8961		none	Unknown	0	0		None	None
Bcin03g03060	18.2717	24.5137	103.072	19.4318	none	Metabolism	0	0	dTDP-glucose 4,6-dehydratase [EC:4.2.1.46]	IPR005888: dTDP-glucose 4,6-dehydratase
Bcin03g03300			11.6605		SignalP-noTM	Protease	0	Yes		IPR001461: Aspartic peptidase
Bcin03g03380	13.9666	28.524	27.8362	14.6995	none	Unknown	0	0	staphylococcal nuclease domain-containing protein 1	IPR002999: Tudor domain
Bcin03g03390			0.172262		none	Oxidoreduction	0	0	superoxide dismutase, Cu-Zn family [EC:1.15.1.1] Peroxisome	IPR001424: Superoxide dismutase, copper/zinc binding domain
Bcin03g03440			11.991		none	Unknown	0	0		IPR006439: HAD hydrolase, subfamily IA	HAD_2
Bcin03g03470			0.00113258		SignalP-TM	Unknown	0	0		None	Fungal_lectin
Bcin03g03480	0.0052635	0.00540397	0.00212412	0.00680425	SignalP-noTM	Hemicellulose degradation	GH10, CBM1	0		IPR001000: Glycoside hydrolase, family 10
Bcin03g03610	0.0338152	0.0169967	0.236619	0.0143182	none	Other CAZY	GH92	0		IPR005887: Alpha-1,2-mannosidase, putative
Bcin03g03630	0.0195829	0.0193183	0.00313437	0.0154054	SignalP-noTM	PCWDE_HC	GH12	0		IPR002594: Glycoside hydrolase, family 12
Bcin03g03830			2.35214	3.89167	SignalP-noTM	Pectin degradation	CE8	0		IPR000070: Pectinesterase, catalytic
Bcin03g03880	12.7736	19.2742	41.0676	15.9345	none	Protein homeostasis	0	0	phospholipase A-2-activating protein Protein processing in endoplasmic reticulum	IPR001680: WD40 repeat
Bcin03g03890			Infinity		none	Signaling	0	0	serine-threonine kinase receptor-associated protein	IPR001680: WD40 repeat
Bcin03g03940			17.9618		none	Metabolism	0	0	acetyl-CoA acyltransferase 1 [EC:2.3.1.16] Multiple pathways	IPR002155: Thiolase
Bcin03g04100			2.06211		SignalP-TM	Unknown	0	0		IPR010816: Heterokaryon incompatibility Het-C	Het-C
Bcin03g04810	2.46378	2.99655	31.0471		none	Unknown	0	0		IPR000504: RNA recognition motif domain
Bcin03g05030			3.86737		none	Unknown	0	0		None	None
Bcin03g05350			51.9266		none	Metabolism	0	0	homoserine kinase [EC:2.7.1.39] Multiple pathways	IPR000870: Homoserine kinase
Bcin03g05450	7.23361	8.45546	14.6343	9.02791	none	Oxidoreduction	0	0		IPR006094: FAD linked oxidase, N-terminal	FAD_binding_4
Bcin03g05600	0.0258474	0.012751	0.00777785	0.0302507	SignalP-noTM	Lipid metabolism	0	0	phospholipase C [EC:3.1.4.3] Multiple pathways	IPR007312: Phosphoesterase
Bcin03g05720			0.226568		SignalP-noTM	Unknown	0	0		None	None
Bcin03g05800	8.49813	11.0508	2.66105	26.2464	SignalP-noTM	Other CAZy	GH13	0		IPR006047: Glycosyl hydrolase, family 13, catalytic domain
Bcin03g05820	18.6155	15.4782	17.208	34.6112	SignalP-noTM	Pectin degradation	PL1	0		IPR002022: Pectate lyase/Amb allergen
Bcin03g06080			22.8641		none	Cytoskeleton	0	0	myosin V	IPR000048: IQ motif, EF-hand binding site
Bcin03g06200	27.2891	56.1757	17.5529		none	Metabolism	0	0		IPR000926: GTP cyclohydrolase II, RibA	GTP_CH_N
Bcin03g06230			0.0251331		none	Unknown	0	0		IPR022771: Wings apart-like protein	WAPL
Bcin03g06250	2.51977		19.0824		none	Protein synthesis	0	0	seryl-tRNA synthetase [EC:6.1.1.11]	IPR002314: Aminoacyl-tRNA synthetase, class II (G/ H/ P/ S), conserved domain
Bcin03g06390			163.875		none	Metabolism	0	0	mannose-1-phosphate guanylyltransferase [EC:2.7.7.13] Multiple pathways	IPR001451: Bacterial transferase hexapeptide repeat
Bcin03g06530	3.08332			3.40689	none	Protein synthesis	0	0	large subunit ribosomal protein L7Ae	IPR001921: Ribosomal protein L7A/L8
Bcin03g06600	2.48238		4.43747		none	Protein homeostasis	0	0	heat shock 70kDa protein 1/2/6/8	IPR013126: Heat shock protein 70 family
Bcin03g06730	75.1431	317.712	29.4952		none	Metabolism	0	0	guanosine-diphosphatase [EC:3.6.1.42] Not Included in Pathway	IPR000407: Nucleoside phosphatase GDA1/CD39	GDA1_CD39
Bcin03g06810			69.8561		none	Protein synthesis	0	0	translation initiation factor 4G	IPR003890: MIF4G-like, type 3
Bcin03g06930	0.0264789	0.0226159	0.00357325	0.0183421	SignalP-noTM	Unknown	0	0		None	Pfam: DUF3309
Bcin03g06940			7.61506		none	Protein synthesis	0	0	translation initiation factor 3 subunit C RNA transport	IPR000717: Proteasome component (PCI) domain
Bcin03g06970			31.8264		none	Protein synthesis	0	0	small subunit ribosomal protein S14e	IPR001971: Ribosomal protein S11
Bcin03g07030			62.4864		none	Unknown	0	0	mRNA-binding protein PUF3 Mitochondrial biogenesis	IPR001313: Pumilio RNA-binding repeat	PUF
Bcin03g07120			4.16039		none	Protein synthesis	0	0	small subunit ribosomal protein S12e	IPR000530: Ribosomal protein S12e
Bcin03g07240			24.0198		none	Protein synthesis	0	0	elongation factor Tu	IPR000795: Elongation factor, GTP-binding domain
Bcin03g07250	9.35931	8.43495	50.5236		none	Unknown	0	0	cullin-associated NEDD8-dissociated protein 1	IPR011989: Armadillo-like helical
Bcin03g07320			0.000363282		SignalP-noTM	Unknown	0	0	ribonuclease T2 [EC:4.6.1.19] Transfer RNA biogenesis	IPR001568: Ribonuclease T2-like
Bcin03g07630			6.42929		none	Protein synthesis	0	0	large subunit ribosomal protein L7e	IPR005998: Ribosomal protein L7, eukaryotic
Bcin03g07660			9.13806		none	Metabolism	0	0		IPR015424: Pyridoxal phosphate-dependent transferase	Aminotran_5
Bcin03g07670	3717.83	6322.86	72.8174	3995.04	none	Oxidoreduction	0	0		IPR006096: Glutamate/phenylalanine/leucine/valine dehydrogenase, C-terminal	ELFV_dehydrog
Bcin03g07730			59.476		SignalP-noTM	Oxidoreduction	0	0		IPR002227: Tyrosinase copper-binding domain	Pfam: Tyrosinase
Bcin03g07910			9.31397		none	Metabolism	0	0	carnitine O-acetyltransferase [EC:2.3.1.7] Peroxisome	IPR000542: Acyltransferase ChoActase/COT/CPT
Bcin03g07960			726.548		none	DNA / RNA metabolism	0	0	DNA replication licensing factor MCM3 [EC:3.6.4.12] DNA replication / Cell cycle / Meiosis	IPR001208: Mini-chromosome maintenance, DNA-dependent ATPase
Bcin03g08150	29.259	80.7246			none	Signaling	0	0		IPR000014: PAS domain	PAS_9
Bcin03g08260	39.6931	51.3319	12.1397	57.194	SignalP-noTM	Oxidoreduction	0	0	protein disulfide-isomerase [EC:5.3.4.1] Protein processing in endoplasmic reticulum	IPR012336: Thioredoxin-like fold
Bcin03g08710			64.9875		SignalP-noTM	Other CAZy	GH3	0		IPR001764: Glycoside hydrolase, family 3, N-terminal
Bcin03g09000			50.868		none	Cytoskeleton	0	0	septin 7	IPR000038: Cell division protein GTP binding
Bcin03g09210	0.0299087	0.0370291	0.0192316	0.0738027	none	Unknown	0	0		IPR011048: Cytochrome cd1-nitrite reductase-like, haem d1 domain	Lactonase
Bcin03g09270			3.81957		none	Metabolism	0	0	serine/threonine-protein phosphatase 5 [EC:3.1.3.16]	IPR001440: Tetratricopeptide TPR1 IPR004843: Calcineurin-like phosphoesterase domain, apaH type	Metallophos
Bcin03g09280			11.9455		none	Oxidoreduction	0	0	saccharopine dehydrogenase (NADP+, L-glutamate forming) [EC:1.5.1.10] multiple pathways	IPR005097: Saccharopine dehydrogenase / Homospermidine synthase
Bcin04g00030			0.39119		none	Other CAZY	GH15	0		IPR000165: Glucoamylase
Bcin04g00140			11.0689		none	Oxidoreduction	0	0	L-2-aminoadipate reductase [EC:1.2.1.95] multiple pathways	IPR000873: AMP-dependent synthetase/ligase
Bcin04g00340			19.238	3.54618	none	Signaling	0	0	protein phosphatase PTC2/3 [EC:3.1.3.16]	IPR001932: Protein phosphatase 2C (PP2C)-like domain	PP2C
Bcin04g00420	15.2186	17.6686	20.1931	17.7938	SignalP-noTM	FCWE Glucan metabolism	GH71, CBM24	0		IPR005197: Glycoside hydrolase, family 71
Bcin04g00470	16.3545	26.1271	29.3028	24.6415	SignalP-noTM	Pectin degradation	PL3	0		IPR004898: Pectate lyase, catalytic
Bcin04g00520			7.40465		none	DNA / RNA metabolism	0	0	ATP-dependent RNA helicase DHX29 [EC:3.6.4.13]	IPR001650: Helicase, C-terminal
Bcin04g00540			27.2509		none	Protein synthesis	0	0	large subunit ribosomal protein L19e	IPR000196: Ribosomal protein L19/L19e domain
Bcin04g00550			6.38549		none	Metabolism	0	0		IPR001085: Serine hydroxymethyltransferase	SHMT
Bcin04g00770	8.61984	16.9541		9.35085	none	Metabolism	0	0	O-acetylhomoserine/O-acetylserine sulfhydrylase [EC:2.5.1.49 2.5.1.47] Multiple pathways	IPR000277: Cys/Met metabolism, pyridoxal phosphate-dependent enzyme
Bcin04g01050	6.69978	6.96247	28.3246	6.48842	none	Cytoskeleton	0	0	plastin-1	IPR001589: Actinin-type actin-binding domain, conserved site
Bcin04g01290			62.2844		none	Other CAZY	GT62	0		IPR005109: Anp1	Anp1
Bcin04g01480			0.0228606		SignalP-noTM	Protease	0	Yes		IPR001563: Peptidase S10, serine carboxypeptidase
Bcin04g01510			219.967		none	Metabolism	0	0	ethanolamine-phosphate cytidylyltransferase [EC:2.7.7.14] Multiple pathways	IPR004821: Cytidyltransferase-like domain
Bcin04g01630			3.89779		none	Signaling	0	0	cAMP-dependent protein kinase regulator	IPR000595: Cyclic nucleotide-binding domain
Bcin04g01640	46.7234	86.9233	158.558	40.2308	none	Other CAZY	CBM48	0		IPR014756: Immunoglobulin E-set
Bcin04g01660	8.30664	13.5023	11.911	11.1335	none	Protease	0	0	Cys-Gly metallodipeptidase DUG1 [EC:3.4.13.-] Glutathione metabolism	IPR001261: ArgE/DapE/ACY1/CPG2/YscS, conserved site
Bcin04g01670	9.52788	16.1467	412.588	11.47	none	Protein homeostasis	0	0	ubiquitin carboxyl-terminal hydrolase 5/13 [EC:3.4.19.12]	IPR000449: Ubiquitin-associated domain/translation elongation factor EF-Ts, N-terminal
Bcin04g01780			4.39926		none	Metabolism	0	0	acetyl-CoA hydrolase [EC:3.1.2.1] Pyruvate metabolism	IPR003702: Acetyl-CoA hydrolase/transferase
Bcin04g01890	19.902	31.5075	50.081	18.9637	none	Lipid metabolism / Sterol	0	0	diphosphomevalonate decarboxylase [EC:4.1.1.33] Terpenoid backbone biosynthesis	IPR005935: Diphosphomevalonate/phosphomevalonate decarboxylase
Bcin04g02310			0.267819		SignalP-noTM	Transport	0	0		IPR009486: Purine nucleoside permease
Bcin04g02590			26.59		none	Unknown	0	0		None	None
Bcin04g02660			0.121857		none	Hemicellulose degradation	GH31	0		IPR000322: Glycoside hydrolase, family 31
Bcin04g02750			15.7815		none	Signaling	0	0	Ras homolog gene family, member A	IPR001806: Small GTPase superfamily
Bcin04g03040	5.17131		34.1625	5.48805	none	Metabolism	0	0	methylenetetrahydrofolate dehydrogenase (NADP+) / methenyltetrahydrofolate cyclohydrolase / formyltetrahydrofolate synthetase [EC:1.5.1.5 3.5.4.9 6.3.4.3] One carbon pool by folate	IPR000559: Formate-tetrahydrofolate ligase, FTHFS
Bcin04g03060			5.49642		none	Metabolism	0	0		IPR001926: Tryptophan synthase beta subunit-like PLP-dependent enzyme	Trp_syntA
Bcin04g03100			21.4864		none	Oxidoreduction	0	0	ketol-acid reductoisomerase [EC:1.1.1.86] multiple pathways	IPR000506: Acetohydroxy acid isomeroreductase C-terminal
Bcin04g03120			32.1986		TM	FCWE Chitin metabolism	GT2	0		IPR004834: Fungal chitin synthase
Bcin04g03230				2.47075	none	Oxidoreduction	0	0		IPR002198: Short-chain dehydrogenase/reductase SDR	adh_short_C2
Bcin04g03330			23.8397		none	Metabolism	0	0	aspartate aminotransferase, mitochondrial [EC:2.6.1.1] Multiple pathways	IPR000796: Aspartate/other aminotransferase
Bcin04g03580	10.7798	16.9647	13.1979	10.5027	none	Protein synthesis	0	0		IPR000924: Glutamyl/glutaminyl-tRNA synthetase	tRNA-synt_1c
Bcin04g03660			16.3693		none	Metabolism	0	0	V-type H+-transporting ATPase subunit A [EC:7.1.2.2] Oxidative phosphorylation and Phagosome	IPR000194: ATPase, F1/V1/A1 complex, alpha/beta subunit, nucleotide-binding domain
Bcin04g03690			18.5041		none	Traffic	0	0		IPR000375: Dynamin central domain	Dynamin_M
Bcin04g04190	0.0126547	0.0127133	0.00566522	0.0163614	none	Other CAZY	GH15, CBM20	0		IPR000165: Glucoamylase
Bcin04g04260			11.6694		none	Protein synthesis	0	0	methionyl-tRNA synthetase [EC:6.1.1.10]	IPR001412: Aminoacyl-tRNA synthetase, class I, conserved site
Bcin04g04300			0.116999		TM	Unknown	0	0		IPR005545: YCII-related	YCII
Bcin04g04320				15.4117	none	Metabolism	0	0	ornithine carbamoyltransferase [EC:2.1.3.3] Multiple pathways	IPR002292: Ornithine/putrescine carbamoyltransferase
Bcin04g04360				2.84822	none	Metabolism	0	0	homoaconitase [EC:4.2.1.-] Multiple pathways	IPR000573: Aconitase A/isopropylmalate dehydratase small subunit, swivel
Bcin04g04420			2563.02		none	Unknown	0	0		IPR000449: Ubiquitin-associated domain/translation elongation factor EF-Ts, N-terminal	UBA
Bcin04g04490			6.87216		none	Metabolism	0	0	asparagine synthase (glutamine-hydrolysing) [EC:6.3.5.4] Multiple pathways	IPR000583: Class II glutamine amidotransferase domain
Bcin04g04680	13.4511	13.8283	78.2746	12.3501	none	Oxidoreduction	0	0		IPR002198: Short-chain dehydrogenase/reductase SDR	adh_short
Bcin04g04820	2.75655		7.36474		none	Metabolism	0	0	V-type H+-transporting ATPase subunit B Oxidative phosphorylation and Phagosome	IPR000194: ATPase, F1/V1/A1 complex, alpha/beta subunit, nucleotide-binding domain
Bcin04g04830			0.157865		SignalP-noTM	Metabolism	0	0		IPR008183: Aldose 1-/Glucose-6-phosphate 1-epimerase	Pfam: Aldose_epim
Bcin04g04930	0.151563	0.146669	0.0869287		SignalP-noTM	Pectin degradation	GH28	0		IPR000743: Glycoside hydrolase, family 28
Bcin04g05070			59.9102		none	Protein synthesis	0	0	small subunit ribosomal protein S6e	IPR001377: Ribosomal protein S6e
Bcin04g05190			444.84		none	Protein synthesis	0	0	small subunit ribosomal protein S8e	IPR001047: Ribosomal protein S8e
Bcin04g05260			27.8019		none	Protein synthesis	0	0	leucyl-tRNA synthetase [EC:6.1.1.4]	IPR002300: Aminoacyl-tRNA synthetase, class Ia
Bcin04g05500			12.2325		none	Metabolism	0	0	dihydroorotase [EC:3.5.2.3] Pyrimidine metabolism	IPR002195: Dihydroorotase, conserved site
Bcin04g05580	0.00167296	0.00178967	0.000962323	0.00278263	SignalP-noTM	Oxidoreduction	0	0		IPR015889: Intradiol ring-cleavage dioxygenase, core	Pfam: Dioxygenase_C
Bcin04g05620			109.318		none	DNA / RNA metabolism	0	0	transcription elongation factor SPT6	IPR000980: SH2 domain
Bcin04g05810	7.65967	8.62126			none	Protein synthesis	0	0	translation initiation factor 3 subunit F RNA transport	IPR000555: JAB1/MPN/MOV34 metalloenzyme domain
Bcin04g05920	2.52419		76.121		none	Cytoskeleton	0	0	septin 3/9/12	IPR000038: Cell division protein GTP binding
Bcin04g05960			0.0527559		SignalP-noTM	Oxidoreduction	0	0		IPR008972: Cupredoxin	Pfam: Cu_bind_like
Bcin04g06020	0.0420423	0.0393473	0.0518303	0.0784191	SignalP-noTM	PCWDE_HP	GH35	0		IPR001944: Glycoside hydrolase, family 35
Bcin04g06230	22.5399	17.4175		32.3282	none	Oxidoreduction	0	0	nitric oxide dioxygenase [EC:1.14.12.17]	IPR000971: Globin
Bcin04g06250			0.11872		SignalP-noTM	Other CAZy	GH13	0		IPR006047: Glycosyl hydrolase, family 13, catalytic domain
Bcin04g06380			0.0136148		SignalP-noTM	Unknown	0	0		IPR021054: Cell wall galactomannoprotein	Pfam: HsbA
Bcin04g06450			14.678		none	Oxidoreduction	0	0		IPR001395: Aldo/keto reductase	Aldo_ket_red
Bcin04g06740			145.245		none	Metabolism	0	0	ribonucleoside-diphosphate reductase subunit M1 [EC:1.17.4.1] Multiple pathways	IPR000788: Ribonucleotide reductase large subunit, C-terminal	Ribonuc_red_lgC
Bcin04g06920			0.00853247		SignalP-noTM	Metabolism	0	0		IPR002018: Carboxylesterase, type B
Bcin04g06990			0.0741798		SignalP-noTM	PCWDE_HP	GH43	0		IPR006710: Glycoside hydrolase, family 43
Bcin05g00010	28.3711	19.1734	8.22347	15.333	none	Oxidoreduction	0	0		IPR001395: Aldo/keto reductase	Aldo_ket_red
Bcin05g00090			21.6477		none	Unknown	0	0		IPR000629: RNA helicase, ATP-dependent, DEAD-box, conserved site
Bcin05g00180			29.1406		none	Protein homeostasis	0	0		IPR029048: Heat shock protein 70kD, C-terminal domain	HSP70
Bcin05g00410			5.19537		SignalP-noTM	Unknown	0	0		None	Pfam: DUF3309
Bcin05g00420	3.90451	5.50989	7.00494	4.79366	none	Metabolism	0	0	UDP-N-acetylglucosamine/UDP-N-acetylgalactosamine diphosphorylase [EC:2.7.7.23 2.7.7.83] Multiple pathways	IPR002618: UTP--glucose-1-phosphate uridylyltransferase family
Bcin05g01030	9.32614			8.51094	none	Oxidoreduction	0	0	D-xylulose reductase [EC:1.1.1.9] Pentose and glucuronate interconversions	IPR002085: Alcohol dehydrogenase superfamily, zinc-type
Bcin05g01150	21.6111	28.1995		15.4712	none	Oxidoreduction	0	0	L-iditol 2-dehydrogenase [EC:1.1.1.14] Sugar metabolism	IPR002085: Alcohol dehydrogenase superfamily, zinc-type
Bcin05g01360			121.004		none	Metabolism	0	0	2-oxoglutarate dehydrogenase E1 component [EC:1.2.4.2] Multiple pathways	IPR011603: 2-oxoglutarate dehydrogenase E1 component
Bcin05g01510			0.0108623		SignalP-noTM	Unknown	0	0		None	Pfam: PAN_4
Bcin05g01550	10.9307	11.6566		7.2494	none	Oxidoreduction	0	0		IPR001395: Aldo/keto reductase	Aldo_ket_red
Bcin05g01660	15.6118	16.067	97.5845	21.2797	SignalP-noTM	FCWE Glucan metabolism	GH5	0		IPR001547: Glycoside hydrolase, family 5
Bcin05g01750	7.53635	11.9082	37.228	8.44063	SignalP-noTM	Unknown	0	0		IPR010816: Heterokaryon incompatibility Het-C
Bcin05g02430		0.321835		0.46141	SignalP-noTM	Oxidoreduction	0	0		IPR000028: Chloroperoxidase	Pfam: Peroxidase_2
Bcin05g02520	3.07117	4.69649			SignalP-noTM	Pectin degradation	GH28	0		IPR000743: Glycoside hydrolase, family 28
Bcin05g02870	15.3967		47.7497		none	Protein homeostasis	0	0	26S proteasome regulatory subunit N6	IPR000717: Proteasome component (PCI) domain
Bcin05g02910			Infinity		none	Protein homeostasis	0	0	T-complex protein 1 subunit gamma	IPR002194: Chaperonin TCP-1, conserved site
Bcin05g03000	5.09056		25.0613	4.60111	none	Protein synthesis	0	0	alanyl-tRNA synthetase [EC:6.1.1.7]	IPR002318: Alanine-tRNA ligase, class IIc
Bcin05g03100	20.9234	30.8863	25.2041	18.6793	none	Protein homeostasis	0	0	stress-induced-phosphoprotein 1	IPR001440: Tetratricopeptide TPR1
Bcin05g03230			13.8682		none	Metabolism	0	0	xylulose-5-phosphate/fructose-6-phosphate phosphoketolase [EC:4.1.2.9 4.1.2.22] Pentose phosphate pathway	IPR005593: Xylulose 5-phosphate/Fructose 6-phosphate phosphoketolase
Bcin05g03390			58.8874		SignalP-noTM	FCWE Glucan metabolism	GH5	0		IPR017853: Glycoside hydrolase, superfamily
Bcin05g03460			0.0355208		SignalP-noTM	Unknown	0	0		IPR029058: Alpha/Beta hydrolase fold	Pfam: Hydrolase_4
Bcin05g03540			31.7551		none	Metabolism	0	0		IPR001077: O-methyltransferase, family 2	Methyltransf_2
Bcin05g03550			19.3506		none	Oxidoreduction (Laccase)	AA1	0		IPR002355: Multicopper oxidase, copper-binding site	Cu-oxidase_3
Bcin05g03750			201.52		none	Metabolism	0	0	L-serine/L-threonine ammonia-lyase [EC:4.3.1.17 4.3.1.19] Multiple pathways	IPR000634: Serine/threonine dehydratase, pyridoxal-phosphate-binding site
Bcin05g03880			157.018		SignalP-TM	Oxidoreduction	0	0		IPR001128: Cytochrome P450	p450
Bcin05g04010	0.0253989	0.0657609	0.00152852	0.0139757	SignalP-noTM	Unknown	0	0		0	Pfam: SnoaL_4
Bcin05g04060	242.141	442.908	16.9972		none	Cytoskeleton	0	0	actin-related protein 4	IPR004000: Actin-related protein
Bcin05g04380	0.0018519	0.0079684	0.0267364	0.040952	none	Unknown	0	0		IPR006175: YjgF/Yer057p/UK114 family	Ribonuc_L-PSP
Bcin05g04420			17.187		none	Protease	0	0	mitochondrial-processing peptidase subunit beta [EC:3.4.24.64]	IPR001431: Peptidase M16, zinc-binding site
Bcin05g04670				25.8457	none	Cytoskeleton	0	0	dynein light chain LC8-type	IPR001372: Dynein light chain, type 1/2
Bcin05g04720	0.145209	0.135195	0.1168		none	Unknown	0	0		IPR006056: Enamine/imine deaminase YjgF-like	Ribonuc_L-PSP
Bcin05g04870	5.08123	6.72452	47.7599	5.72304	none	Oxidoreduction	0	0		IPR003953: FAD binding domain	FAD_binding_2
Bcin05g04910	15.515		87.992		none	Unknown	0	0		IPR011993: Pleckstrin homology-like domain	PH_6
Bcin05g05040	3.49002				none	Oxidoreduction	0	0	superoxide dismutase, Fe-Mn family [EC:1.15.1.1] Peroxisome	IPR001189: Manganese/iron superoxide dismutase
Bcin05g05090			0.245387		SignalP-TM	FCWE Glucan metabolism	GH72	0		IPR004886: Glucanosyltransferase
Bcin05g05160	0.000611349	0.00197096	0.00139105	0.00217754	SignalP-noTM	Unknown	0	0		None	Pfam: Glyco_hydro_88
Bcin05g05170			0.0366497		none	Unknown	0	0		IPR002678: GTP cyclohydrolase 1 type 2/Nif3	None
Bcin05g05260			17.8151		none	Metabolism	0	0	phosphoribosyl-ATP pyrophosphohydrolase / phosphoribosyl-AMP cyclohydrolase / histidinol dehydrogenase [EC:3.6.1.31 3.5.4.19 1.1.1.23] Multiple pathways	IPR001692: Histidinol dehydrogenase, conserved site
Bcin05g05320	4.67045	5.35998	11.9167	6.7162	SignalP-noTM	Unknown	0	0		None	None
Bcin05g05690	10.7055	15.7315	35.9262		none	Oxidoreduction	0	0		IPR002198: Short-chain dehydrogenase/reductase SDR	adh_short
Bcin05g05700			18.2218		none	traffic	0	0	vesicle-fusing ATPase [EC:3.6.4.6]	IPR003338: CDC48, N-terminal subdomain
Bcin05g05820			9.11865		none	Protein synthesis	0	0	small subunit ribosomal protein SAe	IPR001865: Ribosomal protein S2
Bcin05g05830			0.00359271		SignalP-noTM	Protease	0	Yes		IPR000209: Peptidase S8/S53 domain
Bcin05g05900	0.0289271	0.0207701	0.00533651	0.0267341	SignalP-noTM	Protease	0	Yes		IPR001461: Aspartic peptidase
Bcin05g05930			5.54345		SignalP-TM	Other CAZY	AA7, CBM18	0		IPR012951: Berberine/berberine-like
Bcin05g05960	4.17434	4.58038	91.4467	5.04859	none	Metabolism	0	0		IPR004839: Aminotransferase, class I/classII	Aminotran_1_2
Bcin05g05970	54.2241			52.2513	none	Metabolism	0	0	V-type H+-transporting ATPase subunit a Oxidative phosphorylation and Phagosome	IPR002490: V-type ATPase, V0 complex, 116kDa subunit family
Bcin05g06020	0.0615644	0.052994	0.0713834	0.119548	SignalP-noTM	Hemicellulose degradation	GH10, CBM1	0		IPR000254: Cellulose-binding domain, fungal GH10
Bcin05g06130			19.5297		none	Protein synthesis	0	0	large subunit ribosomal protein L31e	IPR000054: Ribosomal protein L31e
Bcin05g06320			5.941		none	Protein homeostasis	0	0		IPR002130: Cyclophilin-type peptidyl-prolyl cis-trans isomerase domain	Pro_isomerase
Bcin05g06430			30.775		none	Metabolism	0	0	formyltetrahydrofolate deformylase [EC:3.5.1.10] Multiple pathways	IPR001810: F-box domain
Bcin05g06730	5.57609	8.25822	581.413	4.42805	none	Metabolism	0	0	anthranilate synthase / indole-3-glycerol phosphate synthase / phosphoribosylanthranilate isomerase [EC:4.1.3.27 4.1.1.48 5.3.1.24] Multiple pathways	IPR001240: N-(5'phosphoribosyl) anthranilate isomerase (PRAI) like domain	IGPS
Bcin05g07000			77.9102		none	Lipid metabolism	0	0		IPR000873: AMP-dependent synthetase/ligase	AMP-binding
Bcin05g07190			37.3307		none	Unknown	0	0		IPR002818: ThiJ/PfpI	DJ-1_PfpI
Bcin05g07270	19.9894	35.4229	16.2964	16.3576	none	Other CAZY	GH3	0		IPR026892: Glycoside hydrolase family 3
Bcin05g07310			48.1661		none	Unknown	0	0		IPR012336: Thioredoxin-like fold	Thioredoxin_4
Bcin05g07430	5.40244	7.87526	127.578		none	Metabolism	0	0	acetyl-CoA C-acetyltransferase [EC:2.3.1.9] Multiple pathways	IPR002155: Thiolase
Bcin05g07670	34.763	65.457			none	Oxidoreduction	0	0		IPR002085: Alcohol dehydrogenase superfamily, zinc-type	ADH_N
Bcin05g08130	0.0752747	0.05591	0.151898	0.0857068	SignalP-noTM	Hemicellulose degradation	GH115	0		IPR029018: Chitobiase/beta-hexosaminidase domain 2-like
Bcin05g08240			3.02718		SignalP-noTM	Pectin degradation	GH28	0		IPR000743: Glycoside hydrolase, family 28
Bcin05g08270		0.223272	0.480858		SignalP-noTM	Oxidoreduction	0	0		IPR006094: FAD linked oxidase, N-terminal	Pfam: FAD_binding_4
Bcin05g08280			18.6359		none	Oxidoreduction	0	0	IMP dehydrogenase [EC:1.1.1.205] Purine & secondary metabolites	IPR000644: CBS domain
Bcin05g08330	6.84733	8.88281	7.40329	9.12557	SignalP-noTM	PCWDE_HP	CE12	0		IPR013831: SGNH hydrolase-type esterase domain
Bcin05g08370	63.2851	234.253	12.4758		SignalP-noTM	Protein homeostasis	0	0	protein disulfide-isomerase A6 [EC:5.3.4.1] Protein processing in ER	IPR012336: Thioredoxin-like fold
Bcin06g00050			0.0248459		none	Other CAZY	GH89	0		IPR007781: Alpha-N-acetylglucosaminidase
Bcin06g00260	7.11935	15.9476	51.7517	8.45226	none	Protein homeostasis	0	0		IPR013126: Heat shock protein 70 family	HSP70
Bcin06g00330			0.315542		none	Protease	0	Yes		IPR000209: Peptidase S8/S53 domain
Bcin06g00440			99.5212		none	DNA / RNA metabolism	0	0	chromatin assembly factor 1 subunit B	IPR001680: WD40 repeat
Bcin06g00620	0.0203067	0.0152592	0.00268074	0.020728	SignalP-noTM	Protease	0	0		IPR000209: Peptidase S8/S53 domain	Pfam: Pro-kuma_activ
Bcin06g00890			239.336		SignalP-noTM	Other CAZy	AA7	0		IPR006094: FAD linked oxidase, N-terminal
Bcin06g00960	9.13093		392.729	28.9353	SignalP-noTM	Unknown	0	0		IPR023703: Membrane-bound lytic murein transglycosylase F	None
Bcin06g01000	2.79097			3.30839	none	Other CAZY	GH135	0		IPR021986: Spherulation-specific family 4
Bcin06g01580	0.00804282	0.00526554	0.00501916	0.00862844	SignalP-noTM	Pectin degradation	GH79	0		IPR017853: Glycoside hydrolase, superfamily
Bcin06g01600	0.0284979	0.0274758	0.0083041	0.0242335	SignalP-noTM	PCWDE_HP	GH43, CBM35	0		IPR006710: Glycoside hydrolase, family 43
Bcin06g01630			0.00522272		SignalP-noTM	Pectin degradation	GH79	0		IPR017853: Glycoside hydrolase, superfamily
Bcin06g01640	4.81983	7.87823	22.3333	6.09081	none	Metabolism	0	0		IPR010102: Succinate semialdehyde dehydrogenase	Aldedh
Bcin06g01680			3.28976		none	Metabolism	0	0		IPR003140: Phospholipase/carboxylesterase/thioesterase	Abhydrolase_2
Bcin06g01690			6.22729		none	Hemicellulose degradation	GH36	0		IPR008811: Glycosyl hydrolases 36
Bcin06g01840	8.42873	20.3907	95.1884	8.12369	none	Unknown	0	0		IPR000504: RNA recognition motif domain
Bcin06g01850			17.0022		none	Traffic	0	0	ADP-ribosylation factor GTPase-activating protein 1 Endocytosis	IPR001164: Arf GTPase activating protein
Bcin06g01930	0.104642	0.119333	0.178781	0.225083	SignalP-noTM	Other CAZy	AA5, CBM18	0		IPR001002: Chitin-binding, type 1
Bcin06g02120	3.47987		72.4916		none	Traffic	0	0	coatomer subunit gamma	IPR002553: Clathrin/coatomer adaptor, adaptin-like, N-terminal
Bcin06g02140			0.0251017		SignalP-noTM	Pectin degradation	GH28	0		IPR000743: Glycoside hydrolase, family 28
Bcin06g02300	10.7462			8.58401	none	Oxidoreduction	0	0	homoisocitrate dehydrogenase [EC:1.1.1.87] multiple pathways	IPR001804: Isocitrate and isopropylmalate dehydrogenases family
Bcin06g02380	8.46695	9.54403	13.7507	6.97755	none	Metabolism	0	0		IPR029903: RmlD-like substrate binding domain	RmlD_sub_bind
Bcin06g02430			0.120802		none	Metabolism	0	0		IPR004838: Aminotransferases, class-I, pyridoxal-phosphate-binding site	Aminotran_1_2
Bcin06g02460				11.6938	none	Metabolism	0	0		IPR004045: Glutathione S-transferase, N-terminal
Bcin06g02510	0.0217358	0.00841722	0.00277462	0.0423928	SignalP-noTM	Protease	0	Yes		IPR001563: Peptidase S10, serine carboxypeptidase
Bcin06g02610			6.08397		none	Protein homeostasis	0	0	26S proteasome regulatory subunit N5	IPR000717: Proteasome component (PCI) domain
Bcin06g02890			5.38306		none	Protein synthesis	0	0	small subunit ribosomal protein S27e	IPR000592: Ribosomal protein S27e
Bcin06g03070			0.0141183		SignalP-noTM	Protease	0	Yes		IPR000209: Peptidase S8/S53 domain
Bcin06g04100			0.0433826		none	Metabolism	0	0	4'-phosphopantetheinyl transferase [EC:2.7.8.-] Pantothenate and CoA biosynthesis	IPR008278: 4'-phosphopantetheinyl transferase superfamily
Bcin06g04500	0.270613	0.132243	0.297157		SignalP-noTM	PCWDE_HP	GH35	0		IPR001944: Glycoside hydrolase, family 35
Bcin06g04540	5.36406		200.546	3.74784	none	Metabolism	0	0		IPR001077: O-methyltransferase, family 2	Methyltransf_2
Bcin06g04830			42.4682		SignalP-noTM	FCWE Glucan metabolism	GH5	0		IPR001547: Glycoside hydrolase, family 5
Bcin06g05050			0.0308709		SignalP-noTM	Other CAZy	AA13, CBM20	0		IPR002044: Carbohydrate binding module family 20
Bcin06g05120			8.92838		SignalP-noTM	Unknown	0	0		None	None
Bcin06g05200	0.440721				SignalP-noTM	Metabolism	0	0		IPR000560: Histidine phosphatase superfamily, clade-2	Pfam: His_Phos_2
Bcin06g05730			3.40757		SignalP-noTM	Protein homeostasis	0	0	protein disulfide-isomerase A1 [EC:5.3.4.1] Protein processing in ER	IPR005788: Disulphide isomerase
Bcin06g05840			0.466551		SignalP-TM	Unknown	0	0		IPR015915: Kelch-type beta propeller	Rax2
Bcin06g05860			54.4898		none	Protein synthesis	0	0	small subunit ribosomal protein S13e	IPR000589: Ribosomal protein S15
Bcin06g06040	7.93658	9.38465	55.3407	12.5458	SignalP-noTM	Other CAZy	GH132	0		IPR005556: SUN
Bcin06g06330			15.3842		none	Protein synthesis	0	0	large subunit ribosomal protein LP0	IPR001790: Ribosomal protein L10/acidic P0
Bcin06g06410	0.145598				SignalP-noTM	Hemicellulose degradation	CE16, CBM1	0		IPR000254: Cellulose-binding domain, fungal IPR013830: SGNH hydrolase-type esterase domain
Bcin06g06560	5.14479				none	Cytoskeleton	0	0	actin related protein 2/3 complex, subunit 2	IPR007188: ARP2/3 complex, 34kDa subunit (p34-Arc)
Bcin06g06640			56.5493		none	Signaling	0	0		IPR000198: Rho GTPase-activating protein domain	RhoGAP
Bcin06g06670	0.000654404	0.00403316	0.00263934	0.00102475	SignalP-noTM	Unknown	0	0		None	None
Bcin06g06750			4.97468		none	Protease	0	0		IPR007863: Peptidase M16, C-terminal domain	Peptidase_M16_C
Bcin06g06780			2.87993		none	Cytoskeleton	0	0	tropomyosin, fungi type	IPR000533: Tropomyosin
Bcin06g07000	18.8584	36.8923	412.53	38.9717	SignalP-noTM	Unknown	0	0		IPR029058: Alpha/Beta hydrolase fold	Pfam: Tannase
Bcin06g07050			0.00101455		SignalP-noTM	Cellulose degradation	AA9	0		IPR005103: Glycoside hydrolase, family 61
Bcin06g07150	8.01588	13.8734	48.7091	11.8942	SignalP-noTM	Oxidoreduction	0	0		IPR006094: FAD linked oxidase, N-terminal	Pfam: FAD_binding_4
Bcin06g07260			117.528		none	DNA / RNA metabolism	0	0	multisite-specific tRNA:(cytosine-C5)-methyltransferase [EC:2.1.1.202]	IPR001678: Bacterial Fmu (Sun)/eukaryotic nucleolar NOL1/Nop2p
Bcin06g07280			13.5056		none	Unknown	0	0		None	ABC_tran_CTD
Bcin06g07380			0.000235374		none	Metabolism	0	0		IPR004304: Acetamidase/Formamidase
Bcin06g07580	8.86719	8.48122	13.5487	8.07823	none	Unknown	0	0		IPR006094: FAD linked oxidase	FAD_binding_4
Bcin06g07590	11.5951	9.03485	578.815	13.0412	SignalP-TM	FCWE Glucan metabolism	GH71, CBM24	0		IPR005197: Glycoside hydrolase, family 71
Bcin06g07600			175.297		none	Unknown	0	0		None	None
Bcin07g00120			Infinity		none	Unknown	0	0		IPR000629: RNA helicase, ATP-dependent, DEAD-box, conserved site
Bcin07g00440			25.0239		none	Protein homeostasis	0	0	26S proteasome regulatory subunit N3	IPR000717: Proteasome component (PCI) domain
Bcin07g00520			38.6745		none	Protein synthesis	0	0	large subunit ribosomal protein L27e	IPR001141: Ribosomal protein L27e
Bcin07g00710			8.94944		SignalP-noTM	Unknown	0	0		IPR002889: Carbohydrate-binding WSC
Bcin07g00840			29.5602		SignalP-noTM	Protein homeostasis	0	0		IPR002130: Cyclophilin-type peptidyl-prolyl cis-trans isomerase domain
Bcin07g01020	2.58606	3.33625	6.3065		none	Lipid metabolism	0	0		IPR029058: Alpha/Beta hydrolase fold	Hydrolase_4
Bcin07g01070	0.38498				SignalP-noTM	Unknown	0	0		IPR005152: Lipase, secreted	Pfam: Peptidase_S9
Bcin07g01170			33.0914		none	Protein synthesis	0	0	translation initiation factor 5A	IPR001884: Translation elongation factor IF5A
Bcin07g01540			7.83567		none	Protein synthesis	0	0	elongation factor 2	IPR000640: Translation elongation factor EFG, V domain
Bcin07g01610			117.627		none	Protein homeostasis	0	0	DNA damage-inducible protein 1	IPR000626: Ubiquitin-like
Bcin07g01690	6.84229	4.98223	42.4831		none	Metabolism	0	0	phosphoribosylaminoimidazole carboxylase [EC:4.1.1.21] Multiple pathways	IPR000031: Phosphoribosylaminoimidazole carboxylase PurE domain
Bcin07g01720		0.437122	0.499889		SignalP-noTM	Protease	0	Yes		IPR001375: Peptidase S9, prolyl oligopeptidase, catalytic domain
Bcin07g01840			10.4349		none	Other CAZY	AA3	0		IPR000172: Glucose-methanol-choline oxidoreductase, N-terminal	GMC_oxred_N
Bcin07g01990	14.9691			13.4771	none	Oxidoreduction	0	0		IPR001395: Aldo/keto reductase	Aldo_ket_red
Bcin07g02320			9.03563		none	Transport	0	0		IPR012098: Inorganic phosphate transporter Pho88, fungi	Pho88
Bcin07g02370	25.1083	31.484	10.456	21.1997	none	Unknown	0	0		IPR025628: DJ-1 domain, InhA-type	DJ-1_PfpI
Bcin07g02610			2.98156		none	Metabolism	0	0	6-phosphogluconate dehydrogenase [EC:1.1.1.44 1.1.1.343] Multiple pathways	IPR006113: 6-phosphogluconate dehydrogenase, decarboxylating
Bcin07g02650			0.111836		SignalP-noTM	Other CAZy	GH5	0		IPR001547: Glycoside hydrolase, family 5
Bcin07g02860	0.0925695	0.0410211	0.16815	0.126104	SignalP-noTM	Other CAZy	GH25	0		IPR013781: Glycoside hydrolase, catalytic domain
Bcin07g02940	0.0499972	0.0443681	0.0287748	0.0602214	SignalP-noTM	Unknown	0	0		IPR006652: Kelch repeat type 1	Pfam: Kelch_1
Bcin07g03030			2.85117		none	Traffic	0	0	Ras-related protein Rab-1A	IPR001806: Small GTPase superfamily
Bcin07g03040	7.39728	10.9426	16.471	7.74454	none	Other CAZY	AA3	0		IPR000172: Glucose-methanol-choline oxidoreductase, N-terminal	GMC_oxred_N
Bcin07g03280	0.0239515	0.024285	0.0159511	0.0558503	TM	Hemicellulose degradation	CE16	0		IPR013830: SGNH hydrolase-type esterase domain
Bcin07g03430			0.262248		none	Metabolism	0	0		IPR004045: Glutathione S-transferase, N-terminal
Bcin07g03460	7.40282		7.04498	8.73601	none	Oxidoreduction	0	0		IPR013931: Oxidative stress survival, Svf1-like	Svf1
Bcin07g03810	15.347		67.789	17.7252	none	Protein synthesis	0	0	arginyl-tRNA synthetase [EC:6.1.1.19]	IPR001278: Arginine-tRNA ligase
Bcin07g04000	0.044258	0.0481081	0.00511996	0.0854735	SignalP-noTM	Other CAZy	GH92	0		IPR005887: Alpha-1,2-mannosidase, putative
Bcin07g04030			6.82867		SignalP-noTM	Unknown	0	0		None	AdoMet_MTase
Bcin07g04150	172.583	129.615			none	Metabolism	0	0	D-glycerate 3-kinase [EC:2.7.1.31] Multiple pathways	IPR027417: P-loop containing nucleoside triphosphate hydrolase
Bcin07g04170	4.59645		91.6517		none	Lipid metabolism	0	0	long-chain acyl-CoA synthetase [EC:6.2.1.3] Multiple pathways	IPR000873: AMP-dependent synthetase/ligase	AMP-binding
Bcin07g04280			63.9032		none	Oxidoreduction	0	0	isocitrate dehydrogenase (NAD+) [EC:1.1.1.41] multiple pathways	IPR001804: Isocitrate and isopropylmalate dehydrogenases family
Bcin07g04290			0.0133535		none	Metabolism	0	0		IPR000560: Histidine phosphatase superfamily, clade-2	His_Phos_2
Bcin07g04330			85.124		none	Transport	0	0	transportin-3	IPR001494: Importin-beta, N-terminal domain
Bcin07g04350	0.00973956	0.0130782	0.00933499	0.0164911	SignalP-noTM	Lipid metabolism	0	0	sphingomyelin phosphodiesterase [EC:3.1.4.12] Sphingolipid metabolism	IPR004843: Calcineurin-like phosphoesterase domain, apaH type
Bcin07g04370	0.0189816	0.0209865	0.00914037	0.0505503	SignalP-noTM	Oxidoreduction	0	0		IPR029045: ClpP/crotonase-like domain	Pfam: Peptidase_S41
Bcin07g04500			13.9555		none	Protein homeostasis	0	0	FK506-binding nuclear protein [EC:5.2.1.8]	IPR001179: Peptidyl-prolyl cis-trans isomerase, FKBP-type, domain
Bcin07g04620	14.1941	23.3491	20.0803	9.68671	none	Cytoskeleton	0	0	capping protein (actin filament) muscle Z-line, beta	IPR001698: F-actin-capping protein subunit beta
Bcin07g04630			176.912		none	Metabolism	0	0		IPR001509: NAD-dependent epimerase/dehydratase, N-terminal domain	Epimerase
Bcin07g04730		19.6339	18.8011	11.7797	none	Signaling	0	0	calcium/calmodulin-dependent protein kinase I [EC:2.7.11.17]	IPR000719: Protein kinase domain
Bcin07g04790	6.47811	11.5196	9.47207	13.4496	SignalP-noTM	Unknown	0	0		IPR002018: Carboxylesterase, type B	Pfam: COesterase
Bcin07g04810	8.98312	10.3021	74.9311	14.4268	SignalP-noTM	FCWE Chitin metabolism	GH20	0		IPR013781: Glycoside hydrolase, catalytic domain
Bcin07g04890			10.7074		none	Protein homeostasis	0	0	ubiquitin carboxyl-terminal hydrolase 7 [EC:3.4.19.12]	IPR001394: Peptidase C19, ubiquitin carboxyl-terminal hydrolase
Bcin07g05090			4.38998		none	Signaling	0	0	Ras-related protein Rab-11A	IPR001806: Small GTPase superfamily
Bcin07g05140			5.15607		none	Protein homeostasis	0	0	chaperonin GroEL	IPR001844: Chaperonin Cpn60
Bcin07g05440	0.039069	0.0389033	0.0547574	0.101385	SignalP-noTM	Unknown	0	0		None	None
Bcin07g05530			0.074033		none	Other CAZY	GH47	0		IPR001382: Glycoside hydrolase, family 47
Bcin07g05550			0.100147		none	Unknown	0	0		None	None
Bcin07g05560	0.196673	0.258563		0.181862	none	Unknown	0	0		None	DUF346
Bcin07g05850	9.40594	7.80032	208.47	11.3373	SignalP-noTM	Unknown	0	0		None	None
Bcin07g06060	12.4798	10.8454	80.1643	15.2137	none	Oxidoreduction	0	0		IPR002198: Short-chain dehydrogenase/reductase SDR	adh_short
Bcin07g06150			Infinity		none	Traffic	0	0		IPR004328: BRO1 domain	BRO1
Bcin07g06220			5.02223		none	Protein homeostasis	0	0	molecular chaperone DnaK	IPR012725: Chaperone DnaK
Bcin07g06360			6.50321		none	Oxidoreduction	0	0		IPR003171: Methylenetetrahydrofolate reductase	MTHFR
Bcin07g06400	5.52626	8.40467	20.0726	6.31171	none	Traffic	0	0	Rab GDP dissociation inhibitor	IPR000806: Rab GDI protein
Bcin07g06550			3.84781		none	Metabolism	0	0		IPR001030: Aconitase/3-isopropylmalate dehydratase large subunit, alpha/beta/alpha	Aconitase
Bcin07g06600	31.8202	26.3967	14.2071	28.0647	SignalP-noTM	Other CAZy	GH132	0		IPR005556: SUN
Bcin07g06700			3.80233	3.4344	none	Other CAZY	GH1	0		IPR001360: Glycoside hydrolase, family 1
Bcin07g06780	0.023328	0.0255542	0.0111456	0.0277743	SignalP-noTM	Oxidoreduction (Laccase)	AA1	0		IPR001117: Multicopper oxidase, type 1
Bcin07g06960			32.6815		none	Metabolism	0	0		IPR000022: Carboxyl transferase	ACC_central
Bcin07g07090			126.337		none	Oxidoreduction	0	0		IPR000907: Lipoxygenase	Lipoxygenase F-box_4
Bcin08g00060			0.129237		none	PCWDE HP	GH43	0		IPR006710: Glycoside hydrolase, family 43	Glyco_hydro_43
Bcin08g00150	0.126165	0.129436	0.222991		SignalP-noTM	Unknown	0	0		IPR000909: Phospholipase C, phosphatidylinositol-specific , X domain
Bcin08g00280	0.0106825	0.0114331	0.00137591	0.00928043	SignalP-noTM	Protease	0	Yes		IPR001563: Peptidase S10, serine carboxypeptidase
Bcin08g00300		8.79392	35.11	6.68466	none	Metabolism	0	0		IPR004045: Glutathione S-transferase, N-terminal
Bcin08g00370			35.208		none	Traffic	0	0		IPR004148: BAR domain	BAR
Bcin08g00400	0.0116658	0.01317	0.00232805	0.0150588	SignalP-noTM	Unknown	0	0		None	Pfam: Lipocalin_4
Bcin08g00600			27.2495		none	traffic	0	0	sorting nexin-8	IPR001683: Phox homologous domain
Bcin08g00720	0.0679973	0.102003	0.0838294	0.126136	SignalP-noTM	Protease	0	Yes		IPR001461: Aspartic peptidase
Bcin08g00790			61.5492		none	Unknown	0	0		IPR001251: CRAL-TRIO domain	CRAL_TRIO
Bcin08g00890	0.0023233	0.00196578	0.00453099	0.00518832	SignalP-noTM	PCWDE_HP	GH51	0		IPR010720: Alpha-L-arabinofuranosidase, C-terminal
Bcin08g00910			0.48612		SignalP-noTM	FCWE Glucan metabolism	GH17	0		IPR000490: Glycoside hydrolase, family 17
Bcin08g00950	0.0115509	0.0106149	0.0107184	0.0092849	SignalP-noTM	Hemicellulose degradation	CE16	0		IPR013830: SGNH hydrolase-type esterase domain
Bcin08g01020	0.0204123	0.00844441	0.00223279	0.0507026	SignalP-noTM	Protease	0	Yes		IPR000209: Peptidase S8/S53 domain
Bcin08g01060	14.4066	37.2913	Infinity	58.5194	none	Oxidoreduction	0	0		IPR006094: FAD linked oxidase, N-terminal	FAD_binding_4
Bcin08g01110	5.64953	11.6517	10.427	8.30285	none	Woronin body	0	0		IPR001884: Translation elongation factor IF5A	eIF-5a
Bcin08g01180			0.13781		none	DNA / RNA metabolism	0	0		IPR001138: Zn(2)-C6 fungal-type DNA-binding domain	Fungal_trans_2
Bcin08g01580			0.100279		SignalP-noTM	Cuticle degradation	CE5	0		IPR000675: Cutinase
Bcin08g01900		5.22557	6.94871	5.15033	SignalP-noTM	FCWE Chitin metabolism	GH18	0		IPR001579: Glycoside hydrolase, chitinase active site	Pfam: Glyco_hydro_18
Bcin08g02080	0.0272176	0.0174674	0.0364575	0.0258919	none	Unknown	0	0		IPR007138: Antibiotic biosynthesis monooxygenase-like domain	ABM Dabb
Bcin08g02090	29.8013	60.2312		17.4504	none	Other CAZY	AA3	0		IPR000172: Glucose-methanol-choline oxidoreductase, N-terminal	GMC_oxred_N
Bcin08g02110	0.00563868	0.00497432	0.00644737	0.00738669	SignalP-noTM	Other CAZy	GH5, CBM1	0		IPR001547: Glycoside hydrolase, family 5
Bcin08g02120	0.00419117	0.00592402	0.0062963	0.00721532	SignalP-noTM	Hemicellulose degradation	GH27, CBM35	0		IPR002241: Glycoside hydrolase, family 27
Bcin08g02380			3.18022		SignalP-noTM	Protein homeostasis	0	0	protein disulfide-isomerase A6 [EC:5.3.4.1] Protein processing in ER	IPR005788: Disulphide isomerase
Bcin08g02390	0.0255081	0.0277964	0.0203926	0.0401302	SignalP-noTM	Protease	0	Yes		IPR008758: Peptidase S28
Bcin08g02620			9.78256		none	Unknown	0	0		IPR000504: RNA recognition motif domain
Bcin08g02770	4.54856				none	Cytoskeleton	0	0	cell division control protein 11	IPR000038: Cell division protein GTP binding
Bcin08g02970				2.32849	SignalP-noTM	Pectin degradation	CE8	0		IPR000070: Pectinesterase, catalytic
Bcin08g03150	18.17	13.8515	11.8155	14.8906	none	Metabolism	0	0		IPR004006: Dak kinase
Bcin08g03320		3.41332		3.84055	SignalP-noTM	Unknown	0	0		IPR018466: Ser-Thr-rich glycosyl-phosphatidyl-inositol-anchored membrane family	GPI-anchored
Bcin08g03540			47.4124		none	DNA / RNA metabolism	0	0	pre-mRNA-processing factor 8 Spliceosome	IPR012337: Ribonuclease H-like domain
Bcin08g03700	4.51382	5.05998	36.1658		none	Protein homeostasis	0	0	transitional endoplasmic reticulum ATPase Protein processing in ER	IPR003338: CDC48, N-terminal subdomain
Bcin08g03820	5.16936	5.07697	4.53578	4.55413	SignalP-noTM	Pectin degradation	PL1	0		IPR002022: Pectate lyase/Amb allergen
Bcin08g04420			12.0008		none	Metabolism	0	0		IPR009453: IMP-specific 5-nucleotidase	ISN1
Bcin08g04510		16.0384		27.9162	none	Signaling	0	0		IPR000387: Protein-tyrosine/Dual specificity phosphatase	Y_phosphatase3
Bcin08g04590	0.0339997	0.0349392	0.00727461	0.0372493	SignalP-noTM	Unknown	0	0		IPR008928: Six-hairpin glycosidase-like
Bcin08g04680		0.495943			none	DNA / RNA metabolism	0	0	COMPASS component SWD2 mRNA surveillance pathway	IPR001680: WD40 repeat
Bcin08g04730	8.67051	12.0031	5.00454	6.84456	none	Metabolism	0	0	fructose-1,6-bisphosphatase I [EC:3.1.3.11] Multiple pathways	IPR000146: Fructose-1,6-bisphosphatase class 1/Sedoheputulose-1,7-bisphosphatase	FBPase
Bcin08g05000			0.0495447		SignalP-noTM	Oxidoreduction	0	0		IPR010424: Ethanolamine utilisation EutQ IPR011051: RmlC-like cupin domain IPR013096: Cupin 2, conserved barrel	Pfam: Cupin_2
Bcin08g05160			60.9958		none	Transport	0	0	importin-7	IPR011989: Armadillo-like helical
Bcin08g05220			0.271299		none	Metabolism	0	0	triosephosphate isomerase (TIM) [EC:5.3.1.1] Multiple pathways	IPR000652: Triosephosphate isomerase
Bcin08g05320	2.60771		44.7928	3.3671	none	Transport	0	0	Ran-binding protein 1	IPR000156: Ran binding domain	Ran_BP1
Bcin08g05630	0.0745888		0.236758	0.0879116	none	Metabolism	0	0	cyanate lyase [EC:4.2.1.104] Nitrogen metabolism	IPR003712: Cyanate lyase, C-terminal
Bcin08g05770			17.0257		none	Transport	0	0		IPR000225: Armadillo	Arm
Bcin08g05800			669.023		none	Protein synthesis	0	0		IPR002312: Aspartyl/Asparaginyl-tRNA synthetase, class IIb	tRNA-synt_2
Bcin08g05830			11.8022		none	Unknown	0	0		IPR022039: Temperature dependent protein affecting M2 dsRNA replication, C-terminal	MKT1_C
Bcin08g05870	0.0333927	0.0279628	0.0322532	0.0513878	SignalP-noTM	Hemicellulose degradation	GH95	0		IPR008928: Six-hairpin glycosidase-like
Bcin08g06110			0.141395		SignalP-noTM	FCWE	GH76	0		IPR005198: Glycoside hydrolase, family 76
Bcin08g06280			12.31		SignalP-TM	Unknown	0	0		IPR011936: Myxococcus cysteine-rich repeat	DUF4215
Bcin08g06300	23.5421	40.8306	4459.49	28.5436	none	Metabolism	0	0	6-phosphofructokinase 1 [EC:2.7.1.11] Multiple pathways	IPR000023: Phosphofructokinase domain
Bcin08g06700	4.58696	5.33157			none	Protein homeostasis	0	0		IPR013538: Activator of Hsp90 ATPase homologue 1-like	Aha1_N
Bcin09g00120	7.79339		3.58946		none	Traffic	0	0	arsenite/tail-anchored protein-transporting ATPase [EC:3.6.3.16 3.6.3.-]	IPR016300: Arsenical pump ATPase, ArsA/GET3
Bcin09g00190	0.0276211	0.0268488	0.0408245	0.0384083	SignalP-noTM	FCWE	GH76	0		IPR005198: Glycoside hydrolase, family 76
Bcin09g00200	0.352165		0.0817487		SignalP-noTM	FCWE Glucan metabolism	GH17	0		IPR013781: Glycoside hydrolase, catalytic domain
Bcin09g00220	0.00736167	0.0142382	0.000670323	0.0122698	SignalP-noTM	Unknown	0	0		None	None
Bcin09g00280			81.7627		none	DNA / RNA metabolism	0	0	cellular nucleic acid-binding protein	IPR001878: Zinc finger, CCHC-type
Bcin09g00460	0.0103289	0.0114302	0.00737316	0.00620823	SignalP-noTM	Unknown	0	0		None	Pfam: SBP_bac_6
Bcin09g00480	0.370602				SignalP-TM	Oxidoreduction	0	0		None	NAD_binding_8
Bcin09g00510	60.454	89.5754		124.782	SignalP-noTM	Protein homeostasis	0	0		IPR008971: HSP40/DnaJ peptide-binding
Bcin09g00600	15.3013		5.79526		none	Oxidoreduction	0	0		IPR002198: Short-chain dehydrogenase/reductase SDR	adh_short_C2
Bcin09g00620	0.0971361	0.0606905	0.0294797	0.0996162	SignalP-noTM	FCWE Chitin metabolism	0	0		IPR002509: Polysaccharide deacetylase
Bcin09g00770			9.79775		SignalP-noTM	Metabolism	0	0		IPR011042: Six-bladed beta-propeller, TolB-like
Bcin09g00980			4.33232		none	Oxidoreduction	0	0	isocitrate dehydrogenase [EC:1.1.1.42] multiple pathways	IPR004790: Isocitrate dehydrogenase NADP-dependent
Bcin09g01030	26.8823	21.557			none	Unknown	0	0		IPR022085: Protein of unknown function DUF3632	DUF3632
Bcin09g01110	2.92411	3.54882	2.97524		SignalP-noTM	Cellulose degradation	GH7, CBM1	0		IPR001722: Glycoside hydrolase, family 7
Bcin09g01180	4.35032		17.93	4.41544	none	Traffic	0	0	sec1 family domain-containing protein 1	IPR001619: Sec1-like protein
Bcin09g01190			0.0696825		SignalP-noTM	Protease	0	0		IPR000209: Peptidase S8/S53 domain	Pfam: Pro-kuma_activ
Bcin09g01400	6.28998			8.47649	none	Protein homeostasis	0	0	peptidyl-prolyl isomerase D [EC:5.2.1.8]	IPR002130: Cyclophilin-type peptidyl-prolyl cis-trans isomerase domain
Bcin09g01550				3.86581	none	Cytoskeleton	0	0	actin related protein 2/3 complex, subunit 4	IPR008384: ARP2/3 complex, 20kDa subunit (P20-Arc)
Bcin09g01730	4.14602				none	Protein homeostasis	0	0	ubiquitin-conjugating enzyme E2 N [EC:2.3.2.23]	IPR000608: Ubiquitin-conjugating enzyme, E2
Bcin09g01800			0.0263149		SignalP-noTM	Hemicellulose degradation	CE3	0		IPR013830: SGNH hydrolase-type esterase domain
Bcin09g01930				4.40866	none	Metabolism	0	0	2-methylcitrate dehydratase [EC:4.2.1.79] Propanoate metabolism	IPR005656: MmgE/PrpD
Bcin09g02020			64.6737		none	Signaling	0	0		IPR000719: Protein kinase domain	Pkinase
Bcin09g02050	0.0238726	0.0252868	0.0487901	0.0396122	none	Oxidoreduction (Laccase)	AA1	0		IPR001117: Multicopper oxidase, type 1
Bcin09g02090	10.6052			11.9925	TM	Traffic	0	0	vesicle-associated membrane protein 4 SNARE interaction	IPR001388: Synaptobrevin
Bcin09g02100			7.53747		none	Metabolism	0	0	N-acetyl-gamma-glutamyl-phosphate reductase / acetylglutamate kinase [EC:1.2.1.38 2.7.2.8] Multiple pathways	IPR000534: Semialdehyde dehydrogenase, NAD-binding
Bcin09g02350	5.46209e-06	0.000365387		0.00052454	SignalP-noTM	Protease	0	0	carboxypeptidase D [EC:3.4.16.6]	IPR001563: Peptidase S10, serine carboxypeptidase
Bcin09g02390	3.62694		19.2208	3.29422	none	Signaling	0	0	mitogen-activated protein kinase 7 [EC:2.7.11.24]	IPR000719: Protein kinase domain
Bcin09g02500			7.29162		none	Unknown	0	0		IPR009097: RNA ligase/cyclic nucleotide phosphodiesterase
Bcin09g02680	9.5117	12.862	31.1595	8.14761	none	Other CAZY	GHnc	0		IPR004888: Glycoside hydrolase, family 63
Bcin09g02790			92.0789		none	Metabolism	0	0	acetyl-CoA synthetase [EC:6.2.1.1] Multiple pathways	IPR000873: AMP-dependent synthetase/ligase	AMP-binding
Bcin09g02890	0.0128604	0.0111788	0.0206462	0.0144158	SignalP-noTM	Unknown	0	0		IPR021851: Protein of unknown function DUF3455
Bcin09g02930			0.093277		none	Protease	0	0		IPR001461: Aspartic peptidase
Bcin09g03100			27.5588		TM	Unknown	0	0		IPR001680: WD40 repeat	WD40
Bcin09g03220	23.6601	7.04081		13.6328	none	Metabolism	0	0	fumarate hydratase, class II [EC:4.2.1.2] Multiple pathways	IPR000362: Fumarate lyase family
Bcin09g03410	3.2343		27.283	3.82776	none	DNA / RNA metabolism	0	0	ATP-dependent RNA helicase UAP56/SUB2 [EC:3.6.4.13] Multiple pathways	IPR011545: DEAD/DEAH box helicase domain
Bcin09g03430		0.0914875	0.0903565		SignalP-noTM	Metabolism	0	0	amidase [EC:3.5.1.4] AA metabolism	IPR000120: Amidase
Bcin09g03490			0.0591839		SignalP-noTM	FCWE Glucan metabolism	GH16	0		IPR000757: Glycoside hydrolase, family 16
Bcin09g03560			5.13203		none	Protein synthesis	0	0	nascent polypeptide-associated complex subunit alpha	IPR002715: Nascent polypeptide-associated complex NAC domain
Bcin09g03570			5.37969		none	Metabolism	0	0	F-type H+-transporting ATPase subunit d Oxidative phosphorylation	IPR008689: ATPase, F0 complex, subunit D, mitochondrial
Bcin09g03700			94.904		SignalP-TM	Metabolism	0	0		None	Antibiotic_NAT
Bcin09g03800			0		none	Unknown	0	0		IPR011008: Dimeric alpha-beta barrel	Dabb
Bcin09g03930			2.32333		none	Oxidoreduction	0	0	alkyl hydroperoxide reductase 1 [EC:1.11.1.15] Sulfur relay system	IPR012336: Thioredoxin-like fold
Bcin09g04020	0.00803297	0.00600603	0.00729317	0.0121628	SignalP-noTM	Other CAZy	CEnc	0		IPR013831: SGNH hydrolase-type esterase domain
Bcin09g04170			18.8563		none	Metabolism	0	0	hexokinase [EC:2.7.1.1] Multiple pathways	IPR001312: Hexokinase
Bcin09g04240			89.2849		none	Metabolism	0	0		IPR005999: Glycerol kinase	FGGY_C
Bcin09g04400			6.46312		none	Oxidoreduction	0	0	catalase [EC:1.11.1.6] multiple pathways	IPR011614: Catalase core domain
Bcin09g04410			0.124863		SignalP-noTM	Other CAZy	AA5, CBM32	0		IPR000421: Coagulation factor 5/8 C-terminal type domain
Bcin09g04440	0.0176503	0.0182282	0.00285685	0.0250717	SignalP-noTM	PCWDE_HP	GH51	0		IPR010720: Alpha-L-arabinofuranosidase, C-terminal
Bcin09g04450	15.737	10.278	25.2095	13.9211	none	Unknown	0	0		IPR001466: Beta-lactamase-related	Beta-lactamase
Bcin09g04570	0.0101042	0.0134196	0.0101439	0.0131724	SignalP-noTM	Other CAZy	AA3	0		IPR000172: Glucose-methanol-choline oxidoreductase, N-terminal
Bcin09g04790			0.085119		SignalP-noTM	Hemicellulose degradation	GH39	0		IPR000514: Glycoside hydrolase, family 39
Bcin09g05240	0.305209			0.380126	none	Transport	0	0		IPR003663: Sugar/inositol transporter	Sugar_tr
Bcin09g05250	0.0111052	0.0131668	0.0540307	0.0118618	SignalP-noTM	Unknown	0	0		IPR018620: Ubiquitin 3 binding protein But2, C-terminal
Bcin09g05400	0.0598285	0.0403747	0.0445401		none	Oxidoreduction	0	0		IPR006076: FAD dependent oxidoreductase	DAO
Bcin09g05740		2.22179			SignalP-noTM	Metabolism	0	0		IPR011118: Tannase/feruloyl esterase	Tannase
Bcin09g05760			6.339		none	Protein synthesis	0	0	elongation factor 1-alpha	IPR000795: Elongation factor, GTP-binding domain
Bcin09g06250			29.2883		none	Protein synthesis	0	0	translation initiation factor 1A	IPR001253: Translation initiation factor 1A (eIF-1A)
Bcin09g06410	5.11483		83.1483		none	Metabolism	0	0	2-isopropylmalate synthase [EC:2.3.3.13] Multiple pathways	IPR000891: Pyruvate carboxyltransferase
Bcin09g06420			3.14682		none	Transport	0	0	importin subunit beta-1	IPR001494: Importin-beta, N-terminal domain
Bcin09g06500			2.19631		none	Oxidoreduction	0	0	D-arabinono-1,4-lactone oxidase [EC:1.1.3.37] Unclassified: metabolism	IPR006094: FAD linked oxidase
Bcin09g06520	116.594	119.035			none	Metabolism	0	0	sedoheptulose-bisphosphatase [EC:3.1.3.37] Not Included in Pathway	IPR013078: Histidine phosphatase superfamily	His_Phos_1
Bcin09g06730			0.150901		SignalP-noTM	Cellulose degradation	AA9	0		IPR005103: Glycoside hydrolase, family 61
Bcin09g06750			0.277129		SignalP-noTM	Cellulose degradation	AA10	0		IPR005103: Glycoside hydrolase, family 62
Bcin09g07010			0.0445919		SignalP-noTM	Protease	0	0	gamma-glutamyltranspeptidase / glutathione hydrolase [EC:2.3.2.2 3.4.19.13] Multiple pathways	IPR000101: Gamma-glutamyltranspeptidase	Pfam: G_glu_transpept
Bcin09g07030			0.0461897		none	Metabolism	0	0		IPR016181: Acyl-CoA N-acyltransferase	Acetyltransf_1
Bcin10g00170			30.2388		none	Unknown	0	0		None	FAM184
Bcin10g00300				2.22576	none	Protein homeostasis	0	0	molecular chaperone HtpG Protein processing in ER	IPR001404: Heat shock protein Hsp90 family
Bcin10g00310	0.0720604	0.081423	0.0851031	0.119293	SignalP-noTM	FCWE Glucan metabolism	GH55	0		IPR012334: Pectin lyase fold
Bcin10g01020			0.0654224		SignalP-noTM	Unknown	0	0		None	Pfam: DUF697
Bcin10g01030			22.6773		none	Oxidoreduction	0	0	peroxiredoxin 5, atypical 2-Cys peroxiredoxin [EC:1.11.1.15] Peroxisome	IPR012336: Thioredoxin-like fold
Bcin10g01050			12.1135		none	Unknown	0	0		IPR000504: RNA recognition motif domain
Bcin10g01080	0.034582	0.0362513	0.0258076	0.063312	SignalP-noTM	Other CAZy	AA3	0		IPR000172: Glucose-methanol-choline oxidoreductase, N-terminal
Bcin10g01180			168.765		none	Transport	0	0	ATP-binding cassette, subfamily F, member 2	IPR003439: ABC transporter-like
Bcin10g01260			10.5464		none	Protein synthesis	0	0	large subunit ribosomal protein L13Ae	IPR005755: Ribosomal protein L13, eukaryotic/archaeal
Bcin10g01300	148.072	239.07	132.799		none	Unknown	0	0		IPR029063: S-adenosyl-L-methionine-dependent methyltransferase-like	Methyltransf_25
Bcin10g01380	9.79343	19.8938	153.109	10.0901	none	Unknown	0	0		IPR000504: RNA recognition motif domain
Bcin10g01510	4.39929	4.11417	6.64197		SignalP-noTM	Unknown	0	0		None	Pfam: Rhabdo_matrix
Bcin10g01530			10.3219		none	Metabolism	0	0		IPR003781: CoA-binding
Bcin10g01780				0.203697	SignalP-noTM	Unknown	0	0		IPR025331: Protein of unknown function DUF4237
Bcin10g01890	0.028101	0.0252031	0.00994942	0.0290708	SignalP-noTM	Protease	0	Yes		IPR000209: Peptidase S8/S53 domain
Bcin10g01990	5.98862		4520.17	4.83821	none	Metabolism	0	0		IPR001077: O-methyltransferase, family 2	Methyltransf_2
Bcin10g02230	5.43576	5.64276	149.57	4.97263	none	Traffic	0	0	GTP-binding protein SAR1 [EC:3.6.5.-] Protein processing in ER	IPR005225: Small GTP-binding protein domain
Bcin10g02290			22.4164		none	Protease	0	0	aspartyl aminopeptidase [EC:3.4.11.21]	IPR001948: Peptidase M18
Bcin10g02450	14.9835	22.228		18.9209	none	Metabolism	0	0	xylulokinase [EC:2.7.1.17] Pentose and glucuronate interconversions	IPR018484: Carbohydrate kinase, FGGY, N-terminal
Bcin10g02530	0.0440428	0.033184	0.00353691	0.039706	SignalP-noTM	Protease	0	Yes		IPR000209: Peptidase S8/S53 domain
Bcin10g03240	4.11622		62.9877		none	DNA / RNA metabolism	0	0	heterogeneous nuclear rnp K-like protein	IPR004087: K Homology domain
Bcin10g03450			5.52341		SignalP-noTM	Unknown	0	0		IPR021851: Protein of unknown function DUF3455	DUF3455
Bcin10g03630			36.0538		none	Unknown	0	0	protein TIF31	IPR011990: Tetratricopeptide-like helical domain
Bcin10g03730	8.21971	9.82947	7.99114	13.8076	SignalP-noTM	Protease	0	Yes		IPR005151: Tail specific protease
Bcin10g03820			50.4699	0.0479209	none	Protein synthesis	0	0	translation initiation factor 3 subunit A	IPR027512: Eukaryotic translation initiation factor 3 subunit A
Bcin10g03910	9.97562	20.2594	37.1553	8.35122	none	Protein homeostasis	0	0	ATP-dependent Clp protease ATP-binding subunit ClpB	IPR001270: ClpA/B family
Bcin10g03930			8.17985		none	Signaling	0	0	serine/threonine-protein phosphatase PP1 catalytic subunit [EC:3.1.3.16] mRNA and meiosis	IPR004843: Calcineurin-like phosphoesterase domain, apaH type	Metallophos
Bcin10g04170			30.6954		none	Unknown	0	0		None	None
Bcin10g04180	0.0148736	0.0160911	0.0372351	0.0136507	none	Unknown	0	0		None	None
Bcin10g04190	0.00683104	0.00847353	0.0974532		none	Other CAZY	AA5	0		IPR009880: Glyoxal oxidase, N-terminal	DUF1929
Bcin10g04220			414.354		none	Unknown	0	0		IPR011057: Mss4-like	TCTP
Bcin10g04290			14.9141		none	Protein synthesis	0	0	large subunit ribosomal protein L17e	IPR001063: Ribosomal protein L22/L17
Bcin10g04330	0.0495922	0.0560474	0.0614716	0.0948661	SignalP-noTM	Protease	0	Yes		IPR001563: Peptidase S10, serine carboxypeptidase
Bcin10g04580			4.21121		none	Traffic	0	0	protein transport protein SEC23 Protein processing in ER	IPR002035: von Willebrand factor, type A
Bcin10g04590			6.24616		none	Protein synthesis	0	0	large subunit ribosomal protein L12e	IPR000911: Ribosomal protein L11/L12
Bcin10g04610			157.303		none	Protein synthesis	0	0	small subunit ribosomal protein S7e	IPR000554: Ribosomal protein S7e
Bcin10g04650			10.1295		none	Unknown	0	0	protein-glutamate O-methyltransferase [EC:2.1.1.-]	IPR002791: Domain of unknown function DUF89
Bcin10g05010			0.126226		SignalP-noTM	Pectin degradation	GH28	0		IPR000743: Glycoside hydrolase, family 28
Bcin10g05050	2.83935				none	Protein homeostasis	0	0	26S proteasome regulatory subunit T2	IPR003593: AAA+ ATPase domain
Bcin10g05180			39.6897		none	Unknown	0	0	UV excision repair protein RAD23 Nucleotide excision repair Protein processing in ER	IPR000449: Ubiquitin-associated domain/translation elongation factor EF-Ts, N-terminal	XPC-binding
Bcin10g05230			20.4779		none	Metabolism	0	0		IPR004631: 4-aminobutyrate aminotransferase, eukaryotic
Bcin10g05400			126.901		none	Signaling	0	0	serine/threonine-protein phosphatase 2A regulatory subunit A mRNA, meiosis, cell cycle	IPR011989: Armadillo-like helical	HEAT
Bcin10g05410	6.92611	10.6882		8.57453	none	Protein synthesis	0	0	phenylalanyl-tRNA synthetase beta chain [EC:6.1.1.20]	IPR004531: Phenylalanyl-tRNA synthetase, class IIc, beta subunit, archae/euk cytosolic
Bcin10g05430			16.7145		none	Protein synthesis	0	0	small subunit ribosomal protein S3e	IPR001351: Ribosomal protein S3, C-terminal
Bcin10g05460	3.34608	4.46197		3.77536	none	Traffic	0	0	coatomer subunit delta	IPR008968: Clathrin adaptor, mu subunit, C-terminal
Bcin10g05550	7.72122			6.99569	none	Oxidoreduction	0	0	alcohol dehydrogenase (NADP+) [EC:1.1.1.2] multiple pathways	IPR002085: Alcohol dehydrogenase superfamily, zinc-type
Bcin10g05590			0.026171		SignalP-noTM	FCWE Glucan metabolism	GH3	0		IPR001764: Glycoside hydrolase, family 3, N-terminal
Bcin10g05630	0.0119225	0.0121577	0.0113489	0.0168684	SignalP-noTM	Other CAZy	GH3	0		IPR001764: Glycoside hydrolase, family 3, N-terminal
Bcin10g05640			21.4675		none	Cytoskeleton	0	0	microtubule-associated protein, RP/EB family	IPR001715: Calponin homology domain
Bcin10g05700			6.86075		SignalP-noTM	Unknown	0	0		None	None
Bcin10g05710			0.0700884		SignalP-noTM	Other CAZy	GH32	0		IPR001362: Glycoside hydrolase, family 32
Bcin10g06130	0.00537079	0.0121111	0.11048	0.0200238	SignalP-noTM	Pectin degradation	GH28	0		IPR000743: Glycoside hydrolase, family 28
Bcin11g00140		24.8707			none	Unknown	0	0		None	None
Bcin11g00170	1569.79	2127.57	40.954	1271.68	none	Metabolism	0	0	V-type H+-transporting ATPase subunit C Oxidative phosphorylation and Phagosome	IPR004907: ATPase, V1 complex, subunit C
Bcin11g00300	32.7458		76.296	34.2101	SignalP-noTM	Protease	0	0		IPR024079: Metallopeptidase, catalytic domain	Pfam: Aspzincin_M35
Bcin11g00440			5.48418		none	Oxidoreduction	0	0	homoserine dehydrogenase [EC:1.1.1.3] AA and secondary metabolites	IPR001342: Homoserine dehydrogenase, catalytic
Bcin11g01090	0.0145485		0.00712746		SignalP-noTM	Unknown	0	0		None	None
Bcin11g01370	31.8325	28.4506	23.1743	31.2655	SignalP-noTM	FCWE Glucan metabolism	GH55	0		IPR012334: Pectin lyase fold
Bcin11g01420	18.7775	22.9706	16.9336	20.5269	none	Metabolism	0	0		IPR000873: AMP-dependent synthetase/ligase	NAD_binding_4
Bcin11g01430	23.9083	34.6858	56.8391	40.1313	SignalP-noTM	PCWDE_HP	GH53	0		IPR011683: Glycosyl hydrolase family 53
Bcin11g01920			32.4459		none	Traffic	0	0	vacuolar protein sorting-associated protein 35 Endocytosis	IPR005378: Vacuolar protein sorting-associated protein 35, Vps35
Bcin11g02110			11.3481		none	Unknown	0	0	type I protein arginine methyltransferase [EC:2.1.1.319]	IPR010456: Ribosomal L11 methyltransferase, PrmA	PrmA
Bcin11g02130	4.70466	7.51735		5.37438	none	Metabolism	0	0	phosphoacetylglucosamine mutase [EC:5.4.2.3] Multiple pathways	IPR005844: Alpha-D-phosphohexomutase, alpha/beta/alpha domain I
Bcin11g02170	0.00848295	0.00819792	0.0015662	0.00865675	SignalP-noTM	Oxidoreduction	0	0		IPR002227: Tyrosinase copper-binding domain	Pfam: Tyrosinase
Bcin11g02180	0.0135425	0.0151646	0.0188743	0.016694	SignalP-noTM	PCWDE_HP	GH35	0		IPR001944: Glycoside hydrolase, family 35
Bcin11g02330	4.74118		47.0352		none	Traffic	0	0	coatomer subunit beta	IPR002553: Clathrin/coatomer adaptor, adaptin-like, N-terminal
Bcin11g02440			17.706		TM	Unknown	0	0		IPR003892: Ubiquitin system component Cue	CUE
Bcin11g02490				4.54812	none	Metabolism	0	0	phosphoglucomutase [EC:5.4.2.2] Multiple pathways	IPR005841: Alpha-D-phosphohexomutase superfamily
Bcin11g02610			4.13634		none	Unknown	0	0	obg-like ATPase 1	IPR004396: Ribosome-binding ATPase YchF/Obg-like ATPase 1
Bcin11g02710			8.97421	3.74689	none	Protein homeostasis	0	0	small glutamine-rich tetratricopeptide repeat-containing protein alpha	IPR001440: Tetratricopeptide TPR1
Bcin11g02830			20.7628		SignalP-noTM	Unknown	0	0		IPR002889: Carbohydrate-binding WSC
Bcin11g02900	0.0202253	0.0112009	0.00629427	0.0260044	SignalP-noTM	Protease	0	Yes		IPR001254: Peptidase S1
Bcin11g03020			674.45		none	Metabolism	0	0	galactokinase [EC:2.7.1.6] Multiple pathways	IPR000705: Galactokinase
Bcin11g03080			103.924		none	Lipid metabolism / Sterol	0	0	oxysterol-binding protein-related protein 9/10/11	IPR000648: Oxysterol-binding protein
Bcin11g03090	2.93473			2.93908	none	Metabolism	0	0	fructose-bisphosphate aldolase, class II [EC:4.1.2.13] Multiple pathways	IPR000771: Ketose-bisphosphate aldolase, class-II	F_bP_aldolase
Bcin11g03220			0.33344		none	Unknown	0	0		IPR013744: Protein of unknown function DUF1749	DUF1749
Bcin11g03520	5.65901	6.70468	10.8828	5.82847	none	Metabolism	0	0	S-adenosylmethionine synthetase [EC:2.5.1.6] Multiple pathways	IPR002133: S-adenosylmethionine synthetase
Bcin11g03970		0.282084		0.194284	none	Transport	0	0		IPR002075: Nuclear transport factor 2	NTF2
Bcin11g03990			141.785		none	Unknown	0	0		IPR021582: Protein of unknown function DUF3210	Aim21
Bcin11g04210	13.9327	36.6036		16.6084	none	Unknown	0	0		IPR007052: CS domain	CHORD
Bcin11g04420	3.91339	4.74754	6.36652		none	Protein synthesis	0	0	elongation factor 1-beta	IPR001326: Translation elongation factor EF1B, beta/delta chains, conserved site
Bcin11g04620	3.04162		5.74006	4.90249	none	Traffic	0	0	ADP-ribosylation factor 1	IPR005225: Small GTP-binding protein domain	Arf
Bcin11g04630	17.2009	26.2406		13.4342	none	Oxidoreduction	0	0	glyoxylate reductase [EC:1.1.1.26] Glyoxylate and secondary metabolites	IPR006139: D-isomer specific 2-hydroxyacid dehydrogenase, catalytic domain
Bcin11g04730			47.5387		SignalP-noTM	Unknown	0	0		IPR001283: Cysteine-rich secretory protein, allergen V5/Tpx-1-related	Pfam: CAP
Bcin11g04880	8.43257		28.004		none	Metabolism	0	0	V-type H+-transporting ATPase subunit H Oxidative phosphorylation and Phagosome	IPR004908: ATPase, V1 complex, subunit H
Bcin11g04890			Infinity	9.01903	none	Metabolism	0	0	aminomethyltransferase [EC:2.1.2.10] Multiple pathways	IPR006222: Glycine cleavage T-protein, N-terminal
Bcin11g05080	99.2831	99.1597		119.483	none	Oxidoreduction	0	0	pyridoxine 4-dehydrogenase [EC:1.1.1.65] Vitamin B6 metabolism	IPR001395: Aldo/keto reductase
Bcin11g05130			165.072		none	Signaling	0	0	protein-serine/threonine kinase [EC:2.7.11.-]	IPR000719: Protein kinase domain
Bcin11g05660			2.71997		none	Traffic	0	0	coatomer subunit zeta	IPR011012: Longin-like domain
Bcin11g05700			5.67451		none	Metabolism	0	0	hexokinase [EC:2.7.1.1] Multiple pathways	IPR001312: Hexokinase
Bcin11g05920	6.13994	8.76839	6.48268		none	Protein synthesis	0	0	large subunit ribosomal protein L9e	IPR000702: Ribosomal protein L6
Bcin11g06020			37.9341		none	Protein homeostasis	0	0	26S proteasome regulatory subunit T5	IPR003593: AAA+ ATPase domain
Bcin11g06110			153.741		none	Signaling	0	0		IPR000008: C2 domain	Pkinase
Bcin11g06120	0.175183	0.179752	0.12606		SignalP-noTM	Oxidoreduction	0	0		IPR006094: FAD linked oxidase, N-terminal	Pfam: FAD_binding_4
Bcin11g06140	7.5746		9.96883		none	Traffic	0	0	Chs5-Arf1p-binding protein BUD7/BCH1	IPR011990: Tetratricopeptide-like helical domain
Bcin11g06240	5.06933	5.81979	47.4816	6.70168	none	Metabolism	0	0	phosphoglycerate kinase [EC:2.7.2.3] Multiple pathways	IPR001576: Phosphoglycerate kinase
Bcin11g06400	0.002377	0.00299036	0.00256664	0.00305441	SignalP-noTM	Unknown	0	0		None	None
Bcin11g06440	0.0173182	0.0162207	0.044327	0.0275269	SignalP-noTM	Hemicellulose degradation	GH31	0		IPR000322: Glycoside hydrolase, family 31
Bcin12g00030			47.0897		none	DNA / RNA metabolism	0	0		IPR008030: NmrA-like domain (NmrA is a negative transcriptional regulator involved in the post-translational modification of the transcription factor AreA)
Bcin12g00090	0.0578876	0.0623333	0.0605274	0.116378	SignalP-noTM	Hemicellulose degradation	GH11, CBM1	0		IPR000254: Cellulose-binding domain, fungal
Bcin12g00180	0.0178257	0.0268049	0.032012	0.0320974	SignalP-noTM	Protease	0	Yes		IPR001461: Aspartic peptidase
Bcin12g00320	16.1643		19.3475		none	FCWE	GT15	0		IPR002685: Glycosyl transferase, family 15
Bcin12g00350			0.001563		SignalP-noTM	Unknown	0	0		None	None
Bcin12g00380	0.0218603	0.0206235	0.0256693	0.0311002	SignalP-noTM	Unknown	0	0		IPR011089: Domain of unknown function DUF1524
Bcin12g00520			5.09624		none	Oxidoreduction	0	0		IPR000866: Alkyl hydroperoxide reductase subunit C/ Thiol specific antioxidant	AhpC-TSA
Bcin12g00660			92.2601		none	Unknown	0	0		IPR003169: GYF	GYF
Bcin12g00700			0.00451896		TM	Transport	0	0		IPR001140: ABC transporter, transmembrane domain	ABC_membrane
Bcin12g00930	4.14801	11.3455	309.43		none	Unknown	CBM50	0		IPR008816: Glycine zipper 2TM domain IPR018392: LysM domain
Bcin12g00950	0.100895	0.0968734	0.0578146	0.150141	SignalP-noTM	Hemicellulose degradation	GH5.7	0		IPR001547: Glycoside hydrolase, family 5
Bcin12g00970			13.3985		none	Metabolism	0	0		IPR004045: Glutathione S-transferase, N-terminal
Bcin12g01270			0.0520945		SignalP-noTM	Protease	0	0		IPR001461: Aspartic peptidase
Bcin12g01300			9.80662		none	Protein synthesis	0	0	small subunit ribosomal protein S17e	IPR001210: Ribosomal protein S17e
Bcin12g01350	6.79892	10.2605	34.1724	5.90757	none	Protein homeostasis	0	0	ubiquitin-activating enzyme E1 [EC:6.2.1.45]	IPR000127: Ubiquitin-activating enzyme repeat
Bcin12g01410	12.0526	44.786	74.9288	12.0217	none	Protease	0	0		IPR002933: Peptidase M20	Peptidase_M20
Bcin12g01520	0.359935		0.159947		SignalP-noTM	Other CAZy	AA5	0		IPR009880: Glyoxal oxidase, N-terminal
Bcin12g01860			7.94692		none	Metabolism	0	0	UDP-glucose 4-epimerase [EC:5.1.3.2] Multiple pathways	IPR001509: NAD-dependent epimerase/dehydratase, N-terminal domain	GDP_Man_Dehyd
Bcin12g01870			10.0487		none	Oxidoreduction	0	0		IPR002085: Alcohol dehydrogenase superfamily, zinc-type	ADH_zinc_N
Bcin12g02040	0.0012599	0.00138955	0.00059451	0.00188898	SignalP-noTM	Protease	0	Yes		IPR001461: Aspartic peptidase
Bcin12g02190			0.0306833		SignalP-noTM	Lipid metabolism	0	0		IPR002018: Carboxylesterase, type B	Pfam: COesterase
Bcin12g02910			0.0240649		SignalP-noTM	Other CAZy	AA3, AA8	0		IPR000172: Glucose-methanol-choline oxidoreductase, N-terminal
Bcin12g03100	25.3265				none	Unknown	0	0		IPR004013: PHP, C-terminal	PHP
Bcin12g03150	4.2971	3.40822	4.49262	3.98192	none	Protein homeostasis	0	0	26S proteasome regulatory subunit N1	IPR002015: Proteasome/cyclosome repeat
Bcin12g03180			6.5007		none	Oxidoreduction	0	0	NADPH-ferrihemoprotein reductase [EC:1.6.2.4] Unclassified: metabolism	IPR001094: Flavodoxin
Bcin12g03270	15.702	19.3354	24.5952	12.59	SignalP-noTM	Protease	0	0		IPR007484: Peptidase M28	Pfam: Peptidase_M28
Bcin12g03390	0.0194795	0.0203786	0.0183987	0.0270079	SignalP-noTM	Other CAZy	GH15, CBM20	0		IPR000165: Glucoamylase
Bcin12g03520	3.93512	3.35598		4.356	SignalP-noTM	Unknown	0	0		IPR011042: Six-bladed beta-propeller, TolB-like	None
Bcin12g03550			34.7759		SignalP-noTM	Stress & virulence factor	0	0		IPR009009: RlpA-like double-psi beta-barrel domain
Bcin12g03690	2.37624	2.5202			TM	Metabolism	0	0		IPR011045: Nitrous oxide reductase, N-terminal	Lactonase
Bcin12g03740			16.1911		none	Oxidoreduction	0	0	sulfite reductase (NADPH) hemoprotein beta-component [EC:1.8.1.2] Sulfur metabolism	IPR001094: Flavodoxin
Bcin12g03880	5.38457			4.29484	none	Signaling	0	0	serine/threonine-protein phosphatase 2A catalytic subunit [EC:3.1.3.16] Multiple pathways	IPR004843: Calcineurin-like phosphoesterase domain, apaH type	Metallophos
Bcin12g04060			0.013909		none	Metabolism	0	0	gephyrin [EC:2.10.1.1 2.7.7.75] Folate biosynthesis	IPR001453: Molybdopterin binding domain
Bcin12g04180			77.5181		none	Metabolism	0	0	L-histidine Nalpha-methyltransferase / hercynylcysteine S-oxide synthase [EC:2.1.1.44 1.14.99.51] Histidine metabolism	IPR017804: Methyltransferase EgtD-like
Bcin12g04380			9.3188		none	Unknown	0	0	elongation factor 3	IPR003439: ABC transporter-like
Bcin12g04530	0.0745205	0.0514372	0.0101837	0.046101	SignalP-noTM	Pectin degradation	GH28	0		IPR000743: Glycoside hydrolase, family 28
Bcin12g04560	0.213837			0.254849	none	Metabolism	0	0	aminoacyl tRNA synthase complex-interacting multifunctional protein 1	IPR002547: tRNA-binding domain
Bcin12g04640	0.00367075	0.00377916	0.0171551	0.00515531	SignalP-noTM	Oxidoreduction	0	0		IPR006094: FAD linked oxidase, N-terminal	Pfam: FAD_binding_4
Bcin12g04660			66.441		none	Protein homeostasis	0	0	T-complex protein 1 subunit alpha	IPR002194: Chaperonin TCP-1, conserved site
Bcin12g04670			27.9171		none	Protein synthesis	0	0		IPR002314: Aminoacyl-tRNA synthetase, class II (G/ H/ P/ S), conserved domain	ProRS-C_1
Bcin12g04680	109.644	119.929	6.21123	117.487	none	Signaling	0	0	classical protein kinase C alpha type [EC:2.7.11.13]	IPR000008: C2 domain
Bcin12g04690			26.414		none	Metabolism	0	0		IPR006089: Acyl-CoA dehydrogenase, conserved site	Acyl-CoA_dh_1
Bcin12g04740			3.24033		SignalP-noTM	Other CAZy	GH128	0		IPR013781: Glycoside hydrolase, catalytic domain
Bcin12g04860	0.452531				none	Metabolism	0	0	carbamoyl-phosphate synthase / aspartate carbamoyltransferase [EC:6.3.5.5 2.1.3.2] Multiple pathways	IPR002082: Aspartate carbamoyltransferase
Bcin12g05290	23.0431	72.9935		39.6511	none	Protein synthesis	0	0	glutaminyl-tRNA synthetase [EC:6.1.1.18]	IPR000924: Glutamyl/glutaminyl-tRNA synthetase
Bcin12g05330	4.99496		7.45492		none	Unknown	0	0		IPR014830: Glycolipid transfer protein domain	GLTP
Bcin12g05420		15.8662	25.4401	11.174	none	Oxidoreduction	0	0		IPR015590: Aldehyde dehydrogenase domain	Aldedh
Bcin12g05640	17.0167	18.0337	127.721	14.6744	none	Oxidoreduction	0	0		IPR002085: Alcohol dehydrogenase superfamily, zinc-type	ADH_zinc_N
Bcin12g05730			42.0276		none	Metabolism	0	0	pyruvate dehydrogenase E2 component (dihydrolipoamide acetyltransferase) [EC:2.3.1.12] Multiple pathways	IPR000089: Biotin/lipoyl attachment
Bcin12g05780			156.991		none	Unknown	0	0		IPR001251: CRAL-TRIO domain	CRAL_TRIO
Bcin12g05790	8.88789	11.6695		19.7703	none	Protein homeostasis	0	0		IPR013886: PI31 proteasome regulator	PI31_Prot_N
Bcin12g06000			19.59		none	Transport	0	0	importin-9	IPR001494: Importin-beta, N-terminal domain
Bcin12g06300			0.0462569		SignalP-noTM	Protease	0	Yes		IPR001384: Peptidase M35, deuterolysin
Bcin12g06460			0.128925		none	Metabolism	0	0		IPR002925: Dienelactone hydrolase	DLH
Bcin12g06630	7.51754	8.11166	10.5937	12.1903	SignalP-noTM	Cellulose degradation	GH45	0		IPR000334: Glycoside hydrolase, family 45
Bcin12g06710				0.0543654	SignalP-noTM	Protease	0	0		IPR001261: ArgE/DapE/ACY1/CPG2/YscS, conserved site	Pfam: M20_dimer
Bcin12g06770	39.7783	65.5364	23.2933	80.4911	SignalP-noTM	Unknown	0	0		IPR011042: Six-bladed beta-propeller, TolB-like	None
Bcin13g00050	0.00198568	0.00417891		0.00750498	SignalP-noTM	Unknown	0	0		None	Pfam: DUF3623
Bcin13g00230	22.7209	39.9414	26.4304	27.1492	none	Protein synthesis	0	0	asparaginyl-tRNA synthetase [EC:6.1.1.22]	IPR002312: Aspartyl/Asparaginyl-tRNA synthetase, class IIb
Bcin13g00300			0.0142636		SignalP-noTM	Unknown	0	0		None	None
Bcin13g00380	0.0615239	0.107035	0.0154906	0.0495963	SignalP-noTM	Unknown	0	0		None	Pfam: AglB_L1
Bcin13g00550			36.5067		none	Protease	0	0		IPR000994: Peptidase M24, structural domain	Peptidase_M24
Bcin13g01330	63.5861	109.868	6.57209		none	Metabolism	0	0	5'-methylthioadenosine phosphorylase [EC:2.4.2.28] Cysteine and methionine metabolism	IPR018099: Purine phosphorylase,
Bcin13g01410			0.0404735		SignalP-noTM	Unknown	0	0		IPR000731: Sterol-sensing domain
Bcin13g01450	66.4199	105.4		74.4557	none	Unknown	0	0		IPR018829: Domain of unknown function DUF2433	DUF2433
Bcin13g01610				15.3548	none	Metabolism	0	0	alanine transaminase [EC:2.6.1.2] Multiple pathways	IPR004839: Aminotransferase, class I/classII
Bcin13g01630	2.48506	4.26626			none	Protein homeostasis	0	0	26S proteasome regulatory subunit N7	IPR000717: Proteasome component (PCI) domain
Bcin13g01730			33.827		none	Metabolism	0	0	3'(2'), 5'-bisphosphate nucleotidase [EC:3.1.3.7] Sulfur metabolism	IPR000760: Inositol monophosphatase	Inositol_P
Bcin13g01760			29.3516		none	Unknown	0	0		None	FAM184
Bcin13g01770	0.292942		0.00386246	0.280078	SignalP-noTM	Unknown	0	0		None	None
Bcin13g02010	7.08604	10.398	35.6359	10.6149	SignalP-noTM	Oxidoreduction	0	0		IPR008972: Cupredoxin	Pfam: SoxE
Bcin13g02070	0.0143845	0.0230674	0.0150048	0.027604	none	Unknown	0	0		None	None
Bcin13g02080			0.0200502		none	Unknown	0	0		None	Lebercilin
Bcin13g02100	0.0131732	0.0160729	0.008394	0.0227452	SignalP-noTM	Cellulose degradation	GH7, CBM1	0		IPR000254: Cellulose-binding domain, fungal
Bcin13g02240			571.496		none	Transport	0	0	importin-4	IPR001494: Importin-beta, N-terminal domain
Bcin13g02320	6.07654	9.7696		4.51448	SignalP-noTM	PCWDE_HC	GH12, CBM1	0		IPR013319: Glycoside hydrolase, family 11/12
Bcin13g02330	0.0735269	0.116581	0.211332	0.207697	SignalP-noTM	FCWE Glucan metabolism	GH72	0		IPR004886: Glucanosyltransferase
Bcin13g02410			66.9746		none	Protein homeostasis	0	0	ubiquitin-like 1-activating enzyme E1 B [EC:6.2.1.45]	IPR000127: Ubiquitin-activating enzyme repeat
Bcin13g02430	4.45474		14.9185	4.69578	none	Unknown	0	0		IPR013650: ATP-grasp fold, succinyl-CoA synthetase-type	Citrate_bind
Bcin13g02440	7.08385	5.98216	11.4824	8.24306	none	Metabolism	0	0	ATP citrate (pro-S)-lyase [EC:2.3.3.8] Multiple pathways	IPR002020: Citrate synthase-like
Bcin13g02640			6.04812		SignalP-noTM	Pectin degradation	GH28	0		IPR000743: Glycoside hydrolase, family 28
Bcin13g02960	0.0561667	0.0254809	0.0261157	0.0296617	SignalP-noTM	Protease	0	Yes		IPR000834: Peptidase M14, carboxypeptidase A
Bcin13g03410	5.705	7.05781	6.5609	9.09726	SignalP-noTM	Lipid metabolism	0	0		IPR005065: Platelet-activating factor acetylhydrolase	Pfam: PAF-AH_p_II
Bcin13g03450			10.5532		none	Oxidoreduction	0	0	sulfite reductase (NADPH) flavoprotein alpha-component [EC:1.8.1.2] Sulfur metabolism	IPR001433: Oxidoreductase FAD/NAD(P)-binding
Bcin13g03620	17.8453	23.6584	122.545	10.5426	SignalP-TM	Unknown	0	0		IPR002889: Carbohydrate-binding WSC	WSC
Bcin13g03680			0.287027		SignalP-noTM	Oxidoreduction	0	0		IPR002016: Haem peroxidase, plant/fungal/bacterial	Pfam: peroxidase
Bcin13g03720			0.0119414		SignalP-noTM	Oxidoreduction	0	0		IPR015889: Intradiol ring-cleavage dioxygenase, core	Pfam: Dioxygenase_C
Bcin13g03880			6.44504		none	Metabolism	0	0	adenylosuccinate lyase [EC:4.3.2.2] multiple pathways	IPR000362: Fumarate lyase family
Bcin13g03950	0.0433927	0.0501541	0.0391096	0.0915957	SignalP-noTM	PCWDE_HP	GH54, CBM42	0		IPR007934: Alpha-L-arabinofuranosidase B
Bcin13g03990	37.1738	64.859	108.125	36.366	none	DNA / RNA metabolism	0	0		IPR004087: K Homology domain	KH_1
Bcin13g04540			17.6118		none	Protein synthesis	0	0	isoleucyl-tRNA synthetase [EC:6.1.1.5]	IPR001412: Aminoacyl-tRNA synthetase, class I, conserved site
Bcin13g04640			0.248351		none	Oxidoreduction	0	0		IPR002198: Short-chain dehydrogenase/reductase SDR	adh_short
Bcin13g04830			796.032		none	Traffic	0	0	signal transducing adaptor molecule Endocytosis	IPR001452: SH3 domain
Bcin13g04850	0.0691976	0.0507402	0.117035	0.127188	SignalP-noTM	Pectin degradation	GH78	0		IPR008902: Bacterial alpha-L-rhamnosidase
Bcin13g05020	13.7318	12.9067	20.0714	14.7128	none	Metabolism	0	0	threonine synthase [EC:4.2.3.1] Multiple pathways	IPR000634: Serine/threonine dehydratase, pyridoxal-phosphate-binding site
Bcin13g05110	0.0839174	0.111107	0.171938	0.13535	SignalP-noTM	Other CAZy	GH13	0		IPR006047: Glycosyl hydrolase, family 13, catalytic domain
Bcin13g05370	7.84823		107.496		none	Metabolism	0	0	mannose-1-phosphate guanylyltransferase [EC:2.7.7.13] Multiple pathways	IPR001451: Bacterial transferase hexapeptide repeat
Bcin13g05530	3.16599				none	Cytoskeleton	0	0	actin-related protein 3	IPR004000: Actin-related protein
Bcin13g05550			843.067		none	DNA / RNA metabolism	0	0	transcription initiation factor TFIIH subunit 3	IPR004600: TFIIH subunit Tfb4/p34
Bcin13g05580			15.8728	5.7726	none	Oxidoreduction	0	0	alcohol dehydrogenase, propanol-preferring [EC:1.1.1.1] multiple pathways	IPR002085: Alcohol dehydrogenase superfamily, zinc-type
Bcin13g05610	13.4508	15.1123		14.6261	none	Cytoskeleton	0	0	capping protein (actin filament) muscle Z-line, alpha	IPR002189: F-actin-capping protein subunit alpha
Bcin13g05770	0.0184532	0.0103111	0.0611147	0.0392536	none	Unknown	0	0		IPR014870: Domain of unknown function DUF1793	DUF4965
Bcin14g00120	11.0694	13.1373	8.56873	8.96668	none	Cytoskeleton	0	0	actin-related protein 2	IPR004000: Actin-related protein
Bcin14g00180	8.30968		8.60664	8.61292	none	Metabolism	0	0	mannose-6-phosphate isomerase [EC:5.3.1.8] Multiple pathways	IPR001250: Mannose-6-phosphate isomerase, type I	PMI_typeI
Bcin14g00390	9.47707		2.86001		SignalP-noTM	Unknown	0	0		None	None
Bcin14g00480			27.6068		none	Other CAZY	GH3	0		IPR001764: Glycoside hydrolase, family 3, N-terminal
Bcin14g00650	0.0408665	0.0229752	0.0266471		SignalP-noTM	Hemicellulose degradation	GH31	0		IPR000322: Glycoside hydrolase, family 31
Bcin14g00810	0.00902747	0.00824156	0.00972905	0.00819073	SignalP-noTM	Unknown	0	0		IPR011042: Six-bladed beta-propeller, TolB-like	Pfam: Phytase-like
Bcin14g00820	3.80775		9.04016		none	Transport	0	0	exportin-1 Multiple pathways	IPR011989: Armadillo-like helical	CRM1_C
Bcin14g00850	15.4802	18.2816	10.0193	16.8183	SignalP-noTM	Pectin degradation	GH28	0		IPR000743: Glycoside hydrolase, family 28
Bcin14g00860			0.443198		SignalP-noTM	Pectin degradation	CE8	0		IPR000070: Pectinesterase, catalytic
Bcin14g01030			26.8388		none	Oxidoreduction	0	0	S-(hydroxymethyl)glutathione dehydrogenase / alcohol dehydrogenase [EC:1.1.1.284 1.1.1.1] multiple pathways	IPR002085: Alcohol dehydrogenase superfamily, zinc-type
Bcin14g01200			0.018416		SignalP-noTM	Unknown	0	0		None	None
Bcin14g01530			56.8159		none	Oxidoreduction	0	0		IPR006089: Acyl-CoA dehydrogenase, conserved site	Acyl-CoA_dh_1
Bcin14g01540			0.263866		none	Metabolism	0	0	adenosine deaminase CECR1 [EC:3.5.4.4] Purine metabolism	IPR001365: Adenosine/AMP deaminase domain
Bcin14g01630			0.0344025		SignalP-noTM	Pectin degradation	PL1	0		IPR002022: Pectate lyase/Amb allergen
Bcin14g01700	0.00378352	0.00856975	0.122992		SignalP-noTM	Cellulose degradation	GH6, CBM1	0		IPR000254: Cellulose-binding domain, fungal
Bcin14g01710	21.3311	11.9832		16.9898	none	Other CAZY	GT8	0		IPR002495: Glycosyl transferase, family 8	Glyco_transf_8
Bcin14g01980	3.62363	5.4846		4.09763	none	Metabolism	0	0	transketolase [EC:2.2.1.1] Multiple pathways	IPR005474: Transketolase, N-terminal
Bcin14g02130			677.158		none	Signaling	0	0	CDK inhibitor PHO81	IPR002110: Ankyrin repeat	Ank_2
Bcin14g02510	0.0103786	0.0086848	0.0222719	0.00949004	SignalP-noTM	Oxidoreduction (Laccase)	AA1	0		IPR001117: Multicopper oxidase, type 1
Bcin14g02720	3.173	3.0475			none	Metabolism	0	0	cysteine desulfurase [EC:2.8.1.7] Multiple pathways	IPR000192: Aminotransferase class V domain
Bcin14g02850		5.46223			none	Unknown	0	0		None	NuiA
Bcin14g03010			29.3568		none	Signaling	0	0	guanine nucleotide-binding protein subunit beta-2-like 1 protein	IPR001680: WD40 repeat
Bcin14g03100	12.7724		67.5935		none	Transport	0	0	ATP-dependent RNA helicase DDX19/DBP5 [EC:3.6.4.13]	IPR001650: Helicase, C-terminal	DEAD
Bcin14g03170			0.146033		SignalP-noTM	Metabolism	0	0		IPR006992: Amidohydrolase 2	Pfam: Amidohydro_2
Bcin14g03390			15.2752		none	Metabolism	0	0	glutamine synthetase [EC:6.3.1.2] Multiple pathways	IPR008146: Glutamine synthetase, catalytic domain
Bcin14g03430			0.132772		SignalP-noTM	Pectin degradation	PL1	0		IPR002022: Pectate lyase/Amb allergen
Bcin14g03500	5.71413				none	Protein synthesis	0	0	translation initiation factor 2 subunit 2	IPR002735: Translation initiation factor IF2/IF5
Bcin14g03630				37.8791	none	Signaling	0	0		IPR008207: Signal transduction histidine kinase, phosphotransfer (Hpt) domain
Bcin14g03700			15.9939		none	Unknown	0	0		IPR000182: GNAT domain	Acetyltransf_1
Bcin14g03970	0.44441				SignalP-noTM	FCWE Glucan metabolism	GH72	0		IPR004886: Glucanosyltransferase
Bcin14g04050	0.0333385				none	Unknown	0	0		IPR002848: Translin	Translin
Bcin14g04230			19.6142		none	Protein synthesis	0	0	large subunit ribosomal protein L5e	IPR005484: Ribosomal protein L18/L5
Bcin14g04350			54.0885		none	Unknown	0	0		None	TetR_C_36
Bcin14g04450			0.0208842		none	Unknown	0	0		None	None
Bcin14g04550			19.3149		none	Unknown	0	0		IPR000008: C2 domain	PS_Dcarbxylase
Bcin14g04560			0.0869918		SignalP-noTM	Other CAZy	CEnc	0		IPR013830: SGNH hydrolase-type esterase domain
Bcin14g04650			24.5133		none	Traffic	0	0	protein transport protein SEC31 Protein processing in ER	IPR001680: WD40 repeat
Bcin14g05510	0.00805857	0.00686652	0.00362457	0.0108676	SignalP-noTM	PCWDE_HP	GH62	0		IPR005193: Glycoside hydrolase, family 62, arabinosidase
Bcin14g05570	0.0629438	0.0965789	0.0323836		SignalP-noTM	Oxidoreduction	0	0		IPR002227: Tyrosinase copper-binding domain	Pfam: Tyrosinase
Bcin15g00100	0.00216072	0.0058124	0.00184339	0.00396267	SignalP-noTM	Stress & virulence factor	0	0		None	Pfam: zinc_ribbon_16
Bcin15g00130	0.355077	0.345072	0.129558	0.375639	SignalP-noTM	Cuticle degradation	CE5	0	acetylxylan esterase [EC:3.1.1.72] Not Included in Pathway	IPR000675: Cutinase	Pfam: Cutinase
Bcin15g00510			0.215004		none	Metabolism	0	0	cytidine deaminase [EC:3.5.4.5] Pyrimidine metabolism	IPR002125: CMP/dCMP deaminase, zinc-binding
Bcin15g00520			0.0247524		none	Unknown	0	0		None	LEA_2
Bcin15g00550	7.7279				none	Unknown	0	0		IPR029069: HotDog domain	4HBT_2
Bcin15g00590			94.0876		none	Protein homeostasis	0	0		IPR011044: Quinoprotein amine dehydrogenase, beta chain-like	VID27
Bcin15g00810			0.224348		SignalP-TM	Signaling	0	0	cell wall integrity and stress response component MAPK signaling pathway - yeast	IPR002889: Carbohydrate-binding WSC
Bcin15g00980	12.1291	12.2999			none	Protein homeostasis	0	0	26S proteasome regulatory subunit N12	IPR005062: SAC3/GANP/Nin1/mts3/eIF-3 p25
Bcin15g01030	0.151884	0.171839	0.168172	0.202761	SignalP-noTM	PCWDE_HP	CE1, CBM1	0		IPR010126: Esterase, PHB depolymerase IPR029058: Alpha/Beta hydrolase fold IPR000254: Cellulose-binding domain, fungal
Bcin15g01120			21.1793		none	Metabolism	0	0	F-type H+-transporting ATPase subunit alpha Oxidative phosphorylation	IPR000194: ATPase, F1/V1/A1 complex, alpha/beta subunit, nucleotide-binding domain
Bcin15g01150			71.4486		SignalP-noTM	Traffic	0	0		IPR006581: VPS10
Bcin15g01350	50.2083	47.3438	110.806	27.0292	TM	Traffic	0	0	protein SEY1 [EC:3.6.5.-]	IPR008803: RHD3/Sey1	RHD3
Bcin15g01570			7.89912		none	Protease	0	0	dipeptidyl aminopeptidase [EC:3.4.14.-]	IPR001375: Peptidase S9, prolyl oligopeptidase, catalytic domain
Bcin15g01600	0.0145898	0.0143801	0.0145802	0.0242982	SignalP-noTM	Hemicellulose degradation	GH11	0		IPR001137: Glycoside hydrolase, family 11
Bcin15g01730		8.39824		12.492	SignalP-TM	Oxidoreduction	0	0		IPR008972: Cupredoxin	No
Bcin15g01990			0.0165232		SignalP-noTM	Oxidoreduction	0	0		IPR008972: Cupredoxin	Pfam: Cu_bind_like
Bcin15g02080			15.0457		none	Metabolism	0	0	F-type H+-transporting ATPase subunit beta [EC:7.1.2.2] Oxidative phosphorylation	IPR000194: ATPase, F1/V1/A1 complex, alpha/beta subunit, nucleotide-binding domain
Bcin15g02090	5.28498			9.28205	none	Other CAZY	GH13, CBM48	0		IPR006048: Alpha-amylase, C-terminal all beta
Bcin15g02120			3.98374		none	Metabolism	0	0	glyceraldehyde 3-phosphate dehydrogenase [EC:1.2.1.12] Multiple pathways	IPR006424: Glyceraldehyde-3-phosphate dehydrogenase, type I
Bcin15g02180			396.954		none	Unknown	0	0		IPR015943: WD40/YVTN repeat-like-containing domain	Ge1_WD40
Bcin15g02270			205.202		none	Metabolism	GT3	0	glycogen synthase [EC:2.4.1.11] Starch and sucrose metabolism	IPR008631: Glycogen synthase
Bcin15g02380	0.00018985	0.000427007	0.000402539	0.000792277	SignalP-noTM	Protease	0	Yes		IPR000250: Peptidase G1
Bcin15g02440			0.0358175		SignalP-noTM	Other CAZy	GH3, CBM1	0		IPR000254: Cellulose-binding domain, fungal
Bcin15g02460				7.23056	none	Metabolism	0	0	glutamate synthase (NADH) [EC:1.4.1.14] Multiple pathways	IPR000583: Class II glutamine amidotransferase domain
Bcin15g02540			0.00556681		SignalP-noTM	Oxidoreduction	0	0		IPR012951: Berberine/berberine-like	Pfam: FAD_binding_4
Bcin15g02610	2.95784		14.1124		none	Cytoskeleton	0	0	cell division control protein 12	IPR000038: Cell division protein GTP binding
Bcin15g02970			5.76003		none	DNA / RNA metabolism	0	0	5'-3' exoribonuclease 1 [EC:3.1.13.-] Multiple pathways	IPR027073: 5'-3' exoribonuclease
Bcin15g03060	0.0201812		0.118537	0.0151925	none	Unknown	0	0		IPR009291: Vacuolar protein sorting-associated protein 62	Vps62
Bcin15g03070	6.56514	8.21809	4.52427	14.0576	SignalP-noTM	FCWE Chitin metabolism	GH16	0		IPR000757: Glycoside hydrolase, family 16
Bcin15g03080	25.2655			27.6779	SignalP-noTM	Cuticle degradation	CE5	0		IPR000675: Cutinase
Bcin15g03150	0.00341309	0.00393549	0.000993502	0.0045124	SignalP-noTM	Protease	0	0	tripeptidyl-peptidase I [EC:3.4.14.9]	IPR000209: Peptidase S8/S53 domain	Pfam: Pro-kuma_activ
Bcin15g03290	3.4624	5.16866	32.6956	3.55811	none	Traffic	0	0	drebrin-like protein Membrane trafficking	IPR001452: SH3 domain
Bcin15g03310	0.122665			0.38014	none	Oxidoreduction	0	0		IPR002109: Glutaredoxin	Glutaredoxin
Bcin15g03320	0.246685	0.404934	0.24499		SignalP-noTM	Metabolism	0	0	acid phosphatase [EC:3.1.3.2] Multiple pathways	IPR007312: Phosphoesterase	Pfam: Phosphoesterase
Bcin15g03470			0.0283971		SignalP-noTM	Lipid metabolism	0	0		IPR003172: MD-2-related lipid-recognition domain	Pfam: E1_DerP2_DerF2
Bcin15g03540			77.8929		none	DNA / RNA metabolism	0	0	SWI/SNF related-matrix-associated actin-dependent regulator of chromatin subfamily C	IPR001005: SANT/Myb domain	SWIRM
Bcin15g03580			35.9792		none	Signaling	0	0	p38 MAP kinase [EC:2.7.11.24]	IPR000719: Protein kinase domain
Bcin15g03600			8.39005		none	Protein homeostasis	0	0	cullin 1 Cell cycle / Ub-proteolysis / Protein processing in ER	IPR001373: Cullin, N-terminal
Bcin15g03620	8.86421	8.45019	4.17652	6.50712	none	Other CAZY	GT35	0		IPR000811: Glycosyl transferase, family 35
Bcin15g03630			0.190201		none	Oxidoreduction	0	0		IPR002198: Short-chain dehydrogenase/reductase SDR	adh_short_C2
Bcin15g03640	35.2735	31.3184		39.4042	none	Oxidoreduction	0	0		IPR006094: FAD linked oxidase, N-terminal	FAD_binding_4
Bcin15g03770			135.33		none	Unknown	0	0		IPR001841: Zinc finger, RING-type	zf-RING_2
Bcin15g03930			3.63718		none	Unknown	0	0		IPR005344: Uncharacterised protein family UPF0121	UPF0121
Bcin15g04430	195.741	99.4965		496.275	none	Metabolism	0	0		IPR013216: Methyltransferase type 11	Methyltransf_11
Bcin15g04490			16.4882		none	Protein synthesis	0	0	translation initiation factor 3 subunit D	IPR007783: Eukaryotic translation initiation factor 3 subunit D
Bcin15g04670	0.0201307	0.0210984	0.00599565	0.0261653	SignalP-noTM	Protease	0	Yes		IPR000209: Peptidase S8/S53 domain
Bcin15g05030			0.348459		SignalP-noTM	Pectin degradation	GH28	0		IPR000743: Glycoside hydrolase, family 28
Bcin15g05240			42.6757		none	Traffic	0	0	ADP-ribosylation factor GTPase-activating protein 2/3 Endocytosis	IPR001164: Arf GTPase activating protein
Bcin15g05420			61.8433		none	Traffic	0	0		IPR018859: BAR domain-containing family	BAR_2
Bcin15g05510	10.2221	10.5581	11.6467	19.6415	SignalP-noTM	Lipid metabolism	0	0		IPR002018: Carboxylesterase, type B	Pfam: COesterase
Bcin15g05580	4.69098	4.95162		7.99432	SignalP-noTM	Oxidoreduction	0	0		IPR006094: FAD linked oxidase, N-terminal	Pfam: FAD_binding_4
Bcin15g05610	5.25268		51.7844	5.85576	none	Traffic	0	0	coatomer subunit beta'	IPR001680: WD40 repeat
Bcin15g05700			4.07759		SignalP-noTM	Unknown	0	0		IPR002018: Carboxylesterase, type B
Bcin16g00080	0.0177864	0.0201518	0.0174448	0.0231947	SignalP-noTM	Oxidoreduction	0	0		IPR006094: FAD linked oxidase, N-terminal	Pfam: FAD_binding_4
Bcin16g00490			Infinity		none	Signaling	0	0	cyclin-dependent kinase [EC:2.7.11.22]	IPR000719: Protein kinase domain
Bcin16g00930			0.0550284		SignalP-noTM	Unknown	0	0		None	None
Bcin16g00950			20.6947		SignalP-noTM	Unknown	0	0		IPR001002: Chitin-binding, type 1
Bcin16g00960	44.8479	89.7721	24.9667	50.0979	none	Cytoskeleton	0	0	coronin-1B/1C/6	IPR001680: WD40 repeat
Bcin16g01550	11.5507	25.7379	38.4752	21.5067	none	Unknown	0	0		IPR014756: Immunoglobulin E-set	AMPK1_CBM
Bcin16g01590			113.635	7.41839	SignalP-noTM	FCWE Chitin metabolism	GH18, CBM1	0		IPR000254: Cellulose-binding domain, fungal
Bcin16g01630			0.0173328		SignalP-noTM	Unknown	0	0		IPR000772: Ricin B lectin domain	Ricin_B_lectin
Bcin16g01640	0.0182508	0.0245541	44.0503	0.025839	none	Protein homeostasis	0	0	T-complex protein 1 subunit theta	IPR002423: Chaperonin Cpn60/TCP-1
Bcin16g01950			4.89052		SignalP-noTM	Other CAZy	GH63	0		IPR004888: Glycoside hydrolase, family 63
Bcin16g02020	3.10257		10.1869		none	Cytoskeleton	0	0	actin beta/gamma 1	IPR004000: Actin-related protein
Bcin16g02130	0.0230937	0.0184919	0.0435113	0.0317042	SignalP-noTM	Lipid metabolism	0	0		IPR002018: Carboxylesterase, type B	Pfam: COesterase
Bcin16g02340			0.0673662		none	Unknown	0	0		IPR009297: Protein of unknown function DUF952	DUF952
Bcin16g02430	7.00995	10.7085	24.0039	8.06821	SignalP-noTM	Other CAZy	GHnc	0		None	Pfam: Lysozyme_like
Bcin16g02560			0.132754		SignalP-noTM	Unknown	0	0		IPR008928: Six-hairpin glycosidase-like
Bcin16g02680			51.6652		none	Protease	0	0	insulysin [EC:3.4.24.56]	IPR011237: Peptidase M16 domain
Bcin16g02770			0.00526255		SignalP-noTM	Protease	0	Yes		IPR001384: Peptidase M35, deuterolysin
Bcin16g02790	0.0700047	0.0784755	0.0304446		SignalP-noTM	Protease	0	Yes		IPR008758: Peptidase S28
Bcin16g02810	0.336633		0.194833		none	Unknown	0	0		IPR012674: Calycin
Bcin16g02850	10.1629	14.3126	42.7146	21.3808	SignalP-noTM	Oxidoreduction	0	0		IPR006094: FAD linked oxidase, N-terminal	Pfam: FAD_binding_4
Bcin16g03020	0.00673686	0.00470211	0.00254082	0.00760137	SignalP-noTM	Cellulose degradation	GH5.5	0		IPR001547: Glycoside hydrolase, family 5
Bcin16g03080			4.16406		none	Unknown	0	0		IPR002035: von Willebrand factor, type A	vWA-TerF-like
Bcin16g03380			8.30149		none	Oxidoreduction	0	0		IPR002198: Short-chain dehydrogenase/reductase SDR	adh_short_C2
Bcin16g03510		5.89021	6.46844	7.25248	SignalP-noTM	Unknown	0	0		IPR008659: Yeast cell wall synthesis Kre9/Knh1, C-terminal	Pfam: KRE9
Bcin16g03540			3.05173		none	Unknown	0	0		IPR011766: Thiamine pyrophosphate enzyme, C-terminal TPP-binding	TPP_enzyme_N
Bcin16g03830			Infinity		none	Oxidoreduction	0	0		IPR002198: Short-chain dehydrogenase/reductase SDR	adh_short
Bcin16g03950			0.0185934		SignalP-noTM	Cellulose degradation	GH7	0		IPR001722: Glycoside hydrolase, family 7
Bcin16g03980			0		SignalP-noTM	Other CAZy	GH1	0		IPR001360: Glycoside hydrolase, family 1
Bcin16g04000	58.1631	39.0749	42.3971	60.9589	none	DNA / RNA metabolism	0	0	protein SSD1	IPR012340: Nucleic acid-binding, OB-fold
Bcin16g04020			0.216003		SignalP-noTM	Unknown	0	0		None	Pfam: NDUFB11
Bcin16g04050			38.9422		none	Oxidoreduction	0	0	glutamate dehydrogenase (NADP+) [EC:1.4.1.4] AA and Nitrogen metabolism	IPR006095: Glutamate/phenylalanine/leucine/valine dehydrogenase
Bcin16g04210	0.0162783	0.0149247	0.00745329	0.0105914	SignalP-noTM	Oxidoreduction	0	0		IPR000627: Intradiol ring-cleavage dioxygenase, C-terminal	Pfam: Dioxygenase_C
Bcin16g04330			29.5634		none	Signaling	0	0	glycogen synthase kinase 3 beta [EC:2.7.11.26]	IPR000719: Protein kinase domain
Bcin16g04460	0.0170154	0.0179825	0.0192816	0.0220393	SignalP-noTM	Protease	0	Yes		IPR000209: Peptidase S8/S53 domain
Bcin16g04710	10.0221	12.863	40.5076	13.3124	none	DNA / RNA metabolism	0	0	general transcriptional corepressor TUP1	IPR001680: WD40 repeat
Bcin16g04800	7.38916	9.47039	11.187	6.41607	none	Metabolism	0	0		IPR001236: Lactate/malate dehydrogenase, N-terminal	Ldh_1_C
Bcin16g04870	3.14318				none	Other CAZY	GH154	0		IPR016624: Uncharacterised conserved protein UCP014753
Bcin16g05195			51.8811	14.398	SignalP-noTM	Unknown	0	0		IPR008914: Phosphatidylethanolamine-binding protein PEBP	Pfam: PBP
Bcin16g05198			12.4831		none	Metabolism	0	0	gliotoxin/aspirochlorine biosynthesis aminotransferase [EC:2.6.1.-]	IPR004839: Aminotransferase, class I/classII
