# Supplementary material for: A Similar Secretome Disturbance as a Hallmark of Non-pathogenic Botrytis cinerea ATMT-Mutants?
Source: Front Microbiol. 2019 Dec 6;10:2829. doi: 10.3389/fmicb.2019.02829 (PMC6908482; doi:10.3389/fmicb.2019.02829)
Supplement: Supplementary file 6 [file Table_5.XLSX]

## Sheet:  Proteome & Transcriptome
Table S5 - List of the 63 up-regulated genes (red shading) and 160 down-regulated genes (green shading) in NP/T1-4 whose protein products were up-accumulated and down-accumulated in the exoproteomes, respectively.
Gene	SignalP	Functional Classification	CAZY : Family / Group / Inferred substrate preference	MEROPS	KEGG	InterPro	Pfam
Bcin01g00260	none	Other CAZY	AA4 / Other			IPR004113: FAD-linked oxidase, C-terminal
Bcin01g02460	SignalP-noTM	Other CAZy	CBM63 / Other			IPR009009: RlpA-like double-psi beta-barrel domain
Bcin01g03080	none	Unknown				None	DUF900
Bcin01g03770	none	Unknown				IPR016181: Acyl-CoA N-acyltransferase	Acetyltransf_1
Bcin01g04420	none	Metabolism				IPR000873: AMP-dependent synthetase/ligase	AMP-binding
Bcin01g10320	none	Oxidoreduction			glycerol-3-phosphate dehydrogenase (NAD+) [EC:1.1.1.8] Glycerophospholipid, secondary metabolites, MAPK signaling (yeast)	IPR006109: Glycerol-3-phosphate dehydrogenase, NAD-dependent, C-terminal
Bcin02g01690	SignalP-TM	Lipid metabolism				IPR029058: Alpha/Beta hydrolase fold	Abhydrolase_6
Bcin02g03870	none	Unknown				IPR018535: Domain of unknown function DUF1996
Bcin02g04640	SignalP-noTM	Unknown				IPR018620: Ubiquitin 3 binding protein But2, C-terminal	Pfam: But2
Bcin02g04660	SignalP-TM	Unknown				None	But2
Bcin02g06860	none	Metabolism				IPR004304: Acetamidase/Formamidase
Bcin02g07230	SignalP-noTM	FCWE Glucan metabolism	GH16 / FCWE / Glucan			IPR000757: Glycoside hydrolase, family 16
Bcin02g07790	none	Unknown				IPR002889: Carbohydrate-binding WSC	WSC
Bcin03g00680	SignalP-noTM	Unknown				None	None
Bcin03g05450	none	Oxidoreduction				IPR006094: FAD linked oxidase, N-terminal	FAD_binding_4
Bcin03g07660	none	Metabolism				IPR015424: Pyridoxal phosphate-dependent transferase	Aminotran_5
Bcin03g07670	none	Oxidoreduction				IPR006096: Glutamate/phenylalanine/leucine/valine dehydrogenase, C-terminal	ELFV_dehydrog
Bcin04g04680	none	Oxidoreduction				IPR002198: Short-chain dehydrogenase/reductase SDR	adh_short
Bcin05g01660	SignalP-noTM	FCWE Glucan metabolism	GH5_9 / FCWE / Glucan			IPR001547: Glycoside hydrolase, family 5
Bcin05g03750	none	Metabolism			L-serine/L-threonine ammonia-lyase [EC:4.3.1.17 4.3.1.19] Multiple pathways	IPR000634: Serine/threonine dehydratase, pyridoxal-phosphate-binding site
Bcin05g03880	SignalP-TM	Oxidoreduction				IPR001128: Cytochrome P450	p450
Bcin05g07000	none	Lipid metabolism				IPR000873: AMP-dependent synthetase/ligase	AMP-binding
Bcin05g07190	none	Unknown				IPR002818: ThiJ/PfpI	DJ-1_PfpI
Bcin05g07270	none	Other CAZY	GH3 / Other			IPR026892: Glycoside hydrolase family 3
Bcin05g08280	none	Oxidoreduction			IMP dehydrogenase [EC:1.1.1.205] Purine & secondary metabolites	IPR000644: CBS domain
Bcin06g00890	SignalP-noTM	Other CAZy	AA7 / Other			IPR006094: FAD linked oxidase, N-terminal
Bcin06g00960	SignalP-noTM	Unknown				IPR023703: Membrane-bound lytic murein transglycosylase F	None
Bcin06g04540	none	Metabolism				IPR001077: O-methyltransferase, family 2	Methyltransf_2
Bcin06g05120	SignalP-noTM	Unknown				None	None
Bcin06g07000	SignalP-noTM	Unknown				IPR029058: Alpha/Beta hydrolase fold	Pfam: Tannase
Bcin06g07580	none	Unknown				IPR006094: FAD linked oxidase	FAD_binding_4
Bcin06g07590	SignalP-TM	FCWE Glucan metabolism	GH71 / FCWE / Glucan			IPR005197: Glycoside hydrolase, family 71
Bcin06g07600	none	Unknown				None	None
Bcin07g01840	none	Other CAZY	AA3 / Other			IPR000172: Glucose-methanol-choline oxidoreductase, N-terminal	GMC_oxred_N
Bcin07g04790	SignalP-noTM	Unknown				IPR002018: Carboxylesterase, type B	Pfam: COesterase
Bcin07g04810	SignalP-noTM	FCWE Chitin metabolism	GH20 / FCWE / Chitin			IPR013781: Glycoside hydrolase, catalytic domain
Bcin07g05850	SignalP-noTM	Unknown				None	None
Bcin07g07090	none	Oxidoreduction				IPR000907: Lipoxygenase	Lipoxygenase F-box_4
Bcin08g01060	none	Oxidoreduction				IPR006094: FAD linked oxidase, N-terminal	FAD_binding_4
Bcin08g02090	none	Other CAZY	AA3 / Other			IPR000172: Glucose-methanol-choline oxidoreductase, N-terminal	GMC_oxred_N
Bcin09g01030	none	Unknown				IPR022085: Protein of unknown function DUF3632	DUF3632
Bcin09g03700	SignalP-TM	Metabolism				None	Antibiotic_NAT
Bcin09g04240	none	Metabolism				IPR005999: Glycerol kinase	FGGY_C
Bcin09g04450	none	Unknown				IPR001466: Beta-lactamase-related	Beta-lactamase
Bcin10g01300	none	Unknown				IPR029063: S-adenosyl-L-methionine-dependent methyltransferase-like	Methyltransf_25
Bcin10g01510	SignalP-noTM	Unknown				None	Pfam: Rhabdo_matrix
Bcin10g01990	none	Metabolism				IPR001077: O-methyltransferase, family 2	Methyltransf_2
Bcin10g03730	SignalP-noTM	Protease		Protease		IPR005151: Tail specific protease
Bcin10g03910	none	Protein homeostasis			ATP-dependent Clp protease ATP-binding subunit ClpB	IPR001270: ClpA/B family
Bcin11g01420	none	Metabolism				IPR000873: AMP-dependent synthetase/ligase	NAD_binding_4
Bcin11g02830	SignalP-noTM	Unknown				IPR002889: Carbohydrate-binding WSC
Bcin12g03520	SignalP-noTM	Unknown				IPR011042: Six-bladed beta-propeller, TolB-like	None
Bcin12g03550	SignalP-noTM	Stress & virulence factor				IPR009009: RlpA-like double-psi beta-barrel domain
Bcin12g04180	none	Metabolism			L-histidine Nalpha-methyltransferase / hercynylcysteine S-oxide synthase [EC:2.1.1.44 1.14.99.51] Histidine metabolism	IPR017804: Methyltransferase EgtD-like
Bcin12g05640	none	Oxidoreduction				IPR002085: Alcohol dehydrogenase superfamily, zinc-type	ADH_zinc_N
Bcin13g02010	SignalP-noTM	Oxidoreduction				IPR008972: Cupredoxin	Pfam: SoxE
Bcin13g03620	SignalP-TM	Unknown				IPR002889: Carbohydrate-binding WSC	WSC
Bcin13g05580	none	Oxidoreduction			alcohol dehydrogenase, propanol-preferring [EC:1.1.1.1] multiple pathways	IPR002085: Alcohol dehydrogenase superfamily, zinc-type
Bcin14g00390	SignalP-noTM	Unknown				None	None
Bcin14g03700	none	Unknown				IPR000182: GNAT domain	Acetyltransf_1
Bcin14g04350	none	Unknown				None	TetR_C_36
Bcin16g00950	SignalP-noTM	Unknown				IPR001002: Chitin-binding, type 1
Bcin16g05198	none	Metabolism			gliotoxin/aspirochlorine biosynthesis aminotransferase [EC:2.6.1.-]	IPR004839: Aminotransferase, class I/classII
Gene	SignalP	Functional Classification	CAZY : Family / Group / Inferred substrate preference	MEROPS	KEGG	InterPro	Pfam
Bcin01g00800	SignalP-noTM	Oxidoreduction (Laccase)	AA1 / Other			IPR001117: Multicopper oxidase, type 1
Bcin01g01760	SignalP-noTM	FCWE Chitin metabolism	GH18 / FCWE / Chitin			IPR013781: Glycoside hydrolase, catalytic domain
Bcin01g02910	none	Metabolism				IPR000560: Histidine phosphatase superfamily, clade-2	His_Phos_2
Bcin01g03000	none	Metabolism			inorganic pyrophosphatase [EC:3.6.1.1] Oxidative phosphorylation	IPR008162: Inorganic pyrophosphatase	Pyrophosphatase
Bcin01g03530	none	Unknown				None	None
Bcin01g03540	none	Unknown				None	None
Bcin01g04530	SignalP-noTM	Metabolism				IPR000073: Alpha/beta hydrolase fold-1	Pfam: Abhydrolase_1
Bcin01g05680	SignalP-noTM	Other CAZy	GH47 / Other			IPR001382: Glycoside hydrolase, family 47
Bcin01g05720	SignalP-noTM	FCWE	no / FCWE / Other polysaccharide			IPR011330: Glycoside hydrolase/deacetylase, beta/alpha-barrel	Pfam: Polysacc_deac_1
Bcin01g06060	SignalP-noTM	Unknown				None	None
Bcin01g06210	SignalP-noTM	Protease		Protease		IPR001563: Peptidase S10, serine carboxypeptidase
Bcin01g07210	SignalP-noTM	Other CAZy	GH92 / Other			IPR005887: Alpha-1,2-mannosidase, putative
Bcin01g07230	none	Lipid metabolism				IPR006823: Neutral/alkaline nonlysosomal ceramidase	Ceramidase_alk
Bcin01g07250	none	Pectin degradation	GH28 / PCWDE / Pectin		galacturan 1,4-alpha-galacturonidase [EC:3.2.1.67] Pentose and glucuronate interconversions	IPR011050: Pectin lyase fold/virulence factor
Bcin01g08110	SignalP-noTM	Hemicellulose degradation	GH27 / PCWDE / Hemicellulose			IPR000111: Glycoside hydrolase, clan GH-D
Bcin01g08160	none	Unknown				None	Bacillus_HBL Bacillus haemolytic enterotoxin
Bcin01g09430	SignalP-noTM	Cuticle degradation	CE5 / Other / Cutinase			IPR000675: Cutinase
Bcin01g10130	none	Protease				IPR001261: ArgE/DapE/ACY1/CPG2/YscS, conserved site	Peptidase_M20
Bcin01g10140	none	Oxidoreduction				IPR012349: FMN-binding split barrel	Pyridox_ox_2
Bcin01g10150	none	Lipid metabolism Virulence factor				IPR003817: Phosphatidylserine decarboxylase-related	PS_Dcarbxylase
Bcin01g10580	none	Unknown				None	PBP_like_2
Bcin01g11150	SignalP-TM	Pectin degradation	CE8 / PCWDE / Pectin			IPR000070: Pectinesterase, catalytic
Bcin01g11220	SignalP-noTM	FCWE Glucan metabolism	GH17 / FCWE / Glucan			IPR000490: Glycoside hydrolase, family 17
Bcin02g01420	SignalP-noTM	Other CAZy	GH13 / Other			IPR006047: Glycosyl hydrolase, family 13, catalytic domain
Bcin02g03090	SignalP-noTM	Other CAZy	GH1 / Other			IPR001360: Glycoside hydrolase, family 1
Bcin02g03860	none	Unknown				IPR002018: Carboxylesterase, type B	COesterase
Bcin02g04550	SignalP-noTM	Unknown				None	Pfam: CarboxypepD_reg
Bcin02g04690	none	Unknown				IPR000772: Ricin B lectin domain	RicinB_lectin_2
Bcin02g04800	SignalP-noTM	Protease		Protease		IPR000834: Peptidase M14, carboxypeptidase A
Bcin02g05600	SignalP-noTM	Unknown				None	None
Bcin02g07100	SignalP-noTM	PCWDE_HP	CE12 / PCWDE / Hemicellulose and/or Pectine			IPR013831: SGNH hydrolase-type esterase domain
Bcin02g07640	SignalP-noTM	Oxidoreduction (Laccase)	AA1 / Other			IPR001117: Multicopper oxidase, type 1
Bcin02g08230	SignalP-noTM	Lipid metabolism				IPR002018: Carboxylesterase, type B	Pfam: COesterase
Bcin02g09370	none	Unknown				IPR000008: C2 domain	SMP_LBD
Bcin03g00005	none	Unknown				IPR009413: Hemolysin, aegerolysin type	Aegerolysin
Bcin03g00010	none	Unknown				None	None
Bcin03g00380	SignalP-noTM	Oxidoreduction				IPR006094: FAD linked oxidase, N-terminal	Pfam: FAD_binding_4
Bcin03g00500	SignalP-noTM	Stress & virulence factor				IPR009009: RlpA-like double-psi beta-barrel domain	Pfam: Cerato-platanin phytotoxic proteins
Bcin03g01250	SignalP-noTM	Unknown				None	Pfam: PAN_1
Bcin03g01440	SignalP-noTM	Hemicellulose degradation	GH5_7 / PCWDE / Hemicellulose			IPR001547: Glycoside hydrolase, family 5
Bcin03g01540	SignalP-noTM	Other CAZy	AA3 / Other			IPR000172: Glucose-methanol-choline oxidoreductase, N-terminal
Bcin03g01610	none	Hemicellulose degradation	GH26 / PCWDE / Hemicellulose			IPR013781: Glycoside hydrolase, catalytic domain
Bcin03g01680	SignalP-noTM	Pectin degradation	GH28 / PCWDE / Pectin			IPR000743: Glycoside hydrolase, family 28
Bcin03g02970	SignalP-noTM	FCWE Chitin metabolism	CE4 / FCWE / Chitin			IPR001002: Chitin-binding, type 1
Bcin03g03480	SignalP-noTM	Hemicellulose degradation	GH10 / PCWDE / Hemicellulose			IPR001000: Glycoside hydrolase, family 10
Bcin03g03630	SignalP-noTM	PCWDE_HC	GH12 / PCWDE / Cellulose and/or Hemicellulose			IPR002594: Glycoside hydrolase, family 12
Bcin03g05600	SignalP-noTM	Lipid metabolism			phospholipase C [EC:3.1.4.3] Multiple pathways	IPR007312: Phosphoesterase
Bcin03g06930	SignalP-noTM	Unknown				None	Pfam: DUF3309
Bcin03g07320	SignalP-noTM	Unknown			ribonuclease T2 [EC:4.6.1.19] Transfer RNA biogenesis	IPR001568: Ribonuclease T2-like
Bcin04g04190	none	Other CAZY	GH15,CBM20 / Other			IPR000165: Glucoamylase
Bcin04g04930	SignalP-noTM	Pectin degradation	GH28 / PCWDE / Pectin			IPR000743: Glycoside hydrolase, family 28
Bcin04g05960	SignalP-noTM	Oxidoreduction				IPR008972: Cupredoxin	Pfam: Cu_bind_like
Bcin04g06250	SignalP-noTM	Other CAZy	GH13 / Other			IPR006047: Glycosyl hydrolase, family 13, catalytic domain
Bcin05g01510	SignalP-noTM	Unknown				None	Pfam: PAN_4
Bcin05g03460	SignalP-noTM	Unknown				IPR029058: Alpha/Beta hydrolase fold	Pfam: Hydrolase_4
Bcin05g04380	none	Unknown				IPR006175: YjgF/Yer057p/UK114 family	Ribonuc_L-PSP
Bcin05g04720	none	Unknown				IPR006056: Enamine/imine deaminase YjgF-like	Ribonuc_L-PSP
Bcin05g05160	SignalP-noTM	Unknown				None	Pfam: Glyco_hydro_88
Bcin05g05170	none	Unknown				IPR002678: GTP cyclohydrolase 1 type 2/Nif3	None
Bcin05g05830	SignalP-noTM	Protease		Protease		IPR000209: Peptidase S8/S53 domain
Bcin05g06020	SignalP-noTM	Hemicellulose degradation	GH10 / PCWDE / Hemicellulose			IPR000254: Cellulose-binding domain, fungal GH10
Bcin06g00330	none	Protease		Protease		IPR000209: Peptidase S8/S53 domain
Bcin06g00620	SignalP-noTM	Protease				IPR000209: Peptidase S8/S53 domain	Pfam: Pro-kuma_activ
Bcin06g01580	SignalP-noTM	Pectin degradation	GH79 / PCWDE / Pectin			IPR017853: Glycoside hydrolase, superfamily
Bcin06g02140	SignalP-noTM	Pectin degradation	GH28 / PCWDE / Pectin			IPR000743: Glycoside hydrolase, family 28
Bcin06g02510	SignalP-noTM	Protease		Protease		IPR001563: Peptidase S10, serine carboxypeptidase
Bcin06g03070	SignalP-noTM	Protease		Protease		IPR000209: Peptidase S8/S53 domain
Bcin06g05050	SignalP-noTM	Other CAZy	AA13,CBM20 / Other			IPR002044: Carbohydrate binding module family 20
Bcin06g06410	SignalP-noTM	Hemicellulose degradation	CE16 / PCWDE / Hemicellulose			IPR000254: Cellulose-binding domain, fungal IPR013830: SGNH hydrolase-type esterase domain
Bcin06g06670	SignalP-noTM	Unknown				None	None
Bcin06g07050	SignalP-noTM	Cellulose degradation	AA9 / PCWDE / Cellulose			IPR005103: Glycoside hydrolase, family 61
Bcin06g07380	none	Metabolism				IPR004304: Acetamidase/Formamidase
Bcin07g02860	SignalP-noTM	Other CAZy	GH25 / Other			IPR013781: Glycoside hydrolase, catalytic domain
Bcin07g02940	SignalP-noTM	Unknown				IPR006652: Kelch repeat type 1	Pfam: Kelch_1
Bcin07g04000	SignalP-noTM	Other CAZy	GH92 / Other			IPR005887: Alpha-1,2-mannosidase, putative
Bcin07g04350	SignalP-noTM	Lipid metabolism			sphingomyelin phosphodiesterase [EC:3.1.4.12] Sphingolipid metabolism	IPR004843: Calcineurin-like phosphoesterase domain, apaH type
Bcin07g04370	SignalP-noTM	Oxidoreduction				IPR029045: ClpP/crotonase-like domain	Pfam: Peptidase_S41
Bcin08g00400	SignalP-noTM	Unknown				None	Pfam: Lipocalin_4
Bcin08g00720	SignalP-noTM	Protease		Protease		IPR001461: Aspartic peptidase
Bcin08g00890	SignalP-noTM	PCWDE_HP	GH51 / PCWDE / Hemicellulose and/or Pectine			IPR010720: Alpha-L-arabinofuranosidase, C-terminal
Bcin08g00950	SignalP-noTM	Hemicellulose degradation	CE16 / PCWDE / Hemicellulose			IPR013830: SGNH hydrolase-type esterase domain
Bcin08g01020	SignalP-noTM	Protease		Protease		IPR000209: Peptidase S8/S53 domain
Bcin08g02080	none	Unknown				IPR007138: Antibiotic biosynthesis monooxygenase-like domain	ABM Dabb
Bcin08g02110	SignalP-noTM	Other CAZy	CBM1,GH5 / Other			IPR001547: Glycoside hydrolase, family 5
Bcin08g02120	SignalP-noTM	Hemicellulose degradation	GH27 / PCWDE / Hemicellulose			IPR002241: Glycoside hydrolase, family 27
Bcin08g02390	SignalP-noTM	Protease		Protease		IPR008758: Peptidase S28
Bcin08g05870	SignalP-noTM	Hemicellulose degradation	GH95 / PCWDE / Hemicellulose			IPR008928: Six-hairpin glycosidase-like
Bcin09g00200	SignalP-noTM	FCWE Glucan metabolism	GH17 / FCWE / Glucan			IPR013781: Glycoside hydrolase, catalytic domain
Bcin09g00220	SignalP-noTM	Unknown				None	None
Bcin09g00620	SignalP-noTM	FCWE Chitin metabolism	no / FCWE / Chitin			IPR002509: Polysaccharide deacetylase
Bcin09g01190	SignalP-noTM	Protease				IPR000209: Peptidase S8/S53 domain	Pfam: Pro-kuma_activ
Bcin09g01800	SignalP-noTM	Hemicellulose degradation	CE3 / PCWDE / Hemicellulose			IPR013830: SGNH hydrolase-type esterase domain
Bcin09g02890	SignalP-noTM	Unknown				IPR021851: Protein of unknown function DUF3455
Bcin09g03430	SignalP-noTM	Metabolism			amidase [EC:3.5.1.4] AA metabolism	IPR000120: Amidase
Bcin09g04020	SignalP-noTM	Other CAZy	CEnc / Other			IPR013831: SGNH hydrolase-type esterase domain
Bcin09g04410	SignalP-noTM	Other CAZy	CBM32,AA5 / Other			IPR000421: Coagulation factor 5/8 C-terminal type domain
Bcin09g04440	SignalP-noTM	PCWDE_HP	GH51 / PCWDE / Hemicellulose and/or Pectine			IPR010720: Alpha-L-arabinofuranosidase, C-terminal
Bcin09g04570	SignalP-noTM	Other CAZy	AA3 / Other			IPR000172: Glucose-methanol-choline oxidoreductase, N-terminal
Bcin09g05250	SignalP-noTM	Unknown				IPR018620: Ubiquitin 3 binding protein But2, C-terminal
Bcin09g05400	none	Oxidoreduction				IPR006076: FAD dependent oxidoreductase	DAO
Bcin09g06730	SignalP-noTM	Cellulose degradation	AA9 / PCWDE / Cellulose			IPR005103: Glycoside hydrolase, family 61
Bcin09g06750	SignalP-noTM	Cellulose degradation	AA9 / PCWDE / Cellulose			IPR005103: Glycoside hydrolase, family 62
Bcin10g00310	SignalP-noTM	FCWE Glucan metabolism	GH55 / FCWE / Glucan			IPR012334: Pectin lyase fold
Bcin10g01080	SignalP-noTM	Other CAZy	AA3 / Other			IPR000172: Glucose-methanol-choline oxidoreductase, N-terminal
Bcin10g02530	SignalP-noTM	Protease		Protease		IPR000209: Peptidase S8/S53 domain
Bcin10g04180	none	Unknown				None	None
Bcin10g04190	none	Other CAZY	AA5 / Other			IPR009880: Glyoxal oxidase, N-terminal	DUF1929
Bcin10g05010	SignalP-noTM	Pectin degradation	GH28 / PCWDE / Pectin			IPR000743: Glycoside hydrolase, family 28
Bcin10g05630	SignalP-noTM	Other CAZy	GH3 / Other			IPR001764: Glycoside hydrolase, family 3, N-terminal
Bcin10g06130	SignalP-noTM	Pectin degradation	GH28 / PCWDE / Pectin			IPR000743: Glycoside hydrolase, family 28
Bcin11g02900	SignalP-noTM	Protease		Protease		IPR001254: Peptidase S1
Bcin11g06120	SignalP-noTM	Oxidoreduction				IPR006094: FAD linked oxidase, N-terminal	Pfam: FAD_binding_4
Bcin12g00180	SignalP-noTM	Protease		Protease		IPR001461: Aspartic peptidase
Bcin12g00350	SignalP-noTM	Unknown				None	None
Bcin12g00380	SignalP-noTM	Unknown				IPR011089: Domain of unknown function DUF1524
Bcin12g00950	SignalP-noTM	Hemicellulose degradation	GH5_7 / PCWDE / Hemicellulose			IPR001547: Glycoside hydrolase, family 5
Bcin12g01270	SignalP-noTM	Protease				IPR001461: Aspartic peptidase
Bcin12g01520	SignalP-noTM	Other CAZy	AA5 / Other			IPR009880: Glyoxal oxidase, N-terminal
Bcin12g02040	SignalP-noTM	Protease		Protease		IPR001461: Aspartic peptidase
Bcin12g02190	SignalP-noTM	Lipid metabolism				IPR002018: Carboxylesterase, type B	Pfam: COesterase
Bcin12g03390	SignalP-noTM	Other CAZy	GH15,CBM20 / Other			IPR000165: Glucoamylase
Bcin12g04530	SignalP-noTM	Pectin degradation	GH28 / PCWDE / Pectin			IPR000743: Glycoside hydrolase, family 28
Bcin12g04640	SignalP-noTM	Oxidoreduction				IPR006094: FAD linked oxidase, N-terminal	Pfam: FAD_binding_4
Bcin12g06300	SignalP-noTM	Protease		Protease		IPR001384: Peptidase M35, deuterolysin
Bcin13g00050	SignalP-noTM	Unknown				None	Pfam: DUF3623
Bcin13g00300	SignalP-noTM	Unknown				None	None
Bcin13g00380	SignalP-noTM	Unknown				None	Pfam: AglB_L1
Bcin13g01770	SignalP-noTM	Unknown				None	None
Bcin13g02070	none	Unknown				None	None
Bcin13g02080	none	Unknown				None	Lebercilin
Bcin13g02100	SignalP-noTM	Cellulose degradation	GH7 / PCWDE / Cellulose			IPR000254: Cellulose-binding domain, fungal
Bcin13g02960	SignalP-noTM	Protease		Protease		IPR000834: Peptidase M14, carboxypeptidase A
Bcin13g04640	none	Oxidoreduction				IPR002198: Short-chain dehydrogenase/reductase SDR	adh_short
Bcin13g05110	SignalP-noTM	Other CAZy	GH13 / Other			IPR006047: Glycosyl hydrolase, family 13, catalytic domain
Bcin13g05770	none	Unknown				IPR014870: Domain of unknown function DUF1793	DUF4965
Bcin14g00650	SignalP-noTM	Hemicellulose degradation	GH31 / PCWDE / Hemicellulose			IPR000322: Glycoside hydrolase, family 31
Bcin14g00810	SignalP-noTM	Unknown				IPR011042: Six-bladed beta-propeller, TolB-like	Pfam: Phytase-like
Bcin14g01200	SignalP-noTM	Unknown				None	None
Bcin14g01700	SignalP-noTM	Cellulose degradation	GH6 / PCWDE / Cellulose			IPR000254: Cellulose-binding domain, fungal
Bcin14g03430	SignalP-noTM	Pectin degradation	PL1 / PCWDE / Pectin			IPR002022: Pectate lyase/Amb allergen
Bcin14g04450	none	Unknown				None	None
Bcin14g05510	SignalP-noTM	PCWDE_HP	GH62 / PCWDE / Hemicellulose and/or Pectine			IPR005193: Glycoside hydrolase, family 62, arabinosidase
Bcin15g00100	SignalP-noTM	Stress & virulence factor				None	Pfam: zinc_ribbon_16
Bcin15g00130	SignalP-noTM	Cuticle degradation	CE5 / Other / Cutinase		acetylxylan esterase [EC:3.1.1.72] Not Included in Pathway	IPR000675: Cutinase	Pfam: Cutinase
Bcin15g00510	none	Metabolism			cytidine deaminase [EC:3.5.4.5] Pyrimidine metabolism	IPR002125: CMP/dCMP deaminase, zinc-binding
Bcin15g00520	none	Unknown				None	LEA_2
Bcin15g01030	SignalP-noTM	PCWDE_HP	CE1 / PCWDE / Hemicellulose and/or Pectine			IPR010126: Esterase, PHB depolymerase IPR029058: Alpha/Beta hydrolase fold IPR000254: Cellulose-binding domain, fungal
Bcin15g01990	SignalP-noTM	Oxidoreduction				IPR008972: Cupredoxin	Pfam: Cu_bind_like
Bcin15g02540	SignalP-noTM	Oxidoreduction				IPR012951: Berberine/berberine-like	Pfam: FAD_binding_4
Bcin15g03060	none	Unknown				IPR009291: Vacuolar protein sorting-associated protein 62	Vps62
Bcin15g03150	SignalP-noTM	Protease			tripeptidyl-peptidase I [EC:3.4.14.9]	IPR000209: Peptidase S8/S53 domain	Pfam: Pro-kuma_activ
Bcin15g04670	SignalP-noTM	Protease		Protease		IPR000209: Peptidase S8/S53 domain
Bcin15g05030	SignalP-noTM	Pectin degradation	GH28 / PCWDE / Pectin			IPR000743: Glycoside hydrolase, family 28
Bcin16g00080	SignalP-noTM	Oxidoreduction				IPR006094: FAD linked oxidase, N-terminal	Pfam: FAD_binding_4
Bcin16g01630	SignalP-noTM	Unknown				IPR000772: Ricin B lectin domain	Ricin_B_lectin
Bcin16g02560	SignalP-noTM	Unknown				IPR008928: Six-hairpin glycosidase-like
Bcin16g02770	SignalP-noTM	Protease		Protease		IPR001384: Peptidase M35, deuterolysin
Bcin16g02790	SignalP-noTM	Protease		Protease		IPR008758: Peptidase S28
Bcin16g03020	SignalP-noTM	Cellulose degradation	GH5_5 / PCWDE / Cellulose			IPR001547: Glycoside hydrolase, family 5
Bcin16g04210	SignalP-noTM	Oxidoreduction				IPR000627: Intradiol ring-cleavage dioxygenase, C-terminal	Pfam: Dioxygenase_C
