# Supplementary material for: A Similar Secretome Disturbance as a Hallmark of Non-pathogenic Botrytis cinerea ATMT-Mutants?
Source: Front Microbiol. 2019 Dec 6;10:2829. doi: 10.3389/fmicb.2019.02829 (PMC6908482; doi:10.3389/fmicb.2019.02829)
Supplement: Supplementary file 7 [file Table_6.XLSX]

## Sheet: TABLE S6
Table S6 - Secreted enzymatic activities of non-pathogenic transformants NP/T1-T4. The parental strain B05-10 and the transformants NP/T1-4 were cultured for 7 days in CCPX liquid medium. The culture supernatants were used to measure selected enzymatic activities and pH. Dry mycelium weigth are indicated. Data are expressed in means ± SEM with their conversion in percentages of the parent control…
		B05.10	NP/T1	NP/T2	NP/T3	NP/T4
Acid proteases	U DO/50ml	50.0 ± 4.1 (100 %)	1.7 ± 2.0* (3 %)	-3.6 ± 2.1* (-7 %)	-1.4 ± 1.9* (-3 %)	-2.2 ± 0.9* (-4 %)
Laccases	U DO/min/50ml	37.7 ± 16.3 (100 %)	0.5 ± 0.2* (1 %)	2.5 ± 1.0* (7 %)	0.3 ± 0.2* (0.7 %)	0.5 ± 0.3* (1 %)
Lipases	mU /min/50ml	4.6 ± 0.6 (100 %)	0.2 ± 0.4* (5 %)	-0.6 ± 0.0* (-13 %)	-0.1 ± 0.3* (-2 %)	0.1 ± 0.2* (2 %)
Cellulases		106.5 ± 11.8 (100 %)	92.8 ± 15.3 (87 %)	99.9 ± 11.6 (94 %)	83.2 ± 6.7 (78 %)	79.5 ± 16.6 (75 %)
Xylanases	U /min/50ml	1.4 ± 0.1 (100 %)	0.1 ± 0.0* (7 %)	0.1 ± 0.0* (8 %)	0.1 ± 0.0* (9 %)	0.1 ± 0.0* (9 %)
Polygalacturonases		823.4 ± 91.5 (100 %)	588.6 ± 455.2 (71 %)	1072.5 ± 72.6 (130 %)	892.2 ± 106.3 (108 %)	891.7 ± 73.1 (108 %)
Mycelium weight	mg	193.3 ± 24.0 (100 %)	143.3 ± 33.3 (74 %)	140.0 ± 19.9 (72 %)	136.6 ± 6.6 (71 %)	130.0 ± 15.3 (67 %)
	pH	6.6±0.1	7.8 ± 0.2*	8.1 ± 0.0*	8.0 ± 0.0*	7.9 ± 0.0*
