# Supplementary material for: A Similar Secretome Disturbance as a Hallmark of Non-pathogenic Botrytis cinerea ATMT-Mutants?
Source: Front Microbiol. 2019 Dec 6;10:2829. doi: 10.3389/fmicb.2019.02829 (PMC6908482; doi:10.3389/fmicb.2019.02829)
Supplement: Supplementary file 8 [file Table_7.XLSX]

## Sheet: TABLE S7
Table S7 - Growth of non-pathogenic transformants NP/T1-T12 on regular or specific substrates. The parental strain B05-10 and transformants NP/T1-12 were inoculated (mycelial plugs collected from 3-day-old MM cultures) on various solid media. On specific substrates, the surfaces covered by the mycelia were measured at 3 dpi (polygalacturonic acid, galacturonic acid, xylan and xylose), 4 dpi (cell…
	B05.10	NP/T1	NP/T2	NP/T3	NP/T4	NP/T5	NP/T6	NP/T7	NP/T8	NP/T9	NP/T10	NP/T11	NP/T12
REGULAR MEDIA (mm/day)
CM	27.9 ± 1.8 (100%)	26.60 ± 0.9 (95 %)	26.5 ± 0.6 (95 %)	25.7 ± 1.2 (92 %)	25.7 ± 0.7 (92 %)	25.2 ± 0.3 (90 %)	24.1 ± 0.7 (83 %)	23.8 ± 2.0 (85 %)	20.5 ± 0.8* (73 %)	20.2 ± 0.5* (73 %)	13.5 ± 0.7* (48 %)	12.7 ± 0.6* (45 %)	10.9 ± 0.7* (39 %)
CM pH8	12.2 ± 0.5 (100%)	10.3 ± 0.2 (84 %)	11.0 ± 0.2* (89 %)	7.6 ± 1.7 (62 %)	10.4 ± 0.3* (85 %)	6.5 ± 1.2* (52 %)	11.8 ± 0.4 (96 %)	11.5 ± 0.3 (94 %)	11.3 ± 1.4 (92 %)	6.8 ± 2.5 (55 %)	8.7 ± 1.1* (71 %)	5.6 ± 0.1* (46 %)	8.3 ± 1.2* (68 %)
MM	19.1 ± 2.0 (100%)	12.3 ± 1.8* (64 %)	11.6 ± 0.4* (60 %)	7.2 ± 1.0* (37 %)	10.7 ± 1.4* (56 %)	11.4 ± 1.7* (59 %)	16.8 ± 0.8 (88 %)	16.9 ± 1.8 (88 %)	8.6 ± 1.0* (45 %)	11.0 ± 2.5* (57 %)	6.5 ± 0.6* (34 %)	9.1 ± 0.7* (48 %)	6.2 ± 0.4* (32 %)
SPECIFIC SUBSTRATES (mm2)
Xylan	378.7 ± 21.3 (100 %)	17.5 ± 8.3* (5 %)	16.5 ± 6.6* (4 %)	35.2 ± 13.0* (9 %)	17.5 ± 8.3* (5 %)	191.2 ± 111.0 (50 %)	397.8 ± 147.0 (105 %)	231.8 ± 181.0 (61 %)	22.9 ± 3.7* (6 %)	13.7 ± 2.0* (4 %)	147.9 ± 55.6* (39 %)	217.4 ± 8.5* (57 %)	67.3 ± 19.6* (18 %)
BSA	353.4 ± 10.5 (100 %)	175.8 ± 21.2* (50 %)	160.3 ± 8.7* (45 %)	144.0 ± 12.6* (41 %)	149.1 ± 18.8* (42 %)	117.2 ± 20.5* (33 %)	173.9 ± 12.0* (49 %)	309.7 ± 12.0 (88 %)	10.04 ± 0.5* (3 %)	31.5 ± 7.3* (9 %)	90.7 ± 7.3* (26 %)	211.5 ± 10.5* (60 %)	127.1 ± 43.4* (36 %)
Cellulose	413.1 ± 43.0 (100 %)	39.5 ± 18.4* (9 %)	36.6 ± 16.19* (9 %)	41.5 ± 15.3* (10 %)	35.1 ± 15.1* (8 %)	51.1 ± 19.8* (12 %)	479.1 ± 36.3 (116 %)	386.0 ± 182.2 (93 %)	30.0 ± 6.0* (7.3 %)	22.0 ± 3.5* (5 %)	106.4 ± 9.1* (26 %)	212.2 ± 12.4* (12 %)	131.9 ± 9.7* (32 %)
Polygalacturonic ac.	511.0 ± 27.7 (100 %)	258.7 ± 22.8* (51 %)	198.5 ± 10.9* (39 %)	180.3 ± 9.6* (35 %)	225.8 ± 15.6* (44 %)	20.5 ± 0.8* (73 %)	280.4 ± 95.9 (55 %)	477.8 ± 167.4 (93 %)	52.2 ± 33.1* (10 %)	39.5 ± 13.1* (8 %)	101.3 ± 19.6* (20 %)	94.6 ± 38.8* (18 %)	50.2 ± 3.4* (10 %)
Xylose	360.7 ± 44.3 (100 %)	6.0 ± 0.9* (2 %)	9.7 ± 2.1* (3 %)	7.9 ± 1.7* (2 %)	5.9 ± 1.2* (2 %)	75.1 ± 28.3* (21 %)	123.2 ± 9.0* (34 %)	104.5 ± 11.3* (29 %)	11.4 ± 1.9* (3 %)	24.6 ± 0.5* (7 %)	22.7 ± 1.6* (6 %)	67.2 ± 14.7* (19 %)	16.3 ± 1.3* ( 4%)
AA	218.0 ± 44.7 (100 %)	20.6 ± 13.8* (10 %)	17.19 ± 6.2* (8 %)	15.5 ± 7.8* (7 %)	18.8 ± 10.8* (9 %)	9.3 ± 0.3* (4 %)	125.0 ± 53.0 (57 %)	153.5 ± 86.1 (70 %)	20.4 ± 6.4* (9 %)	18.4 ± 2.9* (8 %)	56.7 ± 12.7* (26 %)	108.3 ± 16.3 (50 %)	82.8 ± 36.5 (38 %)
Galacturonic ac.	282.3 ± 18.8 (100 %)	51.5 ± 6.0* (18 %)	50.5 ± 12.6* (18 %)	57.5 ± 21.1* (20 %)	45.0 ± 8.8* (16 %)	130.8 ± 1.0 (46 %)	418.3 ± 156.0 (148 %)	508.9 ± 192.3 (180 %)	84.0 ± 57.2* (30 %)	31.3 ± 18.3* (11 %)	172.6 ± 97.5 (61 %)	134.5 ± 21.2* (48 %)	133.8 ± 29.3* (47 %)
Glucose	589.2 ± 43.7 (100 %)	192.6 ± 38.1* (33 %)	180.0 ± 20.3* (3%)	146.2 ± 18.5* (25 %)	172.4 ± 20.8* (30 %)	380.5 ± 90.4 (65 %)	530.5 ± 142.2 (90 %)	431.5 ± 145.1 (73 %)	83.4 ± 52.3* (14 %)	163.4 ± 74.3* (28 %)	287.2 ± 27.6* (49 %)	196.0 ± 82.7* (33 %)	82.4 ± 18.6* (14 %)
